# Supplementary material for: In vivo targeting of de novo DNA methylation by histone modifications in yeast and mouse
Source: eLife. 2015 Apr 7;4:e06205. doi: 10.7554/eLife.06205 (PMC4412109; doi:10.7554/eLife.06205)
Supplement: Supplementary file 4. — (A) Yeast mRNA differential expression using Deseq. (B) Upregulated genes in DNMT3b-expressing strain vs EV. (C) Downregulated genes in DNMT3b-expressing strain vs EV. (D) Gene Ontology (GO) term analysis for upregulated genes in DNMT3b-expressing strain vs EV. (E) GO term analysis for downregulated genes in DNMT3b-expressing strain vs EV. (F) RPKM values of yeast verified ORF in DNMT3b-expressing strain. DOI: http://dx.doi.org/10.7554/eLife.06205.025 [file elife-06205-supp4.xlsx]

## Sheet: Panel A
Supplementary File 4 - Panel A: Yeast mRNA Differential Expression using Deseq
id	baseMean	base EV	base DNMT3b-expressing	foldChange	log2FoldChange	pval	padj
YAL012W	864.785	755.339	937.749	1.24149	0.312078	0.271019	0.589849
YAL069W	1.73182	2.44472	1.25655	0.513986	-0.960198	0.612308	0.857649
YAL068W-A	0.188501	0.471252	0	0	#NAME?	0.789256	0.942299
YAL068C	10.8379	8.24772	12.5647	1.52342	0.607309	0.366907	0.682541
YAL067W-A	1.3823	1.03097	1.61652	1.56796	0.648892	0.945545	1
YAL067C	285.28	401.124	208.05	0.518668	-0.947117	0.00171789	0.0346863
YAL066W	2.40917	2.06193	2.64067	1.28068	0.356907	0.972968	1
YAL065C	285.935	323.044	261.195	0.808541	-0.306606	0.269732	0.589256
YAL064W-B	94.7389	108.78	85.3778	0.784863	-0.349487	0.269341	0.588904
YAL064C-A	74.7418	79.9714	71.2554	0.891012	-0.166484	0.608181	0.855125
YAL064W	13.8488	13.7853	13.8911	1.00767	0.011024	1	1
YAL063C-A	40.3	40.1771	40.3819	1.0051	0.00733552	1	1
YAL063C	1685.35	1840.59	1581.85	0.859429	-0.21855	0.401079	0.712834
YAL062W	10602.3	7745.6	12506.8	1.6147	0.691266	0.0129114	0.118953
YAL061W	12922	17871.4	9622.47	0.538428	-0.893173	0.000529848	0.0149648
YAL060W	15055.7	19204.1	12290.2	0.639978	-0.643905	0.187926	0.505384
YAL059C-A	0	0	0	NA	NA	NA	NA
YAL059W	110.297	95.8476	119.93	1.25126	0.323382	0.37406	0.690115
YAL058W	219.87	235.678	209.332	0.888213	-0.171022	0.549887	0.821539
YAL056C-A	4.00919	2.53318	4.9932	1.97112	0.979013	0.467058	0.765459
YAL056W	1875.65	1989.13	1800	0.904918	-0.14414	0.579692	0.841612
YAL055W	727.817	841.851	651.794	0.774238	-0.36915	0.168678	0.478877
YAL054C	9320.66	10069.1	8821.72	0.876122	-0.190797	0.720842	0.914729
YAL053W	3980.3	3345.65	4403.4	1.31616	0.396331	0.130672	0.419492
YAL051W	695.927	748.268	661.032	0.883416	-0.178835	0.492229	0.784321
YAL049C	1565.92	1852.05	1375.16	0.742507	-0.429523	0.105436	0.374066
YAL048C	389.507	453.882	346.59	0.763612	-0.389088	0.136311	0.427482
YAL047W-A	1.59036	0.471252	2.33644	4.95794	2.30974	0.408035	0.717735
YAL047C	243.852	272.734	224.597	0.823501	-0.280158	0.354573	0.671897
YAL046C	300.645	271.348	320.176	1.17995	0.238722	0.410293	0.719953
YAL045C	17.158	22.6523	13.4952	0.595755	-0.74721	0.17531	0.486277
YAL044W-A	95.9366	107.191	88.4333	0.825004	-0.277527	0.402528	0.714043
YAL044C	1743.53	1891.53	1644.87	0.869596	-0.201582	0.438361	0.742496
YAL043C	874.655	912.127	849.673	0.931529	-0.102327	0.682401	0.895467
YAL042C-A	18.9851	23.093	16.2465	0.703526	-0.507325	0.428166	0.734625
YAL042W	1414.28	1248.78	1524.61	1.22088	0.287917	0.279862	0.599223
YAL041W	437.924	408.087	457.816	1.12186	0.165891	0.535722	0.813755
YAL040C	687.63	460.071	839.336	1.82436	0.867392	0.00216073	0.0406843
YAL039C	3013.97	2532.89	3334.69	1.31656	0.396768	0.144629	0.439023
YAL038W	21074.7	10994.5	27794.8	2.52806	1.33803	0.000316883	0.0105024
YAL037C-B	30.213	10.8983	43.0895	3.95378	1.98323	7.74174e-05	0.00361801
YAL037C-A	5.72755	6.12628	5.46173	0.891525	-0.165652	0.861781	0.97346
YAL037W	149.846	147.869	151.164	1.02229	0.0318013	0.930171	0.994305
YAL036C	314.499	214.023	381.483	1.78244	0.833857	0.0054314	0.0727472
YAL035W	1860.52	1256.81	2262.99	1.80059	0.848469	0.00174606	0.0346863
YAL034C-B	8.7509	7.39368	9.65572	1.30594	0.385092	0.590772	0.846453
YAL034W-A	126.728	116.793	133.352	1.14178	0.191279	0.515714	0.799637
YAL034C	6034.69	7893.75	4795.31	0.607482	-0.719086	0.00563087	0.0746492
YAL033W	173.024	168.105	176.303	1.04876	0.0686895	0.815181	0.954473
YAL032C	713.512	737.988	697.195	0.944724	-0.0820354	0.761716	0.929207
YAL031W-A	40.5132	52.4618	32.5475	0.620404	-0.68872	0.0838696	0.333221
YAL031C	964.27	1115.35	863.548	0.774239	-0.369149	0.169625	0.479939
YAL030W	979.176	1130.67	878.177	0.776685	-0.364599	0.175542	0.486277
YAL029C	520.753	370.025	621.238	1.67891	0.747525	0.00877888	0.0983235
YAL028W	798.665	994.26	668.269	0.672126	-0.573195	0.0303767	0.194029
YAL027W	431.308	424.109	436.107	1.02829	0.0402453	0.891082	0.983861
YAL026C-A	44.006	53.4333	37.7211	0.705948	-0.502366	0.191813	0.509409
YAL026C	606.958	705.222	541.448	0.76777	-0.381253	0.138234	0.430062
YAL025C	289.86	175.613	366.025	2.08427	1.05954	0.000419642	0.0127981
YAL024C	159.068	132.581	176.726	1.33296	0.414637	0.174224	0.485033
YAL023C	1253.13	894.659	1492.11	1.6678	0.737942	0.045232	0.241911
YAL022C	583.41	782.631	450.595	0.575744	-0.7965	0.00716221	0.0864438
YAL021C	1382.27	1231.56	1482.74	1.20395	0.267776	0.309846	0.626637
YAL020C	255.986	219.652	280.21	1.2757	0.351288	0.23089	0.556328
YAL019W-A	0.382931	0.471252	0.324049	0.687635	-0.540286	1	1
YAL019W	300.983	239.062	342.265	1.4317	0.51773	0.0809736	0.327525
YAL018C	300.277	329.402	280.86	0.852637	-0.229997	0.412417	0.721262
YAL017W	2616.49	3024.55	2344.46	0.775141	-0.36747	0.225504	0.549742
YAL016C-B	74.4091	94.7925	60.8201	0.641613	-0.640225	0.28875	0.60687
YAL016C-A	100.469	98.9726	101.467	1.0252	0.0359025	0.915352	0.990691
YAL016W	3281.01	3444.03	3172.33	0.921108	-0.118557	0.679742	0.894934
YAL015C	845.443	995.287	745.547	0.749078	-0.416813	0.105832	0.37506
YAL014C	887.983	920.798	866.106	0.940604	-0.0883411	0.757442	0.929207
YAL013W	1312.35	1430.68	1233.45	0.862144	-0.214	0.427491	0.733995
YAL011W	457.517	481.901	441.261	0.915667	-0.127106	0.644473	0.874191
YAL010C	324.294	292.823	345.275	1.17912	0.237715	0.398943	0.711447
YAL009W	355.203	355.767	354.827	0.99736	-0.00381373	0.97153	1
YAL008W	1805.04	1931.51	1720.73	0.890871	-0.166711	0.597043	0.848769
YAL007C	261.912	168.165	324.41	1.92912	0.947944	0.0421162	0.232367
YAL005C	57106.1	57910.5	56569.8	0.976848	-0.0337934	0.932825	0.99534
YAL004W	0	0	0	NA	NA	NA	NA
YAL003W	4157.96	3307.39	4725	1.42862	0.514624	0.125318	0.410729
YAL002W	780.471	841.348	739.887	0.879407	-0.185398	0.475663	0.772283
YAL001C	748.157	803.082	711.541	0.886013	-0.1746	0.498244	0.787684
YAR002W	433.568	342.338	494.387	1.44415	0.530219	0.0591621	0.277827
YAR002C-A	869.96	519.244	1103.77	2.12572	1.08795	0.00225594	0.0418702
YAR003W	288.653	286.192	290.293	1.01433	0.0205293	0.951781	1
YAR007C	861.944	644.49	1006.91	1.56234	0.643711	0.0198473	0.152288
YAR008W	136.974	87.7478	169.791	1.93499	0.952327	0.116319	0.394779
YAR009C	223.252	182.037	250.728	1.37735	0.461895	0.12325	0.407032
YAR010C	268.536	198.235	315.403	1.59106	0.669985	0.0464306	0.244379
YAR014C	616.847	594.182	631.957	1.06357	0.0889214	0.74422	0.923444
YAR015W	2606.52	2031.75	2989.7	1.47149	0.557276	0.102284	0.367907
YAR018C	243.886	150.757	305.972	2.02956	1.02117	0.000527407	0.0149609
YAR019C	844.471	955.433	770.496	0.806437	-0.310367	0.234688	0.560995
YAR019W-A	10.874	13.6084	9.051	0.665103	-0.588351	0.359539	0.677367
YAR020C	120.552	163.481	91.9318	0.562339	-0.830489	0.0070811	0.0862835
YAR023C	335.535	364.342	316.33	0.868221	-0.203865	0.461148	0.762989
YAR027W	1809.99	1801.1	1815.92	1.00823	0.0118179	0.922839	0.991879
YAR028W	620.761	572.673	652.82	1.13995	0.188973	0.557891	0.827977
YAR029W	50.5231	56.5262	46.5211	0.823	-0.281035	0.4619	0.762989
YAR030C	47.139	55.2298	41.7451	0.755843	-0.403842	0.263473	0.584136
YAR031W	665.591	657.463	671.009	1.0206	0.0294233	0.905271	0.988343
YAR033W	413.816	445.517	392.681	0.881407	-0.18212	0.480136	0.773759
YAR035W	9534.16	11914.5	7947.27	0.667025	-0.584187	0.0732353	0.309926
YAR035C-A	10.128	18.6748	4.43012	0.237225	-2.07567	0.00173198	0.0346863
YAR042W	1317.53	1464.79	1219.36	0.832448	-0.264567	0.316432	0.633697
YAR047C	0	0	0	NA	NA	NA	NA
YAR050W	1146.97	1213.38	1102.69	0.908776	-0.138004	0.5921	0.846453
YAR053W	22.6542	21.8851	23.167	1.05858	0.082124	0.977848	1
YAR060C	24.8467	30.3097	21.2046	0.699598	-0.515402	0.229018	0.554286
YAR064W	60.8635	63.2427	59.2774	0.9373	-0.0934169	0.810813	0.953138
YAR066W	99.5698	99.2075	99.8113	1.00609	0.00875426	0.99541	1
YAR068W	126.348	140.771	116.733	0.829238	-0.270142	0.37738	0.692699
YAR069C	54.9396	60.8559	50.9954	0.83797	-0.25503	0.505696	0.793866
YAR070C	89.2554	92.285	87.2356	0.945284	-0.0811805	0.867857	0.975194
YAR071W	460.567	592.557	372.573	0.628755	-0.66943	0.0128474	0.118953
YAR073W	592.913	172.342	873.293	5.06722	2.3412	0.0313879	0.196858
YAR075W	250.832	71.4872	370.396	5.18129	2.37331	0.0245053	0.171168
Q0010	0	0	0	NA	NA	NA	NA
Q0017	0	0	0	NA	NA	NA	NA
Q0032	0	0	0	NA	NA	NA	NA
Q0045	137.471	131.109	141.712	1.08087	0.112195	0.675078	0.89332
Q0070	0	0	0	NA	NA	NA	NA
Q0065	0	0	0	NA	NA	NA	NA
Q0060	0	0	0	NA	NA	NA	NA
Q0055	0	0	0	NA	NA	NA	NA
Q0050	0	0	0	NA	NA	NA	NA
Q0075	0	0	0	NA	NA	NA	NA
Q0080	0	0	0	NA	NA	NA	NA
Q0085	11.7142	5.24329	16.0281	3.05689	1.61206	0.0178157	0.144123
Q0092	0	0	0	NA	NA	NA	NA
Q0105	37.9503	38.5574	37.5456	0.973756	-0.0383673	0.976797	1
Q0120	0	0	0	NA	NA	NA	NA
Q0115	0	0	0	NA	NA	NA	NA
Q0110	0	0	0	NA	NA	NA	NA
Q0130	118.958	98.1492	132.831	1.35336	0.436541	0.265953	0.586286
Q0140	0	0	0	NA	NA	NA	NA
Q0142	0	0	0	NA	NA	NA	NA
Q0143	0	0	0	NA	NA	NA	NA
Q0144	0	0	0	NA	NA	NA	NA
Q0160	3.90149	3.47569	4.18536	1.20418	0.268053	0.949584	1
Q0182	0.223885	0.559713	0	0	#NAME?	0.789263	0.942299
Q0250	122.17	110.727	129.8	1.17225	0.229284	0.47532	0.772113
Q0255	1.55294	1.03097	1.90092	1.84383	0.882704	0.791906	0.942864
Q0275	119.073	97.8243	133.239	1.36202	0.445748	0.274962	0.594988
Q0297	2.35023	3.56415	1.54096	0.43235	-1.20973	0.439517	0.742772
YER054C	2941.06	3205.66	2764.66	0.86243	-0.213521	0.423467	0.731146
YER114C	876.319	911.809	852.659	0.935129	-0.096763	0.718054	0.913487
YER169W	2038.39	2612.69	1655.53	0.633649	-0.658243	0.0116915	0.112911
YEL077C	2172.59	2388.53	2028.64	0.849327	-0.235607	0.379179	0.694544
YEL077W-A	0	0	0	NA	NA	NA	NA
YEL076C-A	13.4773	8.63051	16.7084	1.93597	0.953057	0.135636	0.426398
YEL076C	0	0	0	NA	NA	NA	NA
YEL075W-A	21.1144	17.9977	23.1923	1.28863	0.365836	0.508095	0.795421
YEL075C	5.32886	5.53762	5.18969	0.93717	-0.0936176	0.985186	1
YEL074W	33.2266	39.5	29.0444	0.735303	-0.443589	0.276038	0.596124
YEL073C	400.91	374.178	418.731	1.11907	0.162301	0.613506	0.858752
YEL072W	187.721	261.568	138.49	0.52946	-0.917406	0.00150187	0.0317791
YEL071W	6835.02	7374.15	6475.59	0.878148	-0.187464	0.421558	0.729456
YEL070W	3631.52	2926.31	4101.66	1.40165	0.487129	0.0914332	0.3478
YEL069C	607.165	427.735	726.786	1.69915	0.764814	0.0297664	0.192018
YEL068C	213.039	213.585	212.675	0.995739	-0.00616098	0.993641	1
YEL067C	90.3967	97.4688	85.682	0.879071	-0.185949	0.574591	0.838962
YEL066W	353.071	251.613	420.709	1.67205	0.741614	0.0278208	0.185358
YEL065W	560.274	838.138	375.032	0.447459	-1.16017	0.0909265	0.347446
YEL064C	300.697	340.236	274.337	0.806314	-0.310586	0.494267	0.785628
YEL063C	2316.14	2694.01	2064.23	0.76623	-0.384151	0.244426	0.568276
YEL062W	310.581	327.11	299.561	0.91578	-0.126927	0.657973	0.880369
YEL061C	188.012	147.311	215.146	1.46049	0.546454	0.0627916	0.285241
YEL060C	49911.7	51486.2	48862.1	0.949031	-0.0754722	0.759891	0.929207
YEL059C-A	268.415	253.204	278.555	1.10012	0.137664	0.622223	0.861825
YEL059W	116.884	122.037	113.448	0.929625	-0.105279	0.769176	0.932583
YEL058W	2981.44	3300.11	2768.99	0.839061	-0.253152	0.372047	0.687952
YEL057C	617.023	594.936	631.748	1.06188	0.0866155	0.894972	0.984874
YEL056W	1015.45	1152.37	924.165	0.801972	-0.318377	0.21823	0.542915
YEL055C	540.787	548.525	535.629	0.976489	-0.0343236	0.880313	0.980171
YEL054C	1202.94	833.198	1449.43	1.7396	0.798754	0.00519844	0.0710927
YEL053W-A	4.47088	5.06636	4.07389	0.804105	-0.314544	0.853811	0.96985
YEL053C	287.154	245.664	314.814	1.28148	0.357815	0.307508	0.625219
YEL052W	1371.76	1460.58	1312.54	0.898639	-0.154187	0.556868	0.827027
YEL051W	1772.04	1738.84	1794.18	1.03182	0.0451937	0.874342	0.979454
YEL050W-A	95.9643	89.1359	100.517	1.12768	0.173356	0.732021	0.916565
YEL050C	959.139	716.821	1120.68	1.56341	0.644693	0.0411879	0.229073
YEL049W	197.57	277.326	144.398	0.52068	-0.941531	0.00101279	0.0239238
YEL048C	62.5533	61.4429	63.2935	1.03012	0.0428101	1	1
YEL047C	2113.75	1958.48	2217.26	1.13213	0.179041	0.541427	0.817362
YEL046C	3555.68	4528.77	2906.96	0.641887	-0.639609	0.263094	0.583894
YEL045C	26.1841	25.9494	26.3406	1.01507	0.0215839	0.967396	1
YEL044W	1377.54	1851.62	1061.49	0.573276	-0.802699	0.00214498	0.0406232
YEL043W	802.126	729.532	850.521	1.16584	0.221375	0.444858	0.747447
YEL042W	761.603	619.745	856.175	1.3815	0.466231	0.0966506	0.357338
YEL041W	583.835	593.197	577.593	0.973694	-0.0384595	0.937481	0.997187
YEL040W	240.393	187.074	275.938	1.47502	0.560734	0.150492	0.44965
YEL039C	4491.1	7380.41	2564.9	0.347529	-1.5248	9.47125e-09	1.70903e-06
YEL038W	1029.68	1398.94	783.5	0.560066	-0.836332	0.00140721	0.0306753
YEL037C	1954.48	1785.12	2067.39	1.15812	0.211789	0.444795	0.747447
YEL036C	829.184	808.952	842.672	1.04168	0.0589167	0.79543	0.945665
YEL035C	64.7719	86.0719	50.572	0.587555	-0.767205	0.0405907	0.227316
YEL034C-A	1690.24	1855.58	1580.01	0.851489	-0.23194	0.615676	0.859487
YEL034W	0	0	0	NA	NA	NA	NA
YEL033W	782.555	884.557	714.554	0.807811	-0.307911	0.408833	0.718167
YEL032W	591.18	524.065	635.923	1.21344	0.279106	0.576159	0.840118
YEL032C-A	0	0	0	NA	NA	NA	NA
YEL031W	1209.82	955.026	1379.69	1.44466	0.530733	0.0461601	0.244089
YEL030C-A	5.29535	3.65261	6.39051	1.74957	0.807004	0.412368	0.721262
YEL030W	587.103	782.071	457.123	0.584503	-0.774717	0.0305267	0.194184
YEL029C	277.823	355.26	226.199	0.636714	-0.651283	0.066531	0.294503
YEL028W	137.854	182.712	107.948	0.590807	-0.759241	0.0102723	0.106935
YEL027W	6725.73	7578.4	6157.28	0.812478	-0.2996	0.258852	0.581019
YEL026W	447.564	216.59	601.547	2.77736	1.47372	3.58157e-05	0.00193545
YEL025C	861.44	970.19	788.94	0.813181	-0.298352	0.265129	0.58589
YEL024W	6366.48	6867.53	6032.44	0.878399	-0.187051	0.508311	0.795421
YEL023C	205.606	195.965	212.033	1.08199	0.113691	0.807007	0.951508
YEL022W	272.005	209.194	313.879	1.50042	0.585364	0.0510048	0.25526
YEL021W	16182.1	30926.4	6352.65	0.205412	-2.28341	8.35047e-07	8.47573e-05
YEL020C-B	70.2014	57.4108	78.7284	1.37132	0.455564	0.175675	0.486439
YEL020W-A	151.751	129.019	166.906	1.29366	0.371455	0.217952	0.542459
YEL020C	946.889	1066.44	867.189	0.813163	-0.298383	0.300313	0.617599
YEL019C	65.9809	43.4469	81.0036	1.86443	0.898734	0.0287589	0.188553
YEL018C-A	2.01066	2.06193	1.97648	0.958557	-0.0610638	1	1
YEL018W	125.55	112.168	134.471	1.19884	0.261642	0.427561	0.733995
YEL017C-A	2139.9	1801.29	2365.64	1.31331	0.393204	0.432582	0.738516
YEL017W	447.185	412.59	470.248	1.13974	0.18871	0.479411	0.773577
YEL016C	340.519	329.402	347.929	1.05625	0.0789447	0.811327	0.953569
YEL015W	1056.77	979.948	1107.99	1.13066	0.177162	0.493213	0.784695
YEL014C	26.7083	25.6857	27.39	1.06635	0.0926865	0.89415	0.984874
YEL013W	1596.99	1684.89	1538.39	0.913052	-0.131231	0.634925	0.869626
YEL012W	3611.35	4315.23	3142.09	0.728141	-0.457711	0.0784224	0.321611
YEL011W	30224.5	35265.3	26864	0.761769	-0.392575	0.265915	0.586286
YEL010W	2.89418	1.41376	3.88113	2.74526	1.45694	0.384182	0.699755
YEL009C-A	5.04618	3.18136	6.28939	1.97695	0.98328	0.350968	0.667806
YEL009C	23095.4	21367.6	24247.2	1.13477	0.182397	0.509909	0.79586
YEL008W	24.3687	22.4158	25.6707	1.1452	0.195601	0.740962	0.922439
YEL008C-A	0	0	0	NA	NA	NA	NA
YEL007W	1709.82	1676.1	1732.31	1.03354	0.04759	0.82678	0.958871
YEL006W	753.811	830.885	702.428	0.845397	-0.242298	0.349901	0.666683
YEL005C	867.267	1069.94	732.154	0.684296	-0.547308	0.0421157	0.232367
YEL004W	274.616	278.184	272.237	0.978624	-0.0311741	0.929638	0.993898
YEL003W	242.162	210.873	263.021	1.2473	0.318804	0.309365	0.625934
YEL002C	1375.7	1129.34	1539.94	1.36357	0.447389	0.0972588	0.359037
YEL001C	445.359	341.45	514.631	1.50719	0.591862	0.0360025	0.212483
YER001W	756.054	523.807	910.884	1.73897	0.798231	0.0183552	0.145411
YER002W	981.096	876.536	1050.8	1.19881	0.261607	0.385317	0.700941
YER003C	841.078	446.847	1103.9	2.47042	1.30475	0.0674102	0.296678
YER004W	2397.84	2293.63	2467.31	1.07572	0.105303	0.699828	0.904732
YER005W	667.051	623.727	695.934	1.11577	0.158035	0.567412	0.83335
YER006W	937.101	580.181	1175.05	2.02531	1.01814	0.000537551	0.0150514
YER006C-A	3.33777	2.44472	3.93313	1.60883	0.686009	0.717616	0.91333
YER007W	209.291	201.715	214.341	1.06259	0.0875871	0.787445	0.942172
YER007C-A	421.964	318.446	490.976	1.54179	0.624604	0.0292448	0.190164
YER008C	796.509	785.151	804.08	1.02411	0.0343685	0.910024	0.98939
YER009W	1175.12	802.34	1423.64	1.77436	0.827299	0.00285565	0.0480578
YER010C	1090.27	1168.11	1038.38	0.888945	-0.169833	0.526792	0.807275
YER011W	65.3438	55.3167	72.0285	1.30211	0.380854	0.474876	0.771584
YER012W	2022.8	2067.19	1993.2	0.964205	-0.0525885	0.871227	0.977797
YER013W	418.912	433.621	409.106	0.943465	-0.0839595	0.750588	0.926433
YER014W	530.9	466.229	574.013	1.23118	0.300043	0.278486	0.597324
YER014C-A	38.4182	33.4026	41.762	1.25026	0.322229	0.48208	0.775723
YER015W	1184.31	1400.59	1040.12	0.742633	-0.429279	0.0930802	0.350734
YER016W	249.257	190.815	288.218	1.51045	0.594981	0.0398626	0.224781
YER017C	2402.86	2598.82	2272.22	0.874329	-0.193752	0.458904	0.761658
YER018C	559.936	547.082	568.505	1.03916	0.0554152	0.856167	0.971028
YER019W	778.935	764.587	788.5	1.03128	0.0444303	0.864107	0.974352
YER019C-A	1865.87	1965.27	1799.61	0.915704	-0.127047	0.637397	0.870775
YER020W	8835.43	9566.49	8348.05	0.872635	-0.19655	0.465678	0.764479
YER021W	2855.71	2773.35	2910.62	1.04949	0.0696943	0.832387	0.961961
YER022W	376.966	355.094	391.547	1.10266	0.140982	0.588289	0.845961
YER023W	1191.97	1024.97	1303.31	1.27155	0.346593	0.203716	0.526807
YER023C-A	0	0	0	NA	NA	NA	NA
YER024W	13771.3	17940.1	10992.1	0.612712	-0.70672	0.140406	0.432577
YER025W	1817.8	1354.49	2126.67	1.57008	0.650842	0.0177772	0.143991
YER026C	2067.81	1785.05	2256.32	1.26401	0.338006	0.427262	0.73387
YER027C	859.229	875.756	848.211	0.968548	-0.0461047	0.879103	0.980171
YER028C	123.999	123.714	124.189	1.00383	0.00552092	1	1
YER029C	522.054	477.252	551.922	1.15646	0.209713	0.421208	0.729256
YER030W	1091.82	1129.64	1066.6	0.944195	-0.0828427	0.747376	0.925458
YER031C	662.265	533.215	748.298	1.40337	0.488897	0.0703198	0.302916
YER032W	212.115	157.738	248.366	1.57455	0.654943	0.0253113	0.17496
YER033C	695.195	737.875	666.742	0.903597	-0.146248	0.591519	0.846453
YER034W	293.713	292.879	294.269	1.00475	0.00682956	1	1
YER035W	2285.66	3067.46	1764.46	0.57522	-0.797815	0.00241692	0.0430146
YER036C	1928.13	1874.11	1964.14	1.04804	0.067694	0.839093	0.963029
YER037W	1188.39	1304.51	1110.99	0.851653	-0.231663	0.534052	0.81249
YER038C	210.063	220.742	202.944	0.919371	-0.121281	0.634046	0.869341
YER038W-A	1.5847	3.47569	0.324049	0.0932332	-3.42301	0.0769658	0.318855
YER039C	165.809	227.809	124.476	0.546403	-0.871962	0.00267009	0.045765
YER039C-A	64.7192	79.677	54.7473	0.687115	-0.541376	0.102272	0.367907
YER040W	666.549	923.864	495.006	0.5358	-0.900235	0.019949	0.152817
YER041W	402.127	401.568	402.5	1.00232	0.00334547	0.974145	1
YER042W	1052.93	1536.62	730.467	0.475372	-1.07287	3.48358e-05	0.00191774
YER043C	3859.49	1755.57	5262.11	2.99738	1.5837	0.0170416	0.140095
YER044C	3226.33	4013.31	2701.68	0.67318	-0.570937	0.0500959	0.253247
YER044C-A	63.3891	35.1702	82.2016	2.33725	1.22481	0.000968813	0.0229686
YER045C	3290.86	3253.21	3315.95	1.01929	0.0275597	0.919197	0.991326
YER046W	768.725	749.825	781.326	1.04201	0.0593694	0.819755	0.957241
YER046W-A	12.5515	15.2586	10.7468	0.704311	-0.505716	0.461533	0.762989
YER047C	916.878	1155.49	757.801	0.655825	-0.608617	0.0216212	0.16015
YER048C	1922.43	2059.01	1831.38	0.88945	-0.169014	0.515286	0.799637
YER048W-A	543.882	530.678	552.684	1.04147	0.0586171	0.846165	0.967346
YER049W	417.275	341.129	468.039	1.37203	0.456313	0.104188	0.371645
YER050C	998.815	926.037	1047.33	1.13099	0.177581	0.548079	0.821187
YER051W	565.99	649.703	510.182	0.785255	-0.348767	0.170854	0.481468
YER052C	1716.18	2596.11	1129.56	0.435099	-1.20058	0.000374705	0.0118159
YER053C	12591.4	17470	9338.92	0.534569	-0.903552	0.0967516	0.357508
YER053C-A	3267.12	5211.17	1971.09	0.378243	-1.40262	8.80503e-08	1.21697e-05
YER055C	1697.18	2303.86	1292.73	0.561114	-0.833634	0.00138896	0.0303793
YER056C	3130.86	3378.53	2965.75	0.877822	-0.188	0.545571	0.82085
YER056C-A	1846.92	1620.24	1998.04	1.23318	0.302382	0.383312	0.699044
YER057C	1962.74	1976.12	1953.82	0.988715	-0.0163733	0.945114	1
YER058W	271.957	279.628	266.843	0.954278	-0.0675179	0.806117	0.951406
YER059W	792.329	879.622	734.133	0.8346	-0.260843	0.344265	0.662828
YER060W	939.488	885.67	975.367	1.10128	0.139177	0.651623	0.877048
YER060W-A	640.747	648.463	635.604	0.98017	-0.0288955	0.856112	0.971028
YER061C	1226	1077.4	1325.07	1.22988	0.298514	0.283151	0.601525
YER062C	569.171	476.735	630.794	1.32315	0.403981	0.184909	0.500486
YER063W	2704.68	3294.26	2311.62	0.701713	-0.511048	0.0561991	0.270337
YER064C	1115.59	828.709	1306.85	1.57697	0.657155	0.235766	0.560995
YER065C	15145.2	19407.7	12303.5	0.633946	-0.657567	0.196059	0.515708
YER066W	1016.79	1150.61	927.576	0.806157	-0.310867	0.243241	0.567583
YER066C-A	3980.86	4878.46	3382.47	0.693347	-0.528351	0.263192	0.583912
YER067W	3350.31	4129.25	2831.01	0.685599	-0.544562	0.307094	0.624766
YER067C-A	237.512	313.241	187.025	0.597064	-0.744042	0.121221	0.40279
YER068W	788.454	829.431	761.136	0.917659	-0.123969	0.71344	0.910434
YER068C-A	60.1899	105.771	29.8023	0.281762	-1.82745	0.0624787	0.284811
YER069W	4942.77	8735.08	2414.57	0.276422	-1.85505	0.05125	0.256092
YER070W	470.316	172.17	669.081	3.88617	1.95835	0.0204599	0.15518
YER071C	175.134	168.99	179.231	1.0606	0.0848828	0.746533	0.924767
YER072W	1707.18	2198.67	1379.51	0.627431	-0.672472	0.0112001	0.111118
YER073W	4016.88	7718.54	1549.11	0.2007	-2.31689	3.02094e-07	3.70265e-05
YER074W	4677.97	3416.2	5519.16	1.61559	0.692058	0.0223065	0.162729
YER074W-A	585.455	555.13	605.672	1.09104	0.125709	0.643327	0.873085
YER075C	387.349	345.452	415.28	1.20213	0.265598	0.392045	0.705715
YER076C	247.32	267.078	234.148	0.876703	-0.18984	0.528373	0.808629
YER076W-A	32.5645	33.0488	32.2416	0.975575	-0.0356754	0.910451	0.98939
YER077C	474.413	403.873	521.44	1.2911	0.3686	0.193214	0.512084
YER078C	679.267	717.045	654.082	0.912191	-0.132593	0.604972	0.854037
YER078W-A	10.9935	11.7234	10.5069	0.896236	-0.15805	0.836137	0.962297
YER079W	3361.91	4053.52	2900.83	0.715631	-0.482712	0.0676355	0.296865
YER079C-A	18.467	19.0286	18.0925	0.950806	-0.0727773	0.92481	0.992106
YER080W	1372.35	1453.05	1318.55	0.907436	-0.140133	0.607835	0.855023
YER081W	5398.97	2497.7	7333.14	2.93595	1.55383	0.00259709	0.0450459
YER082C	653.241	702.263	620.56	0.883658	-0.178439	0.523722	0.804654
YER083C	1538.5	1520.75	1550.34	1.01945	0.0277964	0.911512	0.989999
YER084W	909.655	1216.21	705.285	0.579904	-0.786114	0.00357701	0.0565359
YER084W-A	4.72593	4.68357	4.75417	1.01507	0.0215839	1	1
YER085C	1.74368	1.50222	1.90465	1.26789	0.342434	1	1
YER086W	2480.26	2982.82	2145.21	0.719188	-0.47556	0.294455	0.611516
YER087W	270.264	231.086	296.384	1.28257	0.359037	0.207096	0.531109
YER087C-A	16.7596	15.0222	17.9179	1.19276	0.254305	0.721449	0.914729
YER087C-B	510.018	400.688	582.904	1.45476	0.540778	0.163131	0.470978
YER088C	5479.19	6649.54	4698.96	0.70666	-0.500912	0.0608408	0.281845
YER088C-A	186.682	211.319	170.257	0.805687	-0.311709	0.306438	0.624766
YER088W-B	0	0	0	NA	NA	NA	NA
YER089C	1416.35	1508.44	1354.96	0.898256	-0.154801	0.558676	0.828349
YER090W	1924.37	2677.16	1422.5	0.531348	-0.912271	0.0186398	0.146744
YER090C-A	0	0	0	NA	NA	NA	NA
YER091C	13449.5	23862.3	6507.62	0.272716	-1.87453	0.0106637	0.107941
YER091C-A	1.37442	1.41376	1.3482	0.95363	-0.0684988	1	1
YER092W	207.856	260.297	172.895	0.664222	-0.590263	0.0413988	0.229852
YER093C	399.304	389.201	406.039	1.04326	0.0611023	0.8678	0.975194
YER093C-A	337.63	299.774	362.867	1.21047	0.275564	0.326737	0.643622
YER094C	2359.23	2566.18	2221.27	0.865595	-0.208235	0.447804	0.750112
YER095W	1268.97	711.054	1640.92	2.30773	1.20647	0.0335259	0.202958
YER096W	519.65	753.845	363.521	0.482222	-1.05223	0.0263625	0.178474
YER097W	17.874	17.5264	18.1057	1.03305	0.0469157	0.946457	1
YER098W	779.859	781.211	778.958	0.997116	-0.00416718	0.989591	1
YER099C	1524.34	1663.21	1431.77	0.860847	-0.216171	0.414634	0.72366
YER100W	1205.69	1165.75	1232.31	1.0571	0.0801149	0.783698	0.940768
YER101C	1093.54	1290.39	962.307	0.74575	-0.423236	0.111882	0.385338
YER102W	9967.83	6996.69	11948.6	1.70775	0.772095	0.0176303	0.143053
YER103W	11863.7	9094.99	13709.5	1.50737	0.592029	0.605643	0.85414
YER104W	431.85	489.996	393.086	0.802222	-0.317926	0.239205	0.564143
YER105C	818.878	808.003	826.128	1.02243	0.0320039	0.946518	1
YER106W	54.7297	44.0645	61.8398	1.40339	0.48892	0.479413	0.773577
YER107C	338.754	315.472	354.275	1.123	0.167358	0.560223	0.828752
YER107W-A	18.6467	16.0242	20.3951	1.27277	0.347968	0.502619	0.792287
YER109C	278.393	228.134	311.899	1.36717	0.451194	0.126476	0.412082
YER110C	913.379	803.069	986.918	1.22893	0.297407	0.388955	0.703803
YER111C	300.647	272.408	319.472	1.17277	0.229921	0.423848	0.731275
YER112W	732.052	626.856	802.183	1.27969	0.355798	0.187963	0.505384
YER113C	337.769	299.657	363.177	1.21198	0.27736	0.318032	0.635672
YER115C	653.161	746.362	591.027	0.791877	-0.336652	0.213088	0.538187
YER116C	652.259	730.187	600.307	0.822128	-0.282565	0.291503	0.609464
YER117W	3715.94	3017.23	4181.74	1.38595	0.470878	0.142999	0.436761
YER118C	225.296	148.546	276.463	1.86113	0.896177	0.00371999	0.0572631
YER119C	1169.98	1511.14	942.534	0.623725	-0.681018	0.0108069	0.10884
YER119C-A	138.416	140.592	136.965	0.974199	-0.0377118	0.904496	0.988311
YER120W	2138.76	1905.19	2294.47	1.20433	0.268225	0.29916	0.616348
YER121W	1014.2	1202.12	888.919	0.73946	-0.435456	0.0941746	0.353209
YER122C	1499.46	1368.52	1586.76	1.15947	0.213467	0.427087	0.733762
YER123W	478.543	526.994	446.243	0.846771	-0.239955	0.361106	0.678943
YER124C	1483.82	1037.71	1781.22	1.7165	0.779467	0.00465366	0.0655038
YER125W	3313.61	3472.02	3208.01	0.923961	-0.114096	0.698734	0.903998
YER126C	629.429	436.824	757.832	1.73487	0.794828	0.00557507	0.0741517
YER127W	107.607	77.9689	127.365	1.63353	0.707997	0.0336418	0.202958
YER128W	300.816	383.361	245.785	0.641132	-0.641307	0.0282411	0.186627
YER129W	1099.66	1292	971.433	0.751885	-0.411417	0.123419	0.407176
YER130C	438.908	333.771	508.999	1.525	0.608807	0.0277393	0.185005
YER131W	1815.34	1191.13	2231.47	1.87341	0.905666	0.0036337	0.0567409
YER132C	415.095	365.517	448.147	1.22606	0.294034	0.328308	0.645872
YER133W	4746.28	4951.06	4609.75	0.931064	-0.103047	0.713424	0.910434
YER133W-A	125.774	129.107	123.552	0.956971	-0.0634533	0.879592	0.980171
YER134C	307.33	311.292	304.689	0.978788	-0.0309322	0.916433	0.991019
YER135C	15.3723	12.5775	17.2356	1.37036	0.45455	0.504507	0.793546
YER136W	2909.15	2948.64	2882.83	0.977684	-0.03256	0.919347	0.991326
YER137C	56.5435	64.6532	51.137	0.790943	-0.338354	0.464133	0.763898
YER137W-A	2.37208	3.47569	1.63634	0.470795	-1.08683	0.438758	0.742496
YER138C	14.7425	14.1392	15.1447	1.07112	0.0991182	0.869959	0.976881
YER137C-A	0	0	0	NA	NA	NA	NA
YER138W-A	22.9473	12.489	29.9195	2.39567	1.26043	0.0715343	0.304913
YER139C	253.037	267.958	243.09	0.907197	-0.140512	0.594455	0.847855
YER140W	254.843	252.171	256.625	1.01766	0.0252555	0.92515	0.992106
YER141W	4368.1	4336.83	4388.94	1.01202	0.0172311	0.957993	1
YER142C	1045.05	1189.58	948.706	0.797515	-0.326416	0.204099	0.526963
YER143W	1625.35	1600	1642.24	1.0264	0.0375944	0.887068	0.982577
YER144C	1055.54	961.027	1118.54	1.1639	0.21897	0.39607	0.710408
YER145C	3145.95	3222.25	3095.08	0.960532	-0.0580951	0.792105	0.942919
YER145C-A	67.8081	69.9271	66.3955	0.949496	-0.0747656	0.852798	0.96934
YER146W	45.0232	46.3918	44.1108	0.950831	-0.0727389	0.773062	0.934812
YER147C	611.53	701.955	551.247	0.785302	-0.34868	0.176219	0.48701
YER147C-A	123.55	116.822	128.036	1.09599	0.132231	0.683129	0.895467
YER148W	630.231	626.733	632.563	1.0093	0.0133564	0.968937	1
YER148W-A	2.82506	1.41376	3.76593	2.66378	1.41347	0.491925	0.784321
YER149C	134.097	133.641	134.402	1.00569	0.008187	1	1
YER150W	25137.5	23339.3	26336.3	1.12841	0.17429	0.826908	0.958871
YER151C	746.352	698.256	778.417	1.1148	0.156786	0.565341	0.832379
YER152C	1205.2	1218.34	1196.44	0.982019	-0.0261769	0.968669	1
YER152W-A	11.0998	10.6924	11.3713	1.06349	0.0888115	0.965484	1
YER153C	135.97	136.057	135.912	0.998938	-0.00153249	1	1
YER154W	888.737	612.984	1072.57	1.74976	0.807156	0.0031522	0.0518397
YER155C	1123.89	1008.84	1200.59	1.19007	0.25105	0.358711	0.676789
YER156C	898.506	584.839	1107.62	1.89388	0.921348	0.00472783	0.0661896
YER157W	349.458	407.691	310.635	0.761938	-0.392255	0.161138	0.467091
YER158C	2255.8	1881.61	2505.26	1.33145	0.412996	0.129004	0.416938
YER158W-A	163.56	160.092	165.871	1.0361	0.0511597	0.883033	0.98102
YER159C	1288.5	1356.62	1243.08	0.916309	-0.126093	0.632555	0.868864
YER160C	967.354	765.111	1102.18	1.44055	0.526622	0.0560814	0.270337
YER159C-A	0	0	0	NA	NA	NA	NA
YER161C	853.066	839.4	862.177	1.02713	0.0386257	0.911973	0.990098
YER162C	1030.89	1245.22	888.002	0.713127	-0.487769	0.064255	0.288061
YER163C	669.516	617.932	703.905	1.13913	0.187932	0.480046	0.773759
YER164W	906.267	837.782	951.924	1.13624	0.184271	0.519719	0.802113
YER165W	8147.08	6689.72	9118.65	1.36308	0.446874	0.108042	0.379785
YER165C-A	3.72659	1.50222	5.20951	3.46788	1.79405	0.177518	0.489247
YER166W	1205.62	1270.71	1162.22	0.914625	-0.128748	0.636803	0.870145
YER167W	994.478	1005.48	987.141	0.981757	-0.0265616	0.938873	0.997988
YER168C	363.386	363.128	363.559	1.00119	0.00170919	0.96902	1
YER170W	278.066	272.403	281.841	1.03465	0.0491381	0.932315	0.994987
YER171W	357.854	347.492	364.762	1.0497	0.069976	0.836573	0.962297
YER172C	736.088	725.764	742.97	1.02371	0.0338043	0.924667	0.992106
YER172C-A	0.371037	0.471252	0.304228	0.645573	-0.631349	1	1
YER173W	283.552	299.625	272.837	0.910596	-0.135117	0.610782	0.857234
YER174C	1020.73	1594.34	638.322	0.400369	-1.3206	4.8649e-06	0.000355083
YER175C	4384.4	7891.37	2046.42	0.259324	-1.94717	2.63543e-05	0.00154232
YER175W-A	18.0603	15.8762	19.5163	1.22928	0.297811	0.69793	0.903552
YER176W	734.283	1014.38	547.549	0.539784	-0.889546	0.0027806	0.0470108
YER177W	10809.6	9907.17	11411.3	1.15182	0.203913	0.416908	0.725571
YER178W	12881.7	16005.5	10799.2	0.674719	-0.567641	0.0509388	0.25526
YER179W	488.277	224.158	664.356	2.96378	1.56744	8.6817e-08	1.21697e-05
YER180C	353.788	399.098	323.582	0.810785	-0.302609	0.277122	0.59685
YER180C-A	72.1339	78.823	67.6745	0.858563	-0.220004	0.491837	0.784321
YER181C	10.2226	12.7254	8.55401	0.672198	-0.573041	0.438023	0.742464
YER182W	2410.99	2550.4	2318.05	0.908898	-0.13781	0.669001	0.889024
YER183C	294.831	268.429	312.433	1.16393	0.219007	0.473239	0.769562
YER184C	419.704	446.926	401.557	0.898487	-0.154431	0.594517	0.847855
YER185W	279.627	333.38	243.793	0.731276	-0.451512	0.372147	0.687952
YER186C	649.944	641.725	655.424	1.02135	0.0304723	0.913257	0.990142
YER187W	316.946	312.968	319.598	1.02118	0.0302425	0.925034	0.992106
YER188W	325.207	289.465	349.034	1.20579	0.269982	0.328258	0.645872
YER188C-A	31.3125	35.0223	28.8393	0.823457	-0.280234	0.466816	0.765381
YER189W	5.48962	3.94694	6.51807	1.65142	0.72371	0.52879	0.808811
YER190W	48.558	52.7545	45.7603	0.86742	-0.205198	0.547009	0.821151
YER190C-A	0	0	0	NA	NA	NA	NA
YER190C-B	0	0	0	NA	NA	NA	NA
YJL091C	395.197	385.75	401.495	1.04082	0.0577169	0.859677	0.972483
YJL026W	5571.98	4999.62	5953.55	1.1908	0.251932	0.345489	0.662828
YJL026C-A	0	0	0	NA	NA	NA	NA
YJR125C	2000.29	2090.95	1939.84	0.927732	-0.10822	0.709573	0.908432
YJL225C	2998.25	3169.26	2884.25	0.91007	-0.13595	0.616672	0.859487
YJL225W-A	0	0	0	NA	NA	NA	NA
YJL223C	79.2661	54.699	95.6442	1.74855	0.806162	0.135744	0.426398
YJL222W-B	14.252	12.1062	15.6825	1.29541	0.373413	0.632774	0.868864
YJL222W-A	6.79202	10.4271	4.36865	0.418972	-1.25507	0.0867778	0.339175
YJL222W	859.631	778.28	913.865	1.17421	0.23169	0.412269	0.721262
YJL221C	700.101	682.295	711.973	1.0435	0.061427	0.867746	0.975194
YJL220W	15.7257	12.2831	18.0207	1.46711	0.552978	0.353867	0.671552
YJL219W	332.918	275.766	371.019	1.34541	0.428048	0.135038	0.426242
YJL218W	72.6735	68.7803	75.269	1.09434	0.13006	0.665003	0.886186
YJL217W	8516.76	9394.06	7931.89	0.844351	-0.244085	0.637795	0.870838
YJL216C	102.51	85.2452	114.02	1.33755	0.419594	0.250979	0.573499
YJL215C	21.7194	20.177	22.7476	1.1274	0.173002	0.785901	0.941615
YJL214W	98.2375	78.2938	111.533	1.42455	0.510505	0.119731	0.399792
YJL213W	251.292	400.688	151.695	0.378585	-1.40131	5.80302e-07	6.38922e-05
YJL212C	468.137	591.386	385.971	0.652655	-0.615607	0.0217889	0.160477
YJL211C	215.068	272.614	176.704	0.648184	-0.625525	0.0288705	0.188675
YJL210W	1508.07	2146.01	1082.78	0.504553	-0.986921	0.00015641	0.00608405
YJL209W	182.063	150.46	203.131	1.35007	0.433035	0.160945	0.46674
YJL208C	160.923	106.485	197.215	1.85204	0.889113	0.00378305	0.0576549
YJL207C	456.149	399.688	493.79	1.23544	0.305024	0.282567	0.601284
YJL206C	599.521	751.131	498.448	0.663596	-0.591623	0.0276932	0.185005
YJL205C	416.142	530.302	340.036	0.641212	-0.641127	0.0423163	0.232367
YJL204C	248.241	220.036	267.044	1.21364	0.279338	0.340548	0.659109
YJL203W	208.82	178.326	229.149	1.285	0.361764	0.217335	0.54196
YJL202C	19.7942	18.1746	20.8739	1.14852	0.199782	0.701104	0.904732
YJL201W	600.567	724.23	518.126	0.715416	-0.483145	0.0689737	0.299347
YJL200C	951.309	765.027	1075.5	1.40583	0.49142	0.451238	0.753533
YJL199C	264.931	362.303	200.016	0.552067	-0.857084	0.00222781	0.0414667
YJL198W	819.789	1012.31	691.443	0.683037	-0.549965	0.264833	0.58589
YJL197W	373.237	339.747	395.563	1.16429	0.219446	0.431163	0.736712
YJL197C-A	0	0	0	NA	NA	NA	NA
YJL196C	453.668	568.226	377.296	0.66399	-0.590766	0.0745541	0.313643
YJL195C	1.79666	3.0929	0.932505	0.301499	-1.72978	0.330555	0.647943
YJL194W	66.1478	71.4904	62.586	0.875446	-0.19191	0.59201	0.846453
YJL193W	149.67	128.161	164.009	1.27971	0.355812	0.279871	0.599223
YJL192C	591.137	513.569	642.849	1.25173	0.323923	0.238445	0.564143
YJL191W	1486.35	1350.46	1576.95	1.16771	0.223684	0.521034	0.803189
YJL190C	1736.46	1105.39	2157.18	1.95152	0.964595	0.00624568	0.0794828
YJL189W	40.2051	31.8409	45.7813	1.43781	0.523878	0.239765	0.564143
YJL188C	356.438	272.548	412.365	1.513	0.597413	0.0494833	0.252759
YJL187C	355.241	228.869	439.49	1.92026	0.941304	0.0147719	0.128803
YJL186W	1147.38	1183.41	1123.36	0.949252	-0.0751364	0.741715	0.922474
YJL185C	859.488	1330.27	545.631	0.410164	-1.28573	1.75028e-06	0.00014766
YJL184W	443.802	548.933	373.715	0.680802	-0.554692	0.0356415	0.211055
YJL183W	531.923	500.251	553.037	1.10552	0.144722	0.590105	0.846453
YJL182C	3.01773	2.53318	3.34077	1.3188	0.399229	0.925116	0.992106
YJL181W	320.261	268.315	354.891	1.32267	0.40345	0.152825	0.453334
YJL180C	451.697	382.223	498.014	1.30294	0.381772	0.181152	0.494871
YJL179W	143.248	130.106	152.009	1.16835	0.224473	0.509848	0.79586
YJL178C	864.896	866.746	863.664	0.996444	-0.00513929	0.987337	1
YJL177W	2680.43	1962.11	3159.3	1.61015	0.687199	0.063104	0.286459
YJL176C	409.468	394.063	419.738	1.06515	0.09106	0.727857	0.915363
YJL175W	0	0	0	NA	NA	NA	NA
YJL174W	3639.56	3710.1	3592.53	0.968311	-0.046458	0.883209	0.98102
YJL173C	399.819	336.148	442.266	1.31569	0.395819	0.270364	0.589555
YJL172W	601.464	617.801	590.573	0.955928	-0.0650257	0.826105	0.958663
YJL171C	3592.27	2874.85	4070.55	1.41591	0.501734	0.0706552	0.303274
YJL170C	418.775	470.852	384.057	0.815664	-0.293953	0.306971	0.624766
YJL169W	16.5417	11.8119	19.695	1.66739	0.737589	0.183593	0.498796
YJL168C	207.514	137.794	253.994	1.84329	0.882282	0.00352549	0.0559941
YJL167W	3852.87	3087.47	4363.14	1.41317	0.498939	0.24582	0.569692
YJL166W	5832.12	6530.04	5366.85	0.82187	-0.283017	0.303254	0.620452
YJL165C	1966.28	1964.79	1967.28	1.00127	0.00182804	0.993833	1
YJL164C	1865.71	2301.75	1575.02	0.684271	-0.54736	0.0395287	0.22387
YJL163C	2472.69	3881.68	1533.36	0.395024	-1.33999	4.00079e-07	4.55949e-05
YJL162C	220.993	217.765	223.145	1.0247	0.0352053	0.971951	1
YJL161W	1819.79	2388.22	1440.84	0.603312	-0.729023	0.0423527	0.232367
YJL160C	171.468	291.893	91.1848	0.312391	-1.67858	0.0982935	0.361151
YJL159W	56010.7	41772.6	65502.7	1.56808	0.648998	0.0176393	0.143053
YJL158C	2994.77	1408.97	4051.97	2.87585	1.52399	0.0250731	0.173829
YJL157C	497.759	280.714	642.456	2.28865	1.1945	0.00426424	0.061576
YJL156W-A	155.285	137.059	167.435	1.22163	0.288807	0.331113	0.648255
YJL156C	870.698	814.633	908.075	1.1147	0.156661	0.554123	0.824836
YJL155C	2786.39	3092.38	2582.39	0.83508	-0.260013	0.342728	0.661033
YJL154C	1352.15	1396.67	1322.47	0.946874	-0.0787558	0.791122	0.942749
YJL153C	1379.16	751.646	1797.5	2.39142	1.25787	0.0561435	0.270337
YJL152W	619.75	656.085	595.527	0.907699	-0.139714	0.689722	0.899622
YJL151C	3859.85	4178.75	3647.25	0.872808	-0.196264	0.490769	0.784072
YJL150W	5.55601	2.82751	7.37502	2.6083	1.38311	0.268157	0.58796
YJL149W	619.984	588.113	641.231	1.09032	0.12475	0.659254	0.881112
YJL148W	242.241	187.306	278.865	1.48882	0.574169	0.130314	0.419296
YJL147C	214.42	210.167	217.256	1.03373	0.0478555	0.903408	0.988311
YJL146W	629.029	631.263	627.539	0.994102	-0.00853438	0.949438	1
YJL145W	257.183	213.407	286.368	1.34189	0.424264	0.147117	0.443055
YJL144W	2157.84	2546.47	1898.76	0.745646	-0.423438	0.11392	0.389896
YJL143W	1137.55	894.485	1299.59	1.45289	0.538923	0.0496317	0.253067
YJL142C	344.495	460.375	267.242	0.580488	-0.784662	0.0239865	0.169735
YJL141C	6810.63	7550.63	6317.31	0.83666	-0.257287	0.326927	0.643746
YJL140W	1462.74	1655.45	1334.26	0.805976	-0.311191	0.233868	0.560182
YJL139C	396.796	373.325	412.443	1.10478	0.143762	0.611445	0.857501
YJL138C	12725.1	9427.73	14923.4	1.58293	0.662595	0.0151314	0.130884
YJL137C	669.281	1027.1	430.737	0.419373	-1.25369	0.0208198	0.156716
YJL136W-A	2.16374	1.50222	2.60475	1.73394	0.794054	0.762533	0.929207
YJL136C	1934.4	1491.43	2229.72	1.49502	0.58016	0.0460249	0.243919
YJL135W	21.2771	25.8031	18.2597	0.707657	-0.498878	0.271353	0.589928
YJL134W	575.781	593.157	564.197	0.951176	-0.0722156	0.811651	0.953611
YJL133C-A	6649.84	7033.2	6394.27	0.909155	-0.137402	0.549085	0.821187
YJL133W	2013.01	2226.24	1870.85	0.84036	-0.250921	0.371362	0.687677
YJL132W	2529.25	3269.6	2035.69	0.622612	-0.683596	0.0106564	0.107941
YJL131C	552.893	561.818	546.942	0.973522	-0.0387148	0.903804	0.988311
YJL130C	6734.65	6079.58	7171.37	1.17958	0.238278	0.564151	0.832099
YJL129C	893.878	850.897	922.532	1.08419	0.116615	0.647564	0.876292
YJL128C	1258.93	1296.56	1233.84	0.951626	-0.0715335	0.778806	0.937917
YJL127W-A	31.6361	31.2522	31.892	1.02047	0.0292334	1	1
YJL127C-B	470.08	591.946	388.836	0.656878	-0.606303	0.0259098	0.176752
YJL127C	212.599	212.7	212.532	0.999206	-0.0011455	0.967977	1
YJL126W	385.311	347.019	410.84	1.18391	0.243562	0.430674	0.73642
YJL125C	420.566	368.548	455.245	1.23524	0.304789	0.308503	0.625576
YJL124C	632.733	477.099	736.489	1.54368	0.626377	0.0239406	0.169735
YJL123C	2306.81	2379.4	2258.41	0.949152	-0.0752895	0.788597	0.942299
YJL122W	282.057	182.24	348.602	1.91288	0.935743	0.00233254	0.0420893
YJL121C	803.279	687.732	880.31	1.28002	0.356165	0.196527	0.515793
YJL120W	7.29015	3.65261	9.71519	2.65979	1.41131	0.0944346	0.353572
YJL119C	2.56822	1.97347	2.96472	1.50229	0.58716	0.850733	0.96853
YJL118W	43.018	28.7191	52.5507	1.82982	0.871702	0.0590889	0.277744
YJL117W	927.485	1032.25	857.644	0.830853	-0.267335	0.311666	0.628556
YJL116C	3153.84	3166.31	3145.53	0.993438	-0.00949788	0.917938	0.991178
YJL115W	402.656	346.015	440.416	1.27282	0.348032	0.223387	0.548292
YJL114W	22.8357	20.7078	24.2544	1.17127	0.228073	0.653014	0.877711
YJL113W	402.219	387.374	412.115	1.06387	0.0893184	0.782845	0.940637
YJL112W	1495.02	1946.63	1193.96	0.613346	-0.705228	0.00725217	0.0867589
YJL111W	1489.2	1360.59	1574.94	1.15754	0.211066	0.420229	0.728313
YJL110C	631.268	601.39	651.186	1.0828	0.114769	0.725281	0.915237
YJL109C	665.099	510.493	768.169	1.50476	0.589532	0.0400419	0.225205
YJL108C	138.646	107.719	159.264	1.47851	0.564146	0.441317	0.745009
YJL107C	75.2793	58.3517	86.5645	1.4835	0.569001	0.543577	0.819253
YJL106W	287.224	225.778	328.188	1.45359	0.539617	0.0625811	0.284811
YJL105W	147.167	153.228	143.126	0.934071	-0.0983951	0.69674	0.903126
YJL104W	358.663	248.31	432.232	1.7407	0.799666	0.00670671	0.0833093
YJL103C	1272.65	1460.38	1147.5	0.785754	-0.34785	0.196577	0.515793
YJL102W	438.098	327.765	511.653	1.56104	0.642504	0.238223	0.564143
YJL101C	2159.11	2518.9	1919.25	0.761938	-0.392255	0.132131	0.421155
YJL100W	1384.02	1679.89	1186.77	0.706456	-0.501329	0.0567172	0.271866
YJL099W	926.23	1093	815.05	0.745699	-0.423335	0.115717	0.3938
YJL098W	680.999	674.716	685.188	1.01552	0.0222199	0.963156	1
YJL097W	520.656	463.281	558.906	1.20641	0.270716	0.31973	0.637011
YJL096W	593.184	479.075	669.256	1.39697	0.482306	0.0835829	0.332693
YJL095W	378.452	338.301	405.22	1.19781	0.260395	0.367181	0.682658
YJL094C	1191.73	1162.53	1211.2	1.04186	0.0591676	0.838307	0.962297
YJL093C	1084.18	1224.19	990.836	0.809379	-0.305112	0.258764	0.581019
YJL092W	464.591	414.713	497.842	1.20045	0.263574	0.318485	0.635796
YJL090C	395.451	390.171	398.972	1.02256	0.0321789	0.908317	0.98934
YJL089W	1229.51	1804.91	845.908	0.468671	-1.09335	0.000277458	0.00974091
YJL088W	2313.26	4220.46	1041.8	0.246844	-2.01833	0.0751136	0.314651
YJL087C	224.37	267.692	195.488	0.730272	-0.453493	0.0997256	0.363571
YJL086C	6.2361	7.12829	5.6413	0.791395	-0.33753	0.707738	0.907836
YJL085W	329.8	383.459	294.028	0.766776	-0.383122	0.179381	0.491588
YJL084C	1133.91	1337.71	998.04	0.746079	-0.4226	0.106275	0.376013
YJL083W	506.988	527.737	493.156	0.934474	-0.0977732	0.742106	0.922474
YJL082W	2269.79	2135.16	2359.55	1.10509	0.144162	0.57921	0.841612
YJL081C	878.617	886.948	873.063	0.984344	-0.0227649	0.919669	0.991326
YJL080C	795.727	430.376	1039.29	2.41486	1.27194	0.00460845	0.0653635
YJL079C	4703.77	4754.45	4669.98	0.982233	-0.0258631	0.905056	0.988311
YJL078C	2347.59	2077.01	2527.97	1.21712	0.283476	0.311535	0.628488
YJL077W-B	38.1846	38.0267	38.2899	1.00692	0.00995271	0.978242	1
YJL077C	254.164	320.804	209.737	0.653787	-0.613108	0.0300469	0.193291
YJL077W-A	0	0	0	NA	NA	NA	NA
YJL076W	650.589	702.338	616.089	0.877198	-0.189026	0.458498	0.761643
YJL075C	10.723	10.8983	10.606	0.973182	-0.0392183	0.921698	0.991879
YJL074C	174.462	103.241	221.942	2.14974	1.10416	0.000436685	0.013194
YJL073W	344.912	285.571	384.473	1.34633	0.429032	0.25153	0.573499
YJL072C	220.774	251.015	200.613	0.799207	-0.323359	0.433548	0.739776
YJL071W	705.976	1067.39	465.033	0.435673	-1.19868	0.031468	0.196858
YJL070C	812.528	998.03	688.859	0.690219	-0.534874	0.0478094	0.248655
YJL069C	198.055	188.665	204.316	1.08296	0.114974	0.705409	0.90776
YJL068C	2039.38	2328.37	1846.72	0.793137	-0.334358	0.211927	0.537022
YJL067W	181.741	175.18	186.115	1.06242	0.0873533	0.891321	0.983861
YJL066C	2496.66	2337.29	2602.91	1.11364	0.155286	0.718248	0.913487
YJL065C	146.656	170.843	130.532	0.764049	-0.388262	0.179299	0.491588
YJL064W	1.34095	0.471252	1.92074	4.07583	2.02709	0.524336	0.804654
YJL063C	947.409	763.093	1070.29	1.40256	0.488067	0.0745963	0.313643
YJL062W-A	871.092	703.06	983.113	1.39833	0.483709	0.119239	0.399678
YJL062W	467.7	498.775	446.984	0.896164	-0.158165	0.550451	0.821818
YJL061W	337.321	274.15	379.435	1.38404	0.468887	0.0894087	0.345302
YJL060W	667.3	922.21	497.361	0.539314	-0.890804	0.0401963	0.225878
YJL059W	285.912	314.385	266.93	0.849057	-0.236067	0.405067	0.716518
YJL058C	156.273	145.718	163.309	1.12072	0.164422	0.600622	0.850772
YJL057C	1170.02	1178.5	1164.37	0.988006	-0.0174077	0.978383	1
YJL056C	2910.43	3758.89	2344.79	0.623798	-0.68085	0.0836963	0.33294
YJL055W	2258.54	2859.09	1858.17	0.649916	-0.621674	0.0188856	0.147808
YJL054W	898.856	883.883	908.838	1.02823	0.0401688	0.921815	0.991879
YJL053W	942.602	933.371	948.756	1.01648	0.0235866	0.92412	0.992106
YJL052C-A	4.8798	8.71897	2.32035	0.266126	-1.90982	0.0391063	0.222414
YJL052W	245957	155699	306130	1.96616	0.975383	0.000266602	0.00946366
YJL051W	434.543	322.071	509.524	1.58202	0.661771	0.0228533	0.165318
YJL050W	362.006	267.041	425.315	1.5927	0.671473	0.0241456	0.170448
YJL049W	400.477	388.172	408.681	1.05283	0.0742793	0.814616	0.954473
YJL048C	7434.52	10282.9	5535.57	0.538326	-0.893449	0.000715273	0.0185116
YJL047C-A	7.40079	7.48214	7.34656	0.981881	-0.0263805	1	1
YJL047C	630.228	719.987	570.388	0.792221	-0.336026	0.197007	0.515822
YJL046W	263.768	240.979	278.96	1.15761	0.211154	0.478576	0.773532
YJL045W	1624.85	2170.54	1261.06	0.580992	-0.783411	0.00321769	0.0522553
YJL044C	1015.97	1138.91	934.008	0.82009	-0.286146	0.267752	0.587806
YJL043W	34.0978	38.2921	31.3016	0.817443	-0.290809	0.464148	0.763898
YJL042W	2610.87	2920.12	2404.7	0.823495	-0.280169	0.292696	0.610385
YJL041W	1049.64	941.239	1121.9	1.19194	0.253317	0.342294	0.661033
YJL039C	586.72	510.207	637.728	1.24994	0.321859	0.246417	0.570059
YJL038C	258.714	303.652	228.755	0.753345	-0.408618	0.402072	0.713623
YJL037W	238.083	269.045	217.441	0.808197	-0.30722	0.397023	0.710408
YJL036W	1777.16	1963.51	1652.93	0.841827	-0.248405	0.355333	0.672644
YJL035C	105.007	93.4929	112.683	1.20526	0.269344	0.408704	0.718167
YJL034W	4438.84	2371.65	5816.96	2.45271	1.29437	0.000304769	0.0103114
YJL033W	549.981	434.672	626.853	1.44213	0.528202	0.0730736	0.309443
YJL032W	5.82393	4.12386	6.95732	1.68709	0.754535	0.465628	0.764479
YJL031C	296.927	252.677	326.428	1.29188	0.369472	0.19604	0.515708
YJL030W	390.643	364.931	407.784	1.11743	0.160179	0.576535	0.8402
YJL029C	690.507	713.606	675.108	0.946051	-0.0800099	0.793211	0.94377
YJL028W	8.56463	10.4271	7.32301	0.702308	-0.509824	0.489151	0.78322
YJL027C	19.4268	16.2896	21.5183	1.32099	0.401617	0.415672	0.724787
YJL025W	470.887	792.001	256.811	0.324256	-1.6248	1.64163e-09	3.67725e-07
YJL024C	440.469	498.569	401.736	0.805779	-0.311544	0.232846	0.55952
YJL023C	540.703	599.51	501.499	0.836514	-0.257538	0.318256	0.635723
YJL022W	2.12239	0.942505	2.90898	3.08644	1.62594	0.444098	0.74741
YJL020C	3083.2	3117.98	3060.01	0.981407	-0.0270759	0.955209	1
YJL020W-A	0	0	0	NA	NA	NA	NA
YJL019W	391.761	470.841	339.042	0.720077	-0.473776	0.189604	0.506256
YJL016W	2717.7	3429.92	2242.88	0.653916	-0.612822	0.0175762	0.142898
YJL015C	50.9114	63.5966	42.4546	0.667562	-0.583027	0.124892	0.41016
YJL014W	1208.16	1010.49	1339.94	1.32603	0.407109	0.136383	0.427482
YJL013C	451.925	399.746	486.71	1.21755	0.28398	0.301834	0.619112
YJL012C	978.764	846.474	1066.96	1.26047	0.333965	0.217762	0.542192
YJL011C	34.8434	24.3604	41.8321	1.71722	0.780074	0.0638865	0.2876
YJL010C	201.645	148.723	236.926	1.59307	0.671811	0.0263754	0.178474
YJL009W	65.3262	59.5901	69.1503	1.16043	0.214663	0.568618	0.834053
YJL008C	1042.65	873.932	1155.14	1.32177	0.40247	0.139939	0.432409
YJL007C	4.93442	6.92242	3.60908	0.521361	-0.939644	0.357789	0.675639
YJL006C	203.059	215.293	194.902	0.905289	-0.14355	0.626111	0.863712
YJL005W	2283.14	2622.21	2057.1	0.784492	-0.35017	0.220362	0.544286
YJL004C	537.571	647.765	464.109	0.716478	-0.481006	0.0734115	0.310399
YJL003W	443.826	494.183	410.255	0.830168	-0.268525	0.30878	0.625576
YJL002C	867.924	743.149	951.108	1.27984	0.355958	0.181643	0.495155
YJL001W	1690.27	1709.86	1677.21	0.980905	-0.0278141	0.939475	0.997988
YJR001W	1712.43	1801.39	1653.11	0.917686	-0.123927	0.67913	0.894673
YJR002W	675.864	531.936	771.816	1.45096	0.537004	0.0625654	0.284811
YJR003C	236.294	238.621	234.743	0.983747	-0.023641	0.897315	0.986287
YJR004C	747.359	807.767	707.086	0.87536	-0.192052	0.473061	0.769562
YJR005W	1165.66	862.733	1367.61	1.58521	0.66467	0.0157509	0.134099
YJR005C-A	42.1787	6.36271	66.056	10.3817	3.37598	1.36353e-11	4.66183e-09
YJR006W	363.711	315.146	396.088	1.25684	0.329803	0.25241	0.573862
YJR007W	836.267	690.65	933.345	1.3514	0.434456	0.119966	0.399846
YJR008W	7467.94	8425.1	6829.84	0.810653	-0.302843	0.247438	0.571448
YJR009C	113235	80362.2	135150	1.68176	0.749974	0.0045162	0.0643361
YJR010W	480.516	589.583	407.805	0.691683	-0.531816	0.0463391	0.244286
YJR010C-A	141.086	139.269	142.298	1.02175	0.0310443	0.910382	0.98939
YJR011C	217.311	205.63	225.099	1.09468	0.130506	0.69159	0.900458
YJR012C	218.929	246.869	200.303	0.811375	-0.30156	0.292043	0.609547
YJR013W	326.924	331.467	323.895	0.977154	-0.0333421	0.895426	0.984878
YJR014W	1215.33	1024.09	1342.83	1.31125	0.390938	0.160003	0.466088
YJR015W	909.895	797.435	984.868	1.23505	0.304564	0.249531	0.57297
YJR016C	24272	42975.6	11803	0.274645	-1.86436	5.17392e-08	8.61789e-06
YJR017C	867.214	897.56	846.983	0.94365	-0.0836755	0.77132	0.933658
YJR018W	4.61035	6.56858	3.30486	0.503131	-0.990994	0.294501	0.611516
YJR019C	1032.86	1122.43	973.146	0.867001	-0.205894	0.461098	0.762989
YJR020W	4.77354	5.62608	4.20518	0.747444	-0.419962	0.723954	0.91512
YJR021C	863.269	952.253	803.947	0.844258	-0.244245	0.36253	0.679636
YJR022W	8.78303	8.0708	9.25784	1.14708	0.197964	0.90705	0.988759
YJR023C	13.2124	12.8718	13.4395	1.0441	0.0622643	1	1
YJR024C	563.453	545.839	575.195	1.05378	0.0755759	0.841024	0.963204
YJR025C	4098.67	6056.98	2793.13	0.461142	-1.11672	0.00041458	0.0127635
YJR027W	486.953	382.601	556.522	1.45458	0.540599	0.0531579	0.260418
YJR026W	0	0	0	NA	NA	NA	NA
YJR029W	1241.53	1335.68	1178.77	0.882522	-0.180295	0.510303	0.796093
YJR028W	0	0	0	NA	NA	NA	NA
YJR030C	228.582	237.648	222.538	0.936418	-0.0947755	0.746163	0.924767
YJR031C	250.821	250.787	250.844	1.00023	0.000329847	0.981014	1
YJR032W	198.736	147.103	233.157	1.58499	0.664476	0.0275427	0.184451
YJR033C	830.132	871.523	802.538	0.920846	-0.118968	0.676434	0.893603
YJR034W	447.795	452.212	444.849	0.983718	-0.0236836	0.930454	0.994444
YJR035W	623.445	795.841	508.515	0.638966	-0.646189	0.0148477	0.12916
YJR036C	462.518	596.831	372.976	0.624928	-0.678238	0.0117478	0.113225
YJR037W	12.0009	10.604	12.9321	1.21955	0.286353	0.707023	0.907836
YJR038C	43.1667	55.1414	35.1836	0.638062	-0.648231	0.0789825	0.321933
YJR039W	1060.23	1392.87	838.465	0.601971	-0.732234	0.00572886	0.0751546
YJR040W	323.549	308.876	333.331	1.07917	0.109925	0.69003	0.89965
YJR041C	221.818	166.305	258.827	1.55633	0.638151	0.0377816	0.217386
YJR042W	578.13	483.194	641.421	1.32746	0.408668	0.143228	0.437015
YJR043C	86.7985	60.7674	104.153	1.71395	0.777328	0.0211871	0.158379
YJR044C	1521.6	1673.7	1420.2	0.848537	-0.23695	0.390818	0.705276
YJR045C	15279.6	11685.8	17675.4	1.51255	0.596984	0.206236	0.529739
YJR046W	474.795	509.911	451.384	0.885222	-0.175889	0.503138	0.792336
YJR047C	281.794	120.941	389.03	3.21668	1.68557	0.267926	0.58796
YJR048W	1823.22	1784.66	1848.93	1.03602	0.0510465	0.873022	0.978736
YJR049C	1689.22	1654.84	1712.14	1.03463	0.0491089	0.861207	0.973448
YJR050W	708.267	838.075	621.729	0.741854	-0.430793	0.0977586	0.360204
YJR051W	1416.77	1420.51	1414.28	0.995613	-0.0063424	0.950941	1
YJR052W	640.526	678.14	615.45	0.907556	-0.139941	0.608303	0.855125
YJR053W	91.7378	88.7498	93.7299	1.05611	0.078764	0.865008	0.974419
YJR054W	186.633	151.314	210.179	1.38903	0.474077	0.158365	0.464652
YJR055W	154.737	142.066	163.184	1.14865	0.199942	0.540185	0.816626
YJR056C	296.484	292.965	298.83	1.02002	0.028598	0.97779	1
YJR057W	261.963	231.906	282	1.21601	0.282156	0.342515	0.661033
YJR058C	709.704	935.846	558.942	0.597259	-0.743572	0.00534137	0.0725889
YJR059W	3596.26	4043.83	3297.88	0.815536	-0.29418	0.275592	0.595954
YJR060W	853.685	874.389	839.882	0.960536	-0.0580878	0.80803	0.951508
YJR061W	2723.78	2443.91	2910.36	1.19086	0.252007	0.321857	0.638362
YJR062C	614.586	588.531	631.956	1.07379	0.102705	0.72411	0.91514
YJR063W	84.4046	46.9226	109.393	2.33134	1.22116	0.00058018	0.0158355
YJR064W	1027.04	820.684	1164.62	1.41908	0.504959	0.0608727	0.281845
YJR065C	2841.68	2685.12	2946.06	1.09718	0.1338	0.58512	0.845029
YJR066W	939.32	975.664	915.091	0.937915	-0.0924706	0.705949	0.907836
YJR067C	241.748	246.869	238.334	0.96543	-0.0507564	0.82483	0.958663
YJR068W	629.393	593.743	653.161	1.10007	0.1376	0.62156	0.861298
YJR069C	121.913	90.7539	142.685	1.57222	0.652803	0.0439829	0.237967
YJR070C	919.39	632.615	1110.57	1.75553	0.811904	0.00386255	0.0579472
YJR071W	27.2735	18.6748	33.006	1.76741	0.821638	0.0867534	0.339175
YJR072C	1027.91	881.026	1125.83	1.27786	0.353733	0.214477	0.539478
YJR073C	7068.71	7153.52	7012.17	0.980241	-0.0287919	0.987096	1
YJR074W	520.249	427.136	582.325	1.36332	0.447127	0.110438	0.38279
YJR075W	882.069	819.144	924.018	1.12803	0.173804	0.502892	0.792298
YJR076C	901.564	797.956	970.636	1.2164	0.282622	0.29825	0.616231
YJR077C	8160.88	7332.34	8713.24	1.18833	0.248936	0.407636	0.717617
YJR078W	1830.92	1583.11	1996.13	1.26089	0.334444	0.477852	0.773349
YJR079W	165.57	156.351	171.715	1.09827	0.135229	0.6917	0.900458
YJR080C	314.83	291.353	330.482	1.1343	0.181804	0.513638	0.798702
YJR082C	490.43	505.607	480.312	0.94997	-0.0740462	0.760709	0.929207
YJR083C	413.596	424.7	406.194	0.956427	-0.0642731	0.83459	0.962297
YJR084W	439.934	423.875	450.64	1.06314	0.0883381	0.743363	0.923129
YJR085C	3148.41	3723.85	2764.79	0.742453	-0.429628	0.172268	0.482333
YJR086W	806.855	867.301	766.558	0.883843	-0.178138	0.509553	0.79586
YJR087W	51.3463	47.0416	54.2161	1.15251	0.204785	0.605031	0.854037
YJR088C	470.864	452.182	483.319	1.06886	0.0960736	0.704669	0.90752
YJR089W	433.65	445.316	425.873	0.95634	-0.0644038	0.805257	0.950736
YJR090C	793.699	762.054	814.795	1.06921	0.0965452	0.746873	0.925012
YJR091C	1983.51	2114.11	1896.45	0.897042	-0.156752	0.548608	0.821187
YJR092W	411.002	282.747	496.505	1.75601	0.812299	0.00426558	0.061576
YJR093C	982.526	1115.14	894.115	0.801794	-0.318696	0.230744	0.556183
YJR094C	988.278	1474.2	664.332	0.45064	-1.14995	0.0271908	0.18263
YJR094W-A	1686.27	1191.11	2016.37	1.69284	0.759447	0.00697586	0.0855004
YJR095W	2212.53	3434.11	1398.14	0.407134	-1.29642	0.100061	0.363696
YJR096W	9522.46	11808.9	7998.15	0.677298	-0.562138	0.348989	0.665525
YJR097W	28.7834	17.4669	36.3278	2.07981	1.05645	0.0257306	0.176496
YJR098C	230.369	238.09	225.221	0.945949	-0.080165	0.75251	0.927185
YJR099W	322.762	343.659	308.832	0.898657	-0.154157	0.537625	0.814652
YJR100C	723.153	729.801	718.721	0.984817	-0.0220718	0.92442	0.992106
YJR101W	603.503	438.776	713.321	1.62571	0.701067	0.013881	0.123653
YJR102C	330.441	328.495	331.739	1.00987	0.0141748	0.946425	1
YJR103W	2847.9	2297.37	3214.91	1.39939	0.484795	0.067104	0.295932
YJR104C	31467.2	35413.8	28836.1	0.814261	-0.296436	0.25694	0.578897
YJR105W	1776.7	1349.67	2061.38	1.52731	0.610996	0.227915	0.553472
YJR106W	414.626	343.102	462.309	1.34744	0.430219	0.125083	0.410374
YJR107W	505.105	508.592	502.781	0.988573	-0.0165805	0.978966	1
YJR108W	87.8985	112.964	71.1882	0.630186	-0.666151	0.0426311	0.233304
YJR109C	3524.83	4810.8	2667.51	0.554484	-0.850781	0.10063	0.364377
YJR110W	343.664	340.217	345.962	1.01689	0.0241587	0.935756	0.996971
YJR111C	1208.09	1901.33	745.927	0.392319	-1.3499	0.00945759	0.101607
YJR112W	285.053	387.008	217.083	0.560927	-0.834115	0.128102	0.415246
YJR112W-A	401.323	445.287	372.014	0.835448	-0.259379	0.345597	0.662828
YJR113C	1209.44	1175.81	1231.85	1.04766	0.0671731	0.837332	0.962297
YJR114W	41.7617	53.1663	34.1586	0.642486	-0.638263	0.175307	0.486277
YJR115W	4406.97	5669.11	3565.53	0.62894	-0.669005	0.0100278	0.105747
YJR116W	539.474	431.604	611.388	1.41655	0.502378	0.466027	0.764666
YJR117W	1187.72	1137.43	1221.25	1.07369	0.102575	0.65673	0.879794
YJR118C	283.251	240.419	311.806	1.29693	0.375095	0.190371	0.507657
YJR119C	402.908	517.239	326.687	0.631598	-0.662922	0.01321	0.120353
YJR120W	377.774	316.098	418.891	1.3252	0.406205	0.382397	0.697755
YJR121W	27187.2	23290.3	29785.1	1.27886	0.354861	0.492249	0.784321
YJR122W	624.648	709.677	567.962	0.800311	-0.321368	0.200288	0.520289
YJR123W	9429.13	6688.28	11256.4	1.683	0.751033	0.0358552	0.211934
YJR124C	94.6186	78.1153	105.621	1.35211	0.435217	0.214596	0.539478
YJR126C	1536.54	1777.08	1376.17	0.774398	-0.368852	0.165277	0.474222
YJR127C	1719.96	2031.7	1512.13	0.744266	-0.42611	0.106475	0.376516
YJR128W	41.2224	56.6436	30.9416	0.546252	-0.872363	0.0239308	0.169735
YJR129C	100.436	72.2544	119.223	1.65004	0.722505	0.0329322	0.200871
YJR130C	1597.59	2301.33	1128.44	0.490341	-1.02814	0.0206715	0.15606
YJR131W	423.4	460.833	398.444	0.864616	-0.209869	0.40286	0.714436
YJR132W	477.281	509.117	456.057	0.895782	-0.158781	0.548418	0.821187
YJR133W	592.134	532.686	631.767	1.186	0.246107	0.363512	0.679923
YJR134C	525.385	533.068	520.262	0.975976	-0.0350824	0.912061	0.990098
YJR135C	126.597	124.597	127.93	1.02675	0.0380802	0.9371	0.997187
YJR135W-A	425.365	320.037	495.584	1.54852	0.630892	0.0311841	0.196753
YJR136C	334.123	393.822	294.324	0.747353	-0.420138	0.113995	0.389949
YJR137C	1113.48	1716.22	711.658	0.414666	-1.26998	0.0367458	0.214942
YJR138W	517.645	553.881	493.487	0.890963	-0.166562	0.478426	0.773483
YJR139C	2866.58	3115.34	2700.75	0.866919	-0.206031	0.446746	0.74892
YJR140C	255.365	223.189	276.816	1.24028	0.310663	0.291776	0.609547
YJR140W-A	0	0	0	NA	NA	NA	NA
YJR141W	271.685	275.884	268.886	0.974636	-0.0370643	0.894797	0.984874
YJR142W	674.914	711.136	650.767	0.915109	-0.127985	0.666129	0.886898
YJR143C	649.495	399.212	816.35	2.0449	1.03203	0.000449932	0.0134689
YJR144W	858.267	697.367	965.533	1.38454	0.469409	0.0904336	0.346841
YJR145C	7162.54	4893.05	8675.53	1.77303	0.826218	0.0102983	0.106935
YJR146W	296.998	402.398	226.731	0.563451	-0.827639	0.00228093	0.0419987
YJR147W	649.282	834.927	525.519	0.629419	-0.667908	0.011789	0.113454
YJR148W	4734.05	6525.89	3539.49	0.542377	-0.882631	0.000578899	0.0158355
YJR149W	1000.63	1058.57	961.998	0.908769	-0.138014	0.616662	0.859487
YJR150C	67.8617	52.9314	77.8151	1.47011	0.555926	0.170022	0.480247
YJR151C	1210.89	1404.11	1082.08	0.770655	-0.375842	0.160383	0.466218
YJR151W-A	1.70237	1.88501	1.5806	0.838512	-0.254096	0.958429	1
YJR152W	566.253	647.702	511.954	0.790417	-0.339315	0.204705	0.527684
YJR153W	170.726	181.357	163.639	0.902304	-0.148314	0.564511	0.832099
YJR154W	1375.47	1179.61	1506.05	1.27674	0.352466	0.492616	0.784321
YJR155W	5877.23	6491.52	5467.7	0.842283	-0.247623	0.315222	0.632195
YJR156C	1285.86	1655.06	1039.73	0.628215	-0.67067	0.011153	0.111118
YJR157W	37.0284	52.9893	26.3877	0.497981	-1.00584	0.0825714	0.330693
YJR158W	576.199	470.913	646.389	1.37263	0.456942	0.0996024	0.363493
YJR159W	564.546	481.634	619.821	1.28691	0.363913	0.190872	0.508402
YJR160C	735.304	796.778	694.322	0.871411	-0.198574	0.435557	0.740957
YJR161C	2934.05	2637.51	3131.74	1.18739	0.24779	0.321879	0.638362
YJR162C	4.91249	5.06636	4.8099	0.94938	-0.0749429	1	1
YBL047C	4268.98	4412.24	4173.47	0.945885	-0.0802631	0.787908	0.942172
YBR012W-B	836.466	759.839	887.55	1.16808	0.224135	0.434768	0.740691
YBR078W	11755.6	7038.64	14900.2	2.11692	1.08196	0.0106197	0.107941
YBR140C	1407.96	1553.37	1311.01	0.843976	-0.244725	0.355306	0.672644
YBL113C	648.407	754.099	577.946	0.766406	-0.383819	0.152516	0.453097
YBL113W-A	0	0	0	NA	NA	NA	NA
YBL112C	0.188501	0.471252	0	0	#NAME?	0.789256	0.942299
YBL111C	148.567	160.121	140.864	0.879731	-0.184866	0.533876	0.81249
YBL109W	11.9915	13.6969	10.8545	0.792483	-0.335549	0.586204	0.845292
YBL108C-A	0.634292	0.559713	0.684011	1.22208	0.289333	1	1
YBL108W	3.78524	3.65261	3.87367	1.06052	0.0847735	1	1
YBL107W-A	4.8773	5.62608	4.37812	0.778183	-0.361819	0.81239	0.953611
YBL107C	571.989	439.542	660.287	1.50222	0.587093	0.0378942	0.217562
YBL106C	467.844	523.227	430.921	0.823584	-0.280012	0.294028	0.611516
YBL105C	1368.16	1359.75	1373.77	1.01031	0.0147993	0.94855	1
YBL104C	285.62	296.447	278.402	0.939129	-0.0906042	0.764746	0.930124
YBL103C	897.268	1202.69	693.654	0.576753	-0.793975	0.0279781	0.185834
YBL102W	2350.07	3174.94	1800.15	0.566988	-0.818609	0.0016361	0.0338475
YBL101C	1577.68	1936.94	1338.17	0.690868	-0.533519	0.161238	0.467172
YBL100W-C	9.53735	13.491	6.90158	0.511569	-0.966999	0.156676	0.460319
YBL100W-B	161.399	107.897	197.067	1.82643	0.869023	0.0460351	0.243919
YBL100W-A	0	0	0	NA	NA	NA	NA
YBL100C	276.745	269.264	281.733	1.04631	0.06531	0.862957	0.97346
YBL099W	15960.4	16572.3	15552.4	0.93846	-0.0916332	0.868563	0.975819
YBL098W	967.238	1201.42	811.119	0.675135	-0.566752	0.354231	0.67185
YBL097W	42.7393	31.2522	50.3973	1.6126	0.689387	0.098491	0.361316
YBL096C	17.858	21.9446	15.1335	0.689625	-0.536116	0.322525	0.63908
YBL095W	817.048	1279	509.08	0.39803	-1.32905	5.71695e-07	6.38922e-05
YBL094C	1.46101	2.7101	0.628277	0.231828	-2.10888	0.320783	0.638016
YBL093C	954.961	956.041	954.241	0.998118	-0.00271795	0.958555	1
YBL092W	5514.28	4173.29	6408.28	1.53555	0.618754	0.0562232	0.270337
YBL091C-A	586.047	712.514	501.735	0.704175	-0.505993	0.0614428	0.283491
YBL091C	2224.22	2274.28	2190.84	0.963312	-0.0539251	0.857924	0.971681
YBL090W	843.37	809.719	865.803	1.06926	0.096617	0.770763	0.933249
YBL089W	457.778	516.599	418.565	0.810232	-0.303594	0.285105	0.603665
YBL088C	576.773	556.515	590.279	1.06067	0.0849756	0.772871	0.934755
YBL087C	2305.26	1742.45	2680.46	1.53833	0.621366	0.0289699	0.189134
YBL086C	2013.67	2561.75	1648.29	0.643423	-0.636162	0.0147454	0.128745
YBL085W	830.306	911.785	775.987	0.851063	-0.232661	0.404249	0.716257
YBL084C	1011.17	1121.21	937.806	0.83642	-0.2577	0.337672	0.655956
YBL083C	4.96774	4.0354	5.58929	1.38507	0.469954	0.741858	0.922474
YBL082C	220.228	176.321	249.499	1.41503	0.500834	0.0980838	0.360584
YBL081W	240.698	162.712	292.689	1.79881	0.847046	0.00510595	0.0701232
YBL080C	369.02	357.597	376.636	1.05324	0.0748372	0.7874	0.942172
YBL079W	571.244	546.994	587.41	1.07389	0.102845	0.735845	0.918533
YBL078C	2602.45	3140.03	2244.06	0.714663	-0.484666	0.125026	0.410374
YBL077W	75.3339	87.9537	66.9207	0.760863	-0.394292	0.223126	0.548217
YBL076C	2489.37	2916.2	2204.82	0.756059	-0.403429	0.283234	0.601525
YBL075C	12265.1	19365.7	7531.39	0.388904	-1.36251	0.0997357	0.363571
YBL074C	87.552	82.4177	90.9749	1.10383	0.142514	0.705501	0.90776
YBL073W	4.41223	7.03983	2.66049	0.377919	-1.40385	0.137665	0.429114
YBL072C	10520.9	7429.36	12581.9	1.69354	0.760043	0.0192557	0.149196
YBL071C-B	1.82216	1.59068	1.97648	1.24254	0.31329	1	1
YBL071W-A	284.869	367.101	230.048	0.626662	-0.67424	0.0418648	0.231845
YBL071C	180.958	218.087	156.206	0.716256	-0.481453	0.100014	0.363696
YBL070C	18.8944	12.7833	22.9685	1.79676	0.845395	0.169354	0.479775
YBL069W	546.683	441.322	616.924	1.3979	0.483261	0.48947	0.783538
YBL068W-A	0	0	0	NA	NA	NA	NA
YBL068W	517.998	516.473	519.015	1.00492	0.00708298	0.960611	1
YBL067C	963.56	822.67	1057.49	1.28543	0.362254	0.188522	0.506256
YBL066C	781.371	818.205	756.816	0.924971	-0.11252	0.683172	0.895467
YBL065W	15.467	15.6414	15.3507	0.981418	-0.0270605	1	1
YBL064C	8783.46	10567.2	7594.32	0.71867	-0.476598	0.324801	0.64131
YBL063W	209.274	167.369	237.21	1.41729	0.503138	0.0964556	0.357086
YBL062W	1.70013	1.88501	1.57687	0.836533	-0.257506	0.949976	1
YBL061C	405.968	386.667	418.835	1.08319	0.115293	0.668092	0.888237
YBL060W	355.89	381.069	339.103	0.889873	-0.168329	0.518591	0.801532
YBL059C-A	575.023	585.562	567.996	0.970001	-0.0439418	0.881393	0.980835
YBL059W	244.465	217.739	262.282	1.20457	0.268516	0.365349	0.681594
YBL058W	3770.29	4200.77	3483.3	0.829204	-0.270202	0.315323	0.632202
YBL057C	445.841	427.871	457.82	1.06999	0.0976038	0.763648	0.929359
YBL056W	3082.39	2815.33	3260.44	1.1581	0.211763	0.415726	0.724787
YBL055C	639.305	573.913	682.899	1.1899	0.250841	0.37645	0.692337
YBL054W	722.455	668.311	758.55	1.13503	0.182724	0.589709	0.846345
YBL053W	12.8253	9.74994	14.8756	1.52571	0.609482	0.361006	0.678943
YBL052C	308.359	339.007	287.926	0.849321	-0.235617	0.387617	0.702555
YBL051C	1280.56	1333.72	1245.12	0.933566	-0.0991765	0.752229	0.927185
YBL050W	2785.88	3112.93	2567.86	0.824901	-0.277707	0.299398	0.616447
YBL049W	4683.52	6653.85	3369.96	0.506468	-0.981458	0.00171638	0.0346863
YBL048W	1448.55	2075.42	1030.64	0.496595	-1.00986	0.00844787	0.095772
YBL046W	583.014	543.544	609.328	1.12103	0.164823	0.579237	0.841612
YBL045C	10539.1	11994.2	9569.08	0.797806	-0.32589	0.407119	0.717391
YBL044W	4.50409	3.47569	5.18969	1.49314	0.57835	0.681852	0.895467
YBL043W	1655.6	1922.63	1477.59	0.768522	-0.379842	0.490615	0.784029
YBL042C	490.597	651.986	383.004	0.587441	-0.767483	0.124193	0.409107
YBL041W	2795.9	2942.81	2697.96	0.916798	-0.125324	0.653434	0.877731
YBL040C	818.345	784.857	840.67	1.07111	0.0991088	0.66573	0.886548
YBL039W-B	328.438	424.819	264.184	0.621874	-0.685307	0.0145527	0.127851
YBL039C	258.765	163.565	322.231	1.97005	0.978234	0.0267624	0.180341
YBL039C-A	0	0	0	NA	NA	NA	NA
YBL038W	951.259	816.761	1040.92	1.27445	0.34988	0.200395	0.520289
YBL037W	587.051	454.358	675.512	1.48674	0.572152	0.0407143	0.227473
YBL036C	674.238	818.868	577.818	0.70563	-0.503015	0.0527279	0.259647
YBL035C	289.386	233.614	326.567	1.39789	0.48325	0.0945454	0.353579
YBL034C	521.468	397.039	604.42	1.52232	0.606272	0.0303314	0.19393
YBL033C	2683.59	3164.63	2362.89	0.746655	-0.421486	0.111625	0.385056
YBL032W	710.876	597.574	786.411	1.31601	0.396167	0.144257	0.438304
YBL031W	74.6901	55.9375	87.1919	1.55874	0.640379	0.0555124	0.26871
YBL030C	5888.23	5342.33	6252.17	1.17031	0.226889	0.540658	0.816793
YBL029C-A	1835.36	2889.14	1132.84	0.392102	-1.3507	3.23437e-05	0.00181125
YBL029W	1865.81	2906.59	1171.96	0.403209	-1.3104	7.00816e-07	7.56099e-05
YBL028C	163.809	168.687	160.556	0.951796	-0.0712764	0.82996	0.959891
YBL027W	6140.09	4925.58	6949.76	1.41095	0.496669	0.0813794	0.328144
YBL026W	586.363	543.373	615.022	1.13186	0.178694	0.52233	0.804144
YBL025W	177.876	173.024	181.111	1.04674	0.0659086	0.855946	0.971028
YBL024W	513.427	347.574	623.997	1.79529	0.84422	0.00359291	0.0566148
YBL023C	394.715	333.41	435.585	1.30645	0.385655	0.171032	0.481468
YBL022C	1607.71	1420.53	1732.5	1.21961	0.286422	0.519303	0.802043
YBL021C	213.338	206.988	217.572	1.05114	0.0719487	0.822976	0.958075
YBL020W	480.971	423.014	519.609	1.22835	0.29672	0.290898	0.608982
YBL019W	674.759	751.223	623.784	0.830358	-0.268195	0.323387	0.63949
YBL018C	183.418	219.911	159.09	0.723428	-0.467078	0.302047	0.619178
YBL017C	3593.65	2841.21	4095.28	1.44138	0.527455	0.0472974	0.247159
YBL016W	2512.72	2078.24	2802.38	1.34844	0.431293	0.144575	0.439023
YBL015W	28721.5	29332.2	28314.4	0.965301	-0.0509493	0.858704	0.971955
YBL014C	217.829	209.405	223.445	1.06705	0.0936268	0.713662	0.910434
YBL013W	56.3515	48.1305	61.8322	1.28468	0.361407	0.366772	0.682541
YBL012C	25.3617	24.3893	26.0099	1.06645	0.0928117	0.858149	0.971681
YBL011W	1391.76	1332.29	1431.41	1.0744	0.103532	0.694829	0.902364
YBL010C	108.867	72.0485	133.413	1.85171	0.888856	0.00939827	0.101444
YBL009W	171.623	125.892	202.111	1.60543	0.682963	0.0364452	0.214251
YBL008W-A	4.00939	3.18136	4.56141	1.43379	0.519838	0.69667	0.903126
YBL008W	220.982	188.811	242.43	1.28398	0.360621	0.243485	0.567651
YBL007C	3456.47	3420.26	3480.61	1.01765	0.0252346	0.904221	0.988311
YBL006C	566.061	606.055	539.398	0.890015	-0.168098	0.555409	0.825803
YBL006W-A	0	0	0	NA	NA	NA	NA
YBL005W	927.82	938.07	920.986	0.981788	-0.0265165	0.863167	0.97346
YBL005W-B	682.05	589.173	743.968	1.26273	0.336548	0.233403	0.559891
YBL005W-A	0	0	0	NA	NA	NA	NA
YBL004W	661.361	542.421	740.655	1.36546	0.449388	0.126246	0.411988
YBL003C	2618.11	2092.39	2968.59	1.41876	0.504629	0.0904236	0.346841
YBL002W	1140.93	814.39	1358.63	1.66828	0.738358	0.110777	0.38297
YBL001C	3991.87	5088.66	3260.67	0.640773	-0.642116	0.0138716	0.123653
YBR001C	1962.98	2265.68	1761.18	0.777329	-0.363404	0.158989	0.465222
YBR002C	254.866	257.65	253.01	0.981993	-0.0262154	0.899635	0.986554
YBR003W	1157.39	1094.92	1199.04	1.0951	0.131058	0.625647	0.863482
YBR004C	703.732	484.311	850.012	1.7551	0.811551	0.0040789	0.060121
YBR005W	1114.09	1106.94	1118.85	1.01076	0.0154352	0.960809	1
YBR006W	2698.38	3012.46	2489	0.826235	-0.275375	0.296453	0.614081
YBR007C	338.685	354.169	328.362	0.927133	-0.109152	0.718808	0.913487
YBR008C	984.656	907.987	1035.77	1.14073	0.189957	0.491539	0.784321
YBR009C	6322.58	6743.73	6041.82	0.895916	-0.158564	0.594674	0.847894
YBR010W	11371.7	13077.9	10234.2	0.782557	-0.353733	0.195319	0.514515
YBR011C	5088.17	4709.94	5340.32	1.13384	0.181218	0.461811	0.762989
YBR012C	1.03281	0.559713	1.3482	2.40874	1.26828	0.821816	0.957409
YBR012W-A	0	0	0	NA	NA	NA	NA
YBR013C	1.16434	0	1.94057	Inf	Inf	0.244949	0.568484
YBR014C	538.321	531.01	543.195	1.02295	0.0327319	0.884765	0.981377
YBR015C	1285.04	1124.19	1392.28	1.23848	0.308571	0.251965	0.573499
YBR016W	2158.36	2685.93	1806.65	0.672634	-0.572107	0.0339696	0.203943
YBR017C	496.479	440.101	534.063	1.2135	0.279175	0.314423	0.632195
YBR018C	13746.5	6492.11	18582.7	2.86235	1.5172	0.0384482	0.219859
YBR019C	104272	82314.2	118911	1.4446	0.530672	0.220175	0.544239
YBR020W	86070	68318.3	97904.5	1.43306	0.519104	0.39146	0.705276
YBR021W	485.416	414.655	532.589	1.28441	0.361111	0.200516	0.520397
YBR022W	305.254	283.575	319.707	1.12742	0.173019	0.527521	0.807821
YBR023C	751.319	580.81	864.991	1.48929	0.57462	0.180385	0.493383
YBR024W	1136.06	1219.91	1080.17	0.885451	-0.175515	0.581599	0.842426
YBR025C	3491.55	2842.43	3924.29	1.38061	0.465311	0.101222	0.36603
YBR026C	6046.48	6901.82	5476.25	0.793451	-0.333787	0.312646	0.630337
YBR027C	35.7143	37.6455	34.4269	0.914502	-0.128942	0.854099	0.969969
YBR028C	497.738	513.141	487.469	0.949971	-0.0740442	0.729038	0.915963
YBR029C	814.507	576.034	973.49	1.68999	0.75701	0.0104471	0.10721
YBR030W	146.08	95.6128	179.724	1.87971	0.91051	0.102606	0.36833
YBR031W	10497.2	8202.23	12027.3	1.46634	0.552219	0.0951894	0.354355
YBR032W	26.444	31.4887	23.0808	0.732988	-0.448138	0.325316	0.641936
YBR033W	1859.28	2589.65	1372.37	0.529946	-0.916082	0.0560266	0.270337
YBR034C	530.575	422.726	602.475	1.42521	0.511177	0.0610616	0.282317
YBR035C	3432.42	4717.75	2575.53	0.545924	-0.873227	0.000696794	0.0182562
YBR036C	4756.8	4693.8	4798.81	1.02237	0.0319182	0.878052	0.980171
YBR037C	1014.64	1008.55	1018.71	1.01007	0.0144599	0.976707	1
YBR038W	495.652	274.441	643.126	2.3434	1.22861	0.00316907	0.0518553
YBR039W	5637.61	4912.32	6121.14	1.24608	0.317394	0.495395	0.785666
YBR040W	43.4673	50.3082	38.9067	0.773366	-0.370776	0.744573	0.923444
YBR041W	1113.15	1066.13	1144.49	1.0735	0.102319	0.681085	0.895467
YBR042C	292.75	262.278	313.064	1.19363	0.255358	0.36571	0.681875
YBR043C	722.328	797.295	672.35	0.84329	-0.2459	0.454506	0.757413
YBR044C	601.014	707.771	529.842	0.748606	-0.417722	0.116651	0.395527
YBR045C	487.584	721.729	331.488	0.459297	-1.1225	3.73397e-05	0.00198819
YBR046C	3364.45	5410.46	2000.44	0.369736	-1.43543	2.23609e-08	3.92584e-06
YBR047W	1132.69	2116.29	476.966	0.225379	-2.14958	6.61208e-10	1.59082e-07
YBR048W	2318.67	1741.85	2703.22	1.55192	0.634057	0.0750433	0.314651
YBR049C	792.273	786.145	796.359	1.01299	0.0186219	0.942001	0.999549
YBR050C	873.717	862.159	881.423	1.02234	0.0318806	0.966159	1
YBR051W	33.3069	38.7923	29.65	0.764328	-0.387737	0.447139	0.749385
YBR052C	3625.92	3990.34	3382.98	0.847794	-0.238215	0.385755	0.700941
YBR053C	2183.17	2755.65	1801.52	0.653756	-0.613176	0.0294407	0.190865
YBR054W	42927.8	42733.8	43057.1	1.00757	0.0108757	0.970021	1
YBR055C	384.833	370.819	394.176	1.06299	0.0881234	0.786464	0.941901
YBR056W	4268.3	5195	3650.5	0.702695	-0.50903	0.0980197	0.360553
YBR056W-A	241.446	126.778	317.891	2.50746	1.32622	0.135742	0.426398
YBR056C-B	0	0	0	NA	NA	NA	NA
YBR057C	1059.14	1094.5	1035.57	0.946158	-0.0798467	0.796215	0.945906
YBR058C	727.868	697.926	747.829	1.0715	0.0996328	0.732612	0.916565
YBR058C-A	608.928	620.893	600.951	0.96788	-0.0470992	0.823044	0.958075
YBR059C	1845.5	2040.76	1715.33	0.840538	-0.250614	0.365192	0.681495
YBR060C	251.466	220.155	272.34	1.23704	0.306888	0.280334	0.599423
YBR061C	261.498	242.598	274.097	1.12984	0.176119	0.556156	0.826347
YBR062C	1051.53	1124.32	1003.01	0.892107	-0.164711	0.544656	0.81976
YBR063C	378.96	463.521	322.586	0.695947	-0.52295	0.0562088	0.270337
YBR064W	1.5589	1.50222	1.59669	1.06289	0.0879943	1	1
YBR065C	236.643	267.398	216.139	0.808306	-0.307027	0.260256	0.581735
YBR066C	441.866	273.162	554.335	2.02932	1.021	0.37806	0.693554
YBR067C	14538.7	5217.68	20752.8	3.97739	1.99182	0.00327744	0.0528294
YBR068C	25223.6	45921	11425.4	0.248805	-2.00691	1.62316e-14	8.11082e-12
YBR069C	842.02	881.843	815.471	0.924735	-0.112889	0.809197	0.952445
YBR070C	212.676	178.618	235.381	1.31779	0.398125	0.399145	0.711447
YBR071W	2315.41	1871.82	2611.13	1.39497	0.480236	0.0671503	0.295935
YBR072W	111418	142401	90762.5	0.637372	-0.649793	0.412932	0.721465
YBR072C-A	2.95708	1.97347	3.61282	1.83069	0.872389	0.636603	0.870145
YBR073W	642.629	516.298	726.85	1.40781	0.493453	0.0812012	0.328037
YBR074W	516.516	505.758	523.688	1.03545	0.0502589	0.867457	0.975194
YBR076W	512.291	717.735	375.329	0.522935	-0.935296	0.0258066	0.17654
YBR076C-A	316.52	384.571	271.153	0.70508	-0.504142	0.0634517	0.286835
YBR077C	672.222	847.826	555.152	0.654794	-0.610887	0.0215184	0.159752
YBR079C	2352.71	1561.11	2880.43	1.84511	0.88371	0.00154778	0.0325025
YBR080C	882.715	814.043	928.496	1.1406	0.189792	0.477369	0.773314
YBR081C	629.312	851.482	481.198	0.56513	-0.823344	0.00195617	0.0380883
YBR082C	2275.8	1989.77	2466.49	1.23959	0.309859	0.24229	0.56681
YBR083W	1817.46	1812.32	1820.89	1.00473	0.00680499	1	1
YBR084W	491.075	282.594	630.062	2.22957	1.15676	0.00205552	0.0391573
YBR084C-A	5593.11	4666.21	6211.04	1.33107	0.412581	0.152479	0.453097
YBR085W	23.3499	19.5288	25.8973	1.32611	0.407198	0.488047	0.782224
YBR085C-A	6763.14	7216.47	6460.92	0.895302	-0.159553	0.528547	0.808629
YBR086C	5101.72	5952.39	4534.6	0.761812	-0.392493	0.201381	0.522433
YBR087W	222.92	159.354	265.297	1.66483	0.735372	0.0150683	0.130511
YBR088C	123.541	75.024	155.886	2.07782	1.05507	0.0585948	0.276882
YBR089W	0.942433	0.471252	1.25655	2.66641	1.4149	0.830004	0.959891
YBR089C-A	2089.63	2510.77	1808.87	0.720445	-0.473039	0.0818184	0.328894
YBR090C	552.361	706.647	449.504	0.636108	-0.652657	0.0148924	0.12916
YBR091C	112.506	95.3779	123.925	1.2993	0.377734	0.247458	0.571448
YBR092C	1867.24	889.663	2518.95	2.83135	1.50149	1.89118e-07	2.45703e-05
YBR093C	829.797	759.894	876.399	1.15332	0.205791	0.470117	0.768174
YBR094W	714.473	852.462	622.48	0.730215	-0.453607	0.0925277	0.34986
YBR095C	681.541	647.499	704.235	1.08762	0.121179	0.650606	0.877048
YBR096W	615.263	625.908	608.166	0.971654	-0.0414857	0.897641	0.986419
YBR097W	295.506	282.573	304.129	1.07628	0.106059	0.721047	0.914729
YBR098W	224.579	237.034	216.276	0.912427	-0.132219	0.655124	0.879005
YBR099C	0	0	0	NA	NA	NA	NA
YBR101C	1361.15	1193.42	1472.97	1.23424	0.303622	0.399769	0.712065
YBR102C	439.838	437.393	441.468	1.00932	0.0133792	0.967589	1
YBR103W	907.248	1100.21	778.61	0.707695	-0.498801	0.0596076	0.279172
YBR103C-A	3.84825	2.91597	4.46976	1.53285	0.616221	0.700743	0.904732
YBR104W	425.008	644.593	278.617	0.432238	-1.2101	0.0376111	0.216958
YBR105C	2006.27	3071.3	1296.24	0.422051	-1.24451	1.64234e-06	0.000140762
YBR106W	1954.25	1443.4	2294.81	1.58987	0.668908	0.166305	0.475772
YBR107C	256.735	270.843	247.33	0.913185	-0.13102	0.652115	0.877048
YBR108W	1053.96	1071.35	1042.37	0.972958	-0.0395512	0.905895	0.988759
YBR109C	2626	2839.8	2483.47	0.874522	-0.193434	0.470244	0.768174
YBR109W-A	21.4765	17.29	24.2676	1.40356	0.489093	0.426082	0.732749
YBR110W	722.201	717.278	725.483	1.01144	0.0164093	1	1
YBR111C	7075.98	12191.3	3665.75	0.300685	-1.73368	0.000874857	0.0215268
YBR111W-A	1033.57	1452.22	754.463	0.519523	-0.944742	0.000361541	0.0114565
YBR112C	1421.77	1334.15	1480.18	1.10946	0.149855	0.549151	0.821187
YBR113W	34.7594	26.982	39.9444	1.48041	0.565994	0.166129	0.475615
YBR114W	812.969	822.652	806.514	0.980382	-0.0285836	0.907478	0.988759
YBR115C	2323.35	2737.35	2047.35	0.747929	-0.419027	0.47765	0.773349
YBR116C	792.934	1165.22	544.743	0.467502	-1.09696	0.30884	0.625576
YBR117C	10754.1	15298.4	7724.52	0.504925	-0.985859	0.299686	0.616843
YBR118W	163480	129705	185997	1.434	0.52005	0.0576318	0.273925
YBR119W	1075.54	1131.42	1038.29	0.917682	-0.123934	0.615243	0.859487
YBR120C	595.973	547.944	627.991	1.14609	0.196716	0.480873	0.774535
YBR121C	1998.66	1346.38	2433.51	1.80745	0.853955	0.00229787	0.0419987
YBR121C-A	0	0	0	NA	NA	NA	NA
YBR122C	766.765	673.222	829.128	1.23158	0.300512	0.352419	0.669748
YBR123C	541.374	554.894	532.361	0.959393	-0.0598064	0.833203	0.962297
YBR124W	8.03104	8.15926	7.94555	0.973808	-0.0382904	1	1
YBR125C	917.951	1022.77	848.071	0.829188	-0.270228	0.314581	0.632195
YBR126C	24966.9	32474.5	19961.8	0.614694	-0.702061	0.0259026	0.176752
YBR126W-A	914.181	1284.38	667.378	0.519609	-0.944501	0.000503328	0.0145647
YBR126W-B	191.429	264.664	142.606	0.53882	-0.892126	0.00237613	0.042639
YBR127C	7415.21	6746.54	7860.99	1.16519	0.220564	0.405361	0.716518
YBR128C	446.996	559.962	371.685	0.663769	-0.591248	0.0319299	0.197709
YBR129C	484.328	527.935	455.257	0.862337	-0.213676	0.444235	0.74741
YBR130C	232.364	214.558	244.235	1.13831	0.186899	0.507045	0.795109
YBR131W	122.655	135.203	114.29	0.845324	-0.242424	0.429807	0.735907
YBR131C-A	0	0	0	NA	NA	NA	NA
YBR132C	2485.03	3017.12	2130.3	0.706073	-0.502111	0.0516001	0.257248
YBR133C	419.458	446.078	401.712	0.900541	-0.151136	0.603527	0.852471
YBR134W	6.3497	4.21232	7.77462	1.84569	0.884157	0.318351	0.635723
YBR135W	380.327	367.458	388.906	1.05837	0.0818446	0.820305	0.957377
YBR136W	512.352	533.741	498.093	0.933211	-0.0997252	0.677786	0.894132
YBR137W	1092.7	1345.56	924.124	0.686795	-0.542049	0.0432304	0.235393
YBR138C	283.366	225.399	322.011	1.42863	0.514631	0.0725299	0.307542
YBR139W	5117.71	6209.07	4390.14	0.707052	-0.500112	0.0624875	0.284811
YBR141C	130.586	133.67	128.53	0.961546	-0.0565717	0.84746	0.967347
YBR141W-A	0	0	0	NA	NA	NA	NA
YBR142W	298.563	203.92	361.659	1.77353	0.826622	0.00589121	0.0762337
YBR143C	1938.27	1529.25	2210.95	1.44577	0.531839	0.0527608	0.259647
YBR144C	10.456	16.5244	6.41033	0.387931	-1.36613	0.0309264	0.195616
YBR145W	4840.01	7284	3210.69	0.440786	-1.18185	0.0480756	0.24944
YBR146W	1388.98	1182.96	1526.32	1.29025	0.367655	0.172543	0.482497
YBR147W	4852.9	7035.59	3397.77	0.48294	-1.05008	0.01874	0.147023
YBR148W	254.428	347.606	192.309	0.553239	-0.854026	0.00198615	0.038285
YBR149W	7992.1	9773.6	6804.44	0.696207	-0.522412	0.0514211	0.256645
YBR150C	446.658	451.876	443.179	0.980754	-0.0280368	0.885478	0.981842
YBR151W	3342.99	3784.99	3048.33	0.805373	-0.312271	0.248223	0.572299
YBR152W	131.654	119.267	139.912	1.1731	0.230329	0.47711	0.773087
YBR153W	313.781	358.567	283.924	0.79183	-0.336738	0.217007	0.541743
YBR154C	612.955	432.526	733.242	1.69525	0.761502	0.00807289	0.0933122
YBR155W	176.051	157.265	188.575	1.19909	0.261944	0.395831	0.710309
YBR156C	160.524	129.988	180.881	1.39152	0.476659	0.116662	0.395527
YBR157C	1936.46	2909.9	1287.5	0.442457	-1.17639	0.240784	0.565469
YBR158W	900.838	820.201	954.596	1.16386	0.218913	0.422123	0.729478
YBR159W	1254.08	1018.36	1411.22	1.38578	0.470701	0.0809078	0.327463
YBR160W	834.83	739.873	898.135	1.2139	0.279655	0.297821	0.615932
YBR161W	609.966	697.376	551.693	0.791098	-0.338072	0.214567	0.539478
YBR162C	3936.91	2071.77	5180.34	2.50044	1.32218	0.093548	0.351468
YBR162W-A	431.533	332.172	497.773	1.49854	0.583559	0.18057	0.49368
YBR163W	340.383	325.988	349.98	1.0736	0.102455	0.729439	0.916171
YBR164C	286.947	216.884	333.656	1.53841	0.621438	0.0319514	0.197709
YBR165W	411.529	483.979	363.229	0.750505	-0.414066	0.212763	0.537725
YBR166C	452.753	450.697	454.123	1.0076	0.0109239	0.965986	1
YBR167C	337.944	358.592	324.178	0.904028	-0.145561	0.57938	0.841612
YBR168W	423.194	440.51	411.65	0.934485	-0.097756	0.715313	0.911344
YBR169C	10390.4	12806.3	8779.74	0.68558	-0.544604	0.302842	0.620103
YBR170C	910.872	1027.87	832.876	0.810296	-0.303478	0.248776	0.572519
YBR171W	379.623	301.536	431.681	1.43161	0.517637	0.0742622	0.312845
YBR172C	818.711	650.808	930.646	1.42999	0.516002	0.0589712	0.277586
YBR173C	1406.39	1210.27	1537.13	1.27007	0.344908	0.297919	0.615939
YBR174C	4.89363	5.24329	4.66052	0.888855	-0.16998	0.945383	1
YBR175W	79.1631	83.6851	76.1484	0.90994	-0.136157	0.715078	0.911344
YBR176W	397.339	476.829	344.346	0.72216	-0.46961	0.0776414	0.319619
YBR177C	3161.73	3875.89	2685.62	0.692902	-0.529276	0.118622	0.399051
YBR178W	4.52165	4.0354	4.84582	1.20083	0.264028	0.912771	0.990142
YBR179C	1074.56	1102.86	1055.69	0.957229	-0.0630633	0.797975	0.947099
YBR180W	85.0316	89.9256	81.7689	0.909296	-0.137179	0.76984	0.933174
YBR181C	8086.53	6098.34	9411.99	1.54337	0.626083	0.0253175	0.17496
YBR182C	677.855	427.727	844.607	1.97464	0.981592	0.00230165	0.0419987
YBR182C-A	3.8893	3.56415	4.10607	1.15205	0.204202	0.954437	1
YBR183W	1669.91	2086.8	1391.98	0.667038	-0.584158	0.0336855	0.202958
YBR184W	215.221	176.882	240.78	1.36124	0.444926	0.145919	0.441494
YBR185C	577.491	441.697	668.02	1.51239	0.596834	0.063555	0.286953
YBR186W	292.3	201.123	353.084	1.75556	0.81193	0.00639877	0.0805551
YBR187W	471.852	409.348	513.521	1.25448	0.327095	0.24467	0.568445
YBR188C	215.659	235.557	202.393	0.85921	-0.218917	0.439535	0.742772
YBR189W	3185.45	2119.65	3895.99	1.83804	0.878167	0.0110411	0.110854
YBR190W	142.542	113.961	161.596	1.41799	0.50385	0.186182	0.502051
YBR191W	3108.71	2368.65	3602.09	1.52073	0.604768	0.0864473	0.338903
YBR191W-A	12.7553	8.15926	15.8193	1.93881	0.955174	0.146507	0.442243
YBR192W	236.582	172.585	279.247	1.61803	0.69424	0.0184628	0.145965
YBR193C	484.584	455.392	504.045	1.10684	0.146443	0.58975	0.846345
YBR194W	149.583	139.68	156.184	1.11815	0.161119	0.625162	0.863482
YBR195C	421.051	496.692	370.624	0.746186	-0.422394	0.129008	0.416938
YBR196C	25569.1	19012.2	29940.3	1.5748	0.655167	0.0147052	0.128566
YBR196C-A	14.6036	12.8718	15.7581	1.22424	0.291881	0.739342	0.921482
YBR196C-B	20.8553	20.8541	20.8561	1.0001	0.000139025	0.999879	1
YBR197C	528.716	561.389	506.934	0.903	-0.147202	0.591307	0.846453
YBR198C	686.561	685.412	687.328	1.0028	0.0040275	0.990553	1
YBR199W	2479.74	2651.11	2365.49	0.892266	-0.164454	0.536845	0.814364
YBR200W	573.448	557.271	584.233	1.04838	0.0681652	0.840516	0.963204
YBR200W-A	35.1278	34.9048	35.2764	1.01064	0.0152753	1	1
YBR201W	441.822	475.01	419.696	0.883553	-0.178611	0.524368	0.804654
YBR201C-A	2145.26	2333.72	2019.62	0.865408	-0.208547	0.395398	0.709728
YBR202W	896.675	819.535	948.102	1.15688	0.210236	0.593432	0.847117
YBR203W	1773.14	2324.95	1405.28	0.604434	-0.726344	0.00554717	0.0739927
YBR204C	1209.47	1391.72	1087.97	0.781748	-0.355225	0.191085	0.508724
YBR205W	466.949	459.397	471.984	1.0274	0.0389952	0.875252	0.979713
YBR206W	20.039	22.9177	18.1198	0.790648	-0.338892	0.67635	0.893603
YBR207W	1922.24	2011.47	1862.76	0.926068	-0.11081	0.660569	0.88257
YBR208C	1616.54	1637.79	1602.37	0.978378	-0.0315356	0.899684	0.986554
YBR209W	35.5519	46.128	28.5012	0.617871	-0.694622	0.0934971	0.351468
YBR210W	229.304	227.047	230.808	1.01656	0.0237016	0.931183	0.994732
YBR211C	350.317	367.258	339.023	0.923118	-0.115412	0.705204	0.90776
YBR212W	3115.77	4158.46	2420.64	0.5821	-0.78066	0.00359943	0.0566148
YBR213W	114.25	142.566	95.3725	0.668971	-0.579984	0.0580446	0.275224
YBR214W	12700	15200.4	11033.1	0.72584	-0.462277	0.0899657	0.346629
YBR215W	653.723	668.508	643.867	0.96314	-0.0541819	0.866859	0.974927
YBR216C	557.612	553.923	560.071	1.0111	0.0159249	0.945202	1
YBR217W	210.087	211.702	209.011	0.987289	-0.0184551	0.961744	1
YBR218C	7659.65	10797.6	5567.65	0.515636	-0.955574	0.0220663	0.161604
YBR219C	46.3962	43.0931	48.5983	1.12775	0.173451	0.774915	0.93566
YBR220C	317.511	282.505	340.848	1.20652	0.27085	0.566137	0.832796
YBR221C	7532.4	8098.18	7155.22	0.883558	-0.178603	0.498233	0.787684
YBR221W-A	92.0923	119.68	73.7002	0.615809	-0.699446	0.0292867	0.190247
YBR222C	6766.7	7945.55	5980.8	0.752723	-0.40981	0.11792	0.398133
YBR223C	356.401	346.05	363.301	1.04985	0.0701839	0.791798	0.942864
YBR223W-A	0	0	0	NA	NA	NA	NA
YBR224W	22.1208	18.3805	24.6143	1.33916	0.421326	0.424497	0.731356
YBR225W	1139.01	1215.32	1088.13	0.895344	-0.159486	0.550011	0.821539
YBR226C	90.0254	102.714	81.5665	0.794115	-0.33258	0.309114	0.625742
YBR227C	515.263	520.255	511.935	0.984009	-0.0232568	0.935845	0.996971
YBR228W	609.415	682.14	560.931	0.822311	-0.282244	0.278788	0.597496
YBR229C	596.826	774.065	478.667	0.618381	-0.693432	0.00834973	0.0951576
YBR230C	10575.8	12292	9431.67	0.7673	-0.382137	0.132042	0.421155
YBR230W-A	1061.01	1301.09	900.959	0.692463	-0.530191	0.112183	0.385986
YBR231C	659.392	686.414	641.378	0.93439	-0.0979027	0.734213	0.917378
YBR232C	6.77019	6.45117	6.98287	1.08242	0.114259	0.904848	0.988311
YBR233W	192.689	188.427	195.53	1.0377	0.0533833	0.883022	0.98102
YBR233W-A	133.77	107.75	151.118	1.40249	0.487992	0.118413	0.398761
YBR234C	2060.53	1977.44	2115.93	1.07003	0.097653	0.694056	0.901969
YBR235W	883.765	990.045	812.911	0.821085	-0.284396	0.282903	0.601525
YBR236C	363.568	335.089	382.554	1.14165	0.191116	0.496703	0.786204
YBR237W	759.381	828.006	713.63	0.861866	-0.214465	0.406741	0.717206
YBR238C	183.975	126.159	222.519	1.7638	0.818683	0.0640235	0.287652
YBR239C	646.718	834.633	521.441	0.624755	-0.678637	0.0118823	0.113678
YBR240C	878.96	1067.74	753.106	0.705327	-0.503636	0.0574021	0.273376
YBR241C	6876.96	9643.02	5032.92	0.521923	-0.938091	0.00168686	0.0346768
YBR242W	1193.12	1568.82	942.657	0.60087	-0.734875	0.0182311	0.145365
YBR243C	301.871	236.146	345.687	1.46387	0.54979	0.0795568	0.323405
YBR244W	127.418	112.522	137.349	1.22064	0.287643	0.394475	0.708677
YBR245C	436.258	404.669	457.318	1.1301	0.176454	0.500634	0.790308
YBR246W	342.603	267.549	392.638	1.46754	0.553397	0.0518765	0.258087
YBR247C	275.524	196.53	328.187	1.66991	0.73977	0.0118717	0.113678
YBR248C	787.242	1167.3	533.867	0.45735	-1.12863	0.0255033	0.175611
YBR249C	5992.84	8629.52	4235.05	0.490763	-1.0269	0.118403	0.398761
YBR250W	128.841	131.547	127.037	0.965718	-0.0503267	0.80737	0.951508
YBR251W	826.892	639.969	951.508	1.4868	0.572214	0.0372197	0.216041
YBR252W	145.662	93.3755	180.52	1.93327	0.951045	0.00422706	0.0614321
YBR253W	387.882	424.282	363.616	0.857015	-0.222607	0.425287	0.732026
YBR254C	121.859	137.411	111.492	0.811374	-0.301562	0.321366	0.638362
YBR255W	762.145	843.447	707.944	0.839347	-0.252661	0.344629	0.662828
YBR255C-A	789.986	764.418	807.031	1.05575	0.0782616	0.794335	0.944649
YBR256C	5758.76	10200.3	2797.71	0.274276	-1.8663	5.81856e-13	2.22337e-10
YBR257W	318.714	314.026	321.84	1.02488	0.0354591	0.960257	1
YBR258C	157.679	135.116	172.722	1.27832	0.354252	0.23061	0.556183
YBR259W	195.368	182.92	203.667	1.11342	0.155001	0.63526	0.869697
YBR260C	501.886	489.086	510.42	1.04362	0.0615971	0.83678	0.962297
YBR261C	228.733	208.401	242.288	1.1626	0.217359	0.462539	0.76299
YBR262C	1417.84	1611.36	1288.83	0.79984	-0.322217	0.202334	0.524068
YBR263W	2475.91	2712.41	2318.24	0.854676	-0.22655	0.376405	0.692337
YBR264C	421.591	484.611	379.577	0.78326	-0.352436	0.216261	0.541361
YBR265W	781.329	610.47	895.234	1.46647	0.552346	0.0456104	0.242459
YBR267W	350.741	266.042	407.207	1.53061	0.614106	0.0371532	0.215874
YBR266C	0	0	0	NA	NA	NA	NA
YBR268W	444.522	416.656	463.099	1.11146	0.152462	0.602276	0.851496
YBR269C	3152.28	3888.07	2661.75	0.684594	-0.546679	0.0870507	0.340037
YBR270C	500.234	667.504	388.721	0.58235	-0.780041	0.00422724	0.0614321
YBR271W	210.82	205.189	214.574	1.04573	0.0645169	0.866973	0.974927
YBR272C	523.147	581.73	484.092	0.832159	-0.265069	0.338442	0.656863
YBR273C	1841.32	2074.42	1685.91	0.812715	-0.299179	0.260669	0.581892
YBR274W	483.656	468.79	493.567	1.05285	0.0743033	0.807837	0.951508
YBR275C	307.483	259.797	339.273	1.30592	0.385064	0.20866	0.533855
YBR276C	752.182	718.139	774.878	1.07901	0.109706	0.6693	0.889083
YBR277C	5.82577	8.45359	4.07389	0.481912	-1.05316	0.250678	0.573499
YBR278W	231.208	268.874	206.097	0.766516	-0.383612	0.197697	0.516801
YBR279W	1309.19	1331.29	1294.45	0.972323	-0.0404919	0.888447	0.982933
YBR280C	1786.64	2324.52	1428.06	0.614346	-0.702876	0.00707075	0.0862835
YBR281C	214.472	176.585	239.731	1.3576	0.441058	0.156669	0.460319
YBR282W	492.737	425.851	537.328	1.26177	0.335454	0.219626	0.543985
YBR283C	2122.03	1844.73	2306.9	1.25054	0.322547	0.221205	0.544948
YBR284W	479.637	468.677	486.944	1.03898	0.0551611	0.844099	0.965875
YBR285W	4500.79	6423.25	3219.15	0.501171	-0.996624	0.000105129	0.00458334
YBR286W	15504.9	19599.6	12775.1	0.651802	-0.617494	0.0186593	0.146744
YBR287W	4113.37	4323.5	3973.28	0.918997	-0.121869	0.66541	0.886485
YBR288C	339.457	267.962	387.121	1.44468	0.530753	0.061558	0.283603
YBR289W	574.042	512.567	615.026	1.19989	0.262908	0.339888	0.658685
YBR290W	1673.72	1737.22	1631.38	0.939076	-0.0906859	0.740358	0.922041
YBR291C	566.352	457.916	638.642	1.39467	0.479926	0.235752	0.560995
YBR292C	21.2566	22.0331	20.7389	0.941264	-0.0873284	0.917003	0.991019
YBR293W	652.015	730.174	599.909	0.821597	-0.283497	0.26986	0.589256
YBR294W	876.691	1223.81	645.279	0.52727	-0.923386	0.0059385	0.0765407
YBR295W	821.26	713.511	893.093	1.25169	0.323873	0.235196	0.560995
YBR296C	215.666	229.218	206.631	0.901458	-0.149667	0.648494	0.876292
YBR296C-A	8.50419	8.45359	8.53792	1.00998	0.0143201	1	1
YBR297W	1544.47	2320.46	1027.14	0.442645	-1.17578	8.15007e-06	0.000557294
YBR298C	4278.88	5184.45	3675.16	0.70888	-0.496387	0.0565744	0.271624
YBR298C-A	5.06172	5.27224	4.92137	0.933451	-0.0993542	0.901995	0.987754
YBR299W	626.437	417.742	765.568	1.83263	0.873918	0.0024554	0.0434613
YBR300C	31.2786	33.0198	30.1177	0.91211	-0.132721	0.784109	0.940768
YBR301W	30.205	27.5996	31.9419	1.15733	0.210802	0.760723	0.929207
YBR302C	3439.44	3114.43	3656.11	1.17392	0.231338	0.344859	0.662828
YDR293C	10258.2	12209.9	8956.98	0.733583	-0.446968	0.104193	0.371645
YDL183C	729.422	775.098	698.972	0.901786	-0.149143	0.551451	0.822208
YDL112W	437.098	413.729	452.677	1.09414	0.129795	0.727317	0.915363
YDL033C	222.655	194.32	241.545	1.24303	0.313856	0.302696	0.620092
YDR036C	636.8	562.463	686.358	1.22027	0.287204	0.37754	0.692797
YDR100W	921.669	1206.71	731.64	0.606309	-0.721875	0.00880741	0.0984733
YDR166C	816.785	888.751	768.807	0.865041	-0.209159	0.434407	0.740691
YDR351W	676.348	690.864	666.67	0.964981	-0.051428	0.878385	0.980171
YDR420W	1297.17	1184.42	1372.33	1.15865	0.21245	0.438914	0.742496
YDR496C	404.602	301.949	473.037	1.56661	0.647648	0.0272145	0.18263
YDL248W	2375.4	2164.74	2515.85	1.16219	0.216851	0.380254	0.696007
YDL247W-A	94.723	108.515	85.5283	0.78817	-0.343421	0.276744	0.59685
YDL247W	723.891	784.172	683.704	0.87188	-0.197798	0.437625	0.742464
YDL246C	526.556	449.703	577.791	1.28483	0.361573	0.197581	0.516801
YDL245C	625.139	511.296	701.034	1.37109	0.455326	0.102491	0.36833
YDL244W	1012.13	1291.37	825.965	0.639602	-0.644753	0.0153281	0.131883
YDL243C	1055.8	834.287	1203.48	1.44252	0.528594	0.162681	0.470305
YDL242W	43.3711	40.0307	45.598	1.13908	0.187864	0.635845	0.869766
YDL241W	14.5842	13.4315	15.3528	1.14304	0.192877	0.848404	0.967732
YDL240C-A	1.2136	1.11943	1.27638	1.14021	0.189295	1	1
YDL240W	190.607	164.128	208.259	1.26888	0.343561	0.244017	0.568149
YDL239C	273.543	339.545	229.542	0.676028	-0.564846	0.117781	0.398079
YDL238C	513.124	526.008	504.536	0.959179	-0.0601281	0.908563	0.98934
YDL237W	1293.33	1430.18	1202.09	0.840521	-0.250644	0.337019	0.655079
YDL236W	757.209	514.119	919.269	1.78805	0.838386	0.00309909	0.0514877
YDL235C	318.876	295.766	334.282	1.13022	0.176608	0.550187	0.821613
YDL234C	3963.56	3610.05	4199.23	1.16321	0.218107	0.392076	0.705715
YDL233W	674.682	643.554	695.435	1.08062	0.111855	0.668831	0.889024
YDL232W	231.928	221.479	238.894	1.07863	0.109203	0.702176	0.905207
YDL231C	1090.33	1022.23	1135.73	1.11103	0.151898	0.598032	0.848769
YDL230W	844.037	1104.81	670.189	0.60661	-0.721159	0.00738786	0.0875759
YDL229W	8952.25	5419.82	11307.2	2.08627	1.06092	0.00330124	0.0530648
YDL228C	1.99313	2.44472	1.69207	0.692133	-0.53088	0.754566	0.928299
YDL227C	104.656	89.5428	114.731	1.2813	0.357606	0.655658	0.879005
YDL226C	496.055	376.267	575.915	1.5306	0.614098	0.0396705	0.224087
YDL225W	642.607	551.825	703.129	1.27419	0.349577	0.205151	0.527984
YDL224C	993.958	958.027	1017.91	1.06251	0.0874737	0.757797	0.929207
YDL223C	12942.6	22260.6	6730.65	0.302357	-1.72568	0.0949367	0.354235
YDL222C	8134.15	12663.3	5114.74	0.403904	-1.30792	0.118935	0.399678
YDL221W	112.466	134.26	97.9368	0.729454	-0.45511	0.14238	0.436268
YDL220C	216.534	196.146	230.127	1.17325	0.230507	0.443259	0.747096
YDL219W	66.4307	37.5265	85.7001	2.28372	1.19139	0.00134534	0.0296248
YDL218W	5149.06	3414.87	6305.18	1.84639	0.884706	0.0369388	0.214942
YDL217C	300.301	259.121	327.754	1.26487	0.338986	0.249287	0.57297
YDL216C	409.684	473.416	367.197	0.775634	-0.366553	0.181191	0.494871
YDL215C	9744.37	10016.4	9563.05	0.954742	-0.0668168	0.777322	0.936998
YDL214C	3700.68	5054.69	2798.01	0.553547	-0.853222	0.00110314	0.0254361
YDL213C	485.943	386.837	552.014	1.42699	0.512979	0.0779378	0.320028
YDL212W	1562.35	1466.61	1626.19	1.10881	0.149007	0.57556	0.83981
YDL211C	125.834	118.44	130.763	1.10404	0.142789	0.741926	0.922474
YDL210W	1455.96	1088.15	1701.17	1.56336	0.644648	0.0701601	0.302916
YDL209C	152.383	130.017	167.294	1.28671	0.363682	0.254611	0.57649
YDL208W	681.796	465.252	826.158	1.77572	0.828407	0.00338012	0.053949
YDL207W	824.746	905.977	770.592	0.850565	-0.233507	0.37493	0.690636
YDL206W	897.171	1036.85	804.051	0.775473	-0.366851	0.171672	0.482333
YDL205C	614.355	691.078	563.207	0.814969	-0.295183	0.434716	0.740691
YDL204W	18565.1	24503.3	14606.3	0.596098	-0.746379	0.205346	0.52808
YDL203C	545.653	558.982	536.767	0.960257	-0.0585078	0.808355	0.951626
YDL202W	455.238	332.413	537.122	1.61583	0.692272	0.0146349	0.128125
YDL201W	507.283	456.447	541.174	1.18562	0.245644	0.397963	0.710992
YDL200C	777.715	929.601	676.457	0.727686	-0.458612	0.090782	0.347303
YDL199C	1558.88	2068.66	1219.03	0.589284	-0.762964	0.00421223	0.0614321
YDL198C	1622.67	1929.45	1418.14	0.734997	-0.444191	0.298864	0.616303
YDL197C	1327.21	1703.83	1076.14	0.631597	-0.662924	0.0129647	0.118953
YDL196W	25.6583	32.5486	21.0647	0.647177	-0.627767	0.152544	0.453097
YDL195W	2555.47	2333.83	2703.23	1.15828	0.211984	0.409836	0.719344
YDL194W	1842.32	2010.05	1730.5	0.860921	-0.216047	0.398598	0.711447
YDL193W	949.961	954.553	946.899	0.991982	-0.0116142	0.991345	1
YDL192W	1687.7	1148.52	2047.15	1.78243	0.833846	0.00302359	0.0503622
YDL191W	4910.32	4094.38	5454.28	1.33214	0.413742	0.190885	0.508402
YDL190C	949.28	964.636	939.043	0.973469	-0.0387938	0.910115	0.98939
YDL189W	376.375	383.191	371.831	0.970355	-0.043415	0.879365	0.980171
YDL188C	1689.37	1981.29	1494.75	0.754433	-0.406535	0.135184	0.426261
YDL187C	1.54925	1.50222	1.5806	1.05218	0.0733818	1	1
YDL186W	89.1207	76.9959	97.2039	1.26246	0.336232	0.400635	0.712304
YDL185C-A	65.3808	60.2962	68.7705	1.14054	0.189723	0.614799	0.859487
YDL185W	7527.04	6570.67	8164.61	1.24258	0.313344	0.240509	0.565044
YDL184C	1407.39	1070.11	1632.24	1.52531	0.6091	0.0336254	0.202958
YDL182W	10930.2	11698.7	10417.9	0.890512	-0.167294	0.755847	0.928652
YDL181W	1844.4	2295.81	1543.46	0.672296	-0.572832	0.146031	0.441628
YDL180W	580.609	624.395	551.418	0.883124	-0.179312	0.447288	0.749441
YDL179W	542.993	401.306	637.45	1.58844	0.667611	0.0179792	0.144725
YDL178W	1373.37	1306.43	1418	1.0854	0.118232	0.685619	0.896775
YDL177C	196.647	184.718	204.6	1.10763	0.14748	0.616836	0.859487
YDL176W	435.599	433.388	437.073	1.0085	0.0122149	0.964957	1
YDL175C	656.542	847.292	529.376	0.624785	-0.678568	0.0103232	0.106953
YDL174C	5483.77	5490.04	5479.59	0.998096	-0.00274952	1	1
YDL173W	1221.64	1185.94	1245.44	1.05017	0.0706241	0.799188	0.947532
YDL172C	0	0	0	NA	NA	NA	NA
YDL171C	5242.83	6279.26	4551.88	0.724908	-0.46413	0.277189	0.59685
YDL170W	1443.08	2417.95	793.164	0.328031	-1.60809	0.0186563	0.146744
YDL169C	1545.14	2045.15	1211.8	0.592523	-0.755057	0.00450367	0.0642986
YDL168W	1132.91	942.801	1259.65	1.33607	0.417996	0.131015	0.419868
YDL167C	204.568	237.354	182.711	0.769785	-0.377472	0.177912	0.489918
YDL166C	343.597	244.866	409.418	1.67201	0.74158	0.00970363	0.103336
YDL165W	553.842	560.34	549.51	0.980672	-0.0281579	0.91604	0.99094
YDL164C	357.995	303.398	394.393	1.29992	0.378421	0.165735	0.474907
YDL163W	0	0	0	NA	NA	NA	NA
YDL162C	15.2853	12.2831	17.2867	1.40735	0.492985	0.383757	0.699617
YDL161W	1192.66	903.597	1385.37	1.53317	0.616519	0.0207087	0.15606
YDL160C-A	118.802	138.177	105.886	0.766309	-0.384001	0.196401	0.515793
YDL160C	607.187	442.9	716.711	1.61822	0.694411	0.0135386	0.121776
YDL159W-A	1.49597	0	2.49329	Inf	Inf	0.180018	0.492783
YDL159W	560.192	607.293	528.791	0.870735	-0.199695	0.476513	0.772891
YDL159C-B	0	0	0	NA	NA	NA	NA
YDL158C	41.8322	41.5024	42.0521	1.01325	0.018985	1	1
YDL157C	193.773	109.691	249.829	2.27757	1.1875	0.00637178	0.080371
YDL156W	70.2709	44.7432	87.2893	1.95089	0.964135	0.00695757	0.0854374
YDL155W	629.983	571.645	668.875	1.17009	0.226617	0.424345	0.731356
YDL154W	380.18	420.397	353.368	0.840557	-0.250583	0.363206	0.679636
YDL153C	671.423	500.327	785.488	1.56995	0.650718	0.0259882	0.17696
YDL152W	2.1637	0.559713	3.23303	5.77623	2.53013	0.194033	0.513
YDL151C	4.94817	5.06636	4.86937	0.961117	-0.0572161	1	1
YDL150W	268.279	235.821	289.918	1.2294	0.297954	0.340739	0.659155
YDL149W	655.951	776.609	575.511	0.741056	-0.432345	0.109598	0.381744
YDL148C	282.899	210.397	331.234	1.57433	0.654736	0.0344001	0.205416
YDL147W	2815.83	2895.77	2762.54	0.953989	-0.0679551	0.837171	0.962297
YDL146W	547.684	605.77	508.96	0.840187	-0.251218	0.390879	0.705276
YDL145C	1955.96	1576.75	2208.76	1.40084	0.486289	0.0686964	0.298896
YDL144C	1202.03	1215.26	1193.21	0.981852	-0.026422	0.90466	0.988311
YDL143W	1362.61	1059.33	1564.79	1.47715	0.562818	0.0368932	0.214942
YDL142C	742.905	960.678	597.722	0.622188	-0.684577	0.00975994	0.103596
YDL141W	875.87	1101.96	725.145	0.658051	-0.603729	0.0194095	0.149921
YDL140C	3593.71	3392.36	3727.95	1.09893	0.136093	0.596948	0.848769
YDL139C	320.55	386.995	276.254	0.713843	-0.486321	0.0807175	0.326896
YDL138W	775.631	870.837	712.16	0.817788	-0.290201	0.283161	0.601525
YDL137W	4788.03	4710.4	4839.78	1.02747	0.039093	0.865691	0.974419
YDL136W	4533.04	3818.21	5009.59	1.31203	0.391796	0.218875	0.543506
YDL135C	635.697	575.98	675.509	1.1728	0.229957	0.400671	0.712304
YDL134C	3415.72	3464.57	3383.16	0.976502	-0.0343056	0.943865	1
YDL133C-A	1763.9	1369.67	2026.72	1.47972	0.565324	0.0497164	0.253141
YDL133W	949.181	983.351	926.401	0.942086	-0.0860688	0.750353	0.926433
YDL132W	1328.22	1512.79	1205.18	0.796664	-0.327956	0.229244	0.55442
YDL131W	11228.9	11317.6	11169.7	0.986936	-0.0189716	0.921527	0.991879
YDL130W-A	5705.32	6856.82	4937.65	0.720108	-0.473715	0.349155	0.665525
YDL130W	2389.6	1819.19	2769.87	1.52259	0.606523	0.0340024	0.203952
YDL129W	494.919	623.108	409.46	0.657124	-0.605762	0.0214872	0.159708
YDL128W	3042.07	3203.13	2934.7	0.916195	-0.126274	0.59385	0.847462
YDL127W	303.366	276.59	321.217	1.16135	0.215802	0.439898	0.743193
YDL126C	12612.7	13448.2	12055.7	0.896454	-0.157698	0.664272	0.885862
YDL125C	8429.35	8774.64	8199.16	0.934416	-0.0978633	0.749546	0.926433
YDL124W	19257.1	18661.9	19653.9	1.05315	0.0747163	0.834681	0.962297
YDL123W	1644.38	2047.11	1375.9	0.672118	-0.573213	0.0294227	0.190865
YDL122W	1050.04	919.563	1137.02	1.23648	0.306233	0.256855	0.578897
YDL121C	333.788	323.737	340.489	1.05174	0.0727834	0.973935	1
YDL120W	792.771	762.527	812.934	1.06611	0.092351	0.755911	0.928652
YDL119C	254.269	256.537	252.758	0.98527	-0.0214084	0.99314	1
YDL118W	6.84481	3.74107	8.91397	2.38273	1.25262	0.148572	0.44591
YDL117W	393.874	314.385	446.866	1.4214	0.507311	0.0660676	0.293152
YDL116W	480.081	426.141	516.041	1.21096	0.276154	0.308967	0.625639
YDL115C	1638.59	1876.32	1480.1	0.788832	-0.34221	0.185507	0.50127
YDL114W-A	0	0	0	NA	NA	NA	NA
YDL114W	112.493	120.941	106.861	0.883577	-0.178573	0.775329	0.935985
YDL113C	1237.56	1431.35	1108.36	0.774345	-0.368952	0.170016	0.480247
YDL111C	365.869	368.463	364.14	0.988268	-0.0170263	0.939543	0.997988
YDL110C	5324.98	7052.02	4173.62	0.591833	-0.756738	0.00410141	0.0601416
YDL109C	261.266	247.277	270.592	1.09429	0.129992	0.751312	0.927027
YDL108W	375.787	384.075	370.262	0.964034	-0.0528442	0.82294	0.958075
YDL107W	454.792	400.666	490.877	1.22515	0.292961	0.284602	0.603558
YDL106C	824.308	799.408	840.908	1.05191	0.0730153	0.770382	0.933249
YDL105W	148.099	144.48	150.512	1.04175	0.0590114	0.862538	0.97346
YDL104C	290.494	344.897	254.225	0.737103	-0.440062	0.0999373	0.363696
YDL103C	431.668	317.978	507.462	1.5959	0.674372	0.0161621	0.135662
YDL102W	266.301	216.472	299.521	1.38365	0.468475	0.103541	0.370508
YDL101C	304.931	173.083	392.83	2.2696	1.18244	5.46278e-05	0.00268835
YDL100C	1498.69	1035.29	1807.62	1.746	0.804051	0.00302148	0.0503622
YDL099W	1415.48	1362.9	1450.54	1.0643	0.0899043	0.740108	0.922041
YDL098C	205.585	160.74	235.481	1.46498	0.550876	0.0624325	0.284811
YDL097C	3054.94	2978.07	3106.18	1.04302	0.0607652	0.79962	0.947698
YDL096C	11.9181	14.3451	10.3001	0.718024	-0.477896	0.476287	0.772717
YDL095W	1546.63	1413.85	1635.15	1.15652	0.209796	0.386619	0.701726
YDL094C	10.1645	7.12829	12.1887	1.7099	0.773909	0.27156	0.590182
YDL093W	393.808	293.465	460.704	1.56988	0.650654	0.0246245	0.171816
YDL092W	604.573	629.143	588.192	0.934911	-0.0970993	0.683765	0.895693
YDL091C	1293.8	1486.64	1165.25	0.783814	-0.351417	0.242096	0.566723
YDL090C	267.454	282.246	257.593	0.912654	-0.131861	0.664947	0.886186
YDL089W	514.893	556.871	486.908	0.874364	-0.193695	0.50717	0.795109
YDL088C	1280.03	1279.61	1280.31	1.00055	0.000795411	0.986288	1
YDL087C	160.377	146.188	169.837	1.16177	0.216327	0.521466	0.803473
YDL086W	1162.02	1500.91	936.094	0.623682	-0.681117	0.0116979	0.112911
YDL086C-A	0	0	0	NA	NA	NA	NA
YDL085C-A	141.639	196.758	104.893	0.533104	-0.907512	0.145064	0.439799
YDL085W	5213.43	9091.18	2628.26	0.2891	-1.79036	7.14737e-12	2.57941e-09
YDL084W	2040.54	1752.07	2232.84	1.2744	0.349819	0.181497	0.495153
YDL083C	2702.92	2010.01	3164.86	1.57455	0.654942	0.0709795	0.303344
YDL082W	2153.91	1467.69	2611.39	1.77925	0.83127	0.00330838	0.0530648
YDL081C	3565.7	2761.93	4101.54	1.48502	0.570486	0.132607	0.421847
YDL080C	478.114	513.966	454.213	0.883742	-0.178302	0.546776	0.821151
YDL079C	7191.5	9316.9	5774.57	0.619796	-0.690135	0.00735721	0.0873719
YDL078C	6333.54	8186.96	5097.93	0.622689	-0.683416	0.0453386	0.242197
YDL077C	298.204	295.47	300.027	1.01542	0.0220772	0.988428	1
YDL076C	630.158	781.016	529.585	0.678072	-0.56049	0.0339099	0.203773
YDL075W	3295.6	2575.11	3775.93	1.46632	0.552201	0.0955254	0.355199
YDL074C	512.38	477.453	535.665	1.12192	0.165974	0.546903	0.821151
YDL073W	228.492	207.78	242.299	1.16613	0.22173	0.485284	0.778756
YDL072C	4054.24	3829.41	4204.13	1.09785	0.134686	0.556104	0.826347
YDL071C	47.3912	49.3979	46.0534	0.932294	-0.101142	0.827992	0.95912
YDL070W	3186.01	3120.28	3229.83	1.03511	0.0497821	0.821665	0.957406
YDL069C	77.9225	81.2983	75.6721	0.930796	-0.103464	0.76259	0.929207
YDL068W	1.43132	0.559713	2.01239	3.5954	1.84615	0.515618	0.799637
YDL067C	3219.53	3690.22	2905.73	0.787413	-0.344807	0.228726	0.554286
YDL066W	4631.24	5886.4	3794.46	0.644615	-0.63349	0.0116902	0.112911
YDL065C	876.056	857.526	888.409	1.03601	0.0510435	0.853844	0.96985
YDL064W	486.055	431.117	522.681	1.21239	0.27785	0.317625	0.635251
YDL063C	145.788	101.035	175.624	1.73825	0.797639	0.0105047	0.107462
YDL062W	3.68764	4.77203	2.96472	0.621269	-0.68671	0.600611	0.850772
YDL061C	1703.82	1298.68	1973.92	1.51994	0.604019	0.0486933	0.250246
YDL060W	428.317	335.117	490.451	1.46352	0.549446	0.0588204	0.277328
YDL059C	131.595	181.776	98.1401	0.539895	-0.889249	0.0186922	0.146825
YDL058W	373.633	350.821	388.841	1.10838	0.148447	0.597748	0.848769
YDL057W	525.656	605.09	472.7	0.781207	-0.356224	0.211951	0.537022
YDL056W	670.233	680.672	663.273	0.974439	-0.037356	0.883037	0.98102
YDL055C	9175.87	5109.56	11886.7	2.32637	1.21808	0.00674329	0.083437
YDL054C	2684.71	4187.25	1683.01	0.401937	-1.31496	0.000589566	0.0159576
YDL053C	885.67	928.803	856.914	0.9226	-0.116222	0.653308	0.877731
YDL052C	814.892	719.906	878.216	1.2199	0.286766	0.2712	0.589849
YDL051W	330.635	260.969	377.078	1.44491	0.530984	0.355686	0.672644
YDL050C	9.23999	5.44916	11.7672	2.15946	1.11067	0.159836	0.466088
YDL049C	390.139	375.733	399.743	1.0639	0.0893647	0.873047	0.978736
YDL048C	3143.97	2833.57	3350.89	1.18257	0.241922	0.706947	0.907836
YDL047W	1610.98	1721.11	1537.56	0.893355	-0.162695	0.542482	0.818044
YDL046W	6133.75	7119.16	5476.81	0.769305	-0.378373	0.189491	0.506256
YDL045W-A	459.324	397.423	500.591	1.25959	0.332955	0.231635	0.557296
YDL045C	745.082	816.143	697.707	0.854884	-0.2262	0.419606	0.72784
YDL044C	264.147	217.592	295.184	1.3566	0.439991	0.138922	0.431376
YDL043C	254.687	259.092	251.75	0.97166	-0.0414758	0.862624	0.97346
YDL042C	430.53	485.578	393.832	0.811058	-0.302123	0.263385	0.584136
YDL041W	2.61155	3.56415	1.97648	0.554544	-0.850625	0.551209	0.822208
YDL040C	766.207	631.325	856.128	1.35608	0.439443	0.119193	0.399678
YDL039C	237.425	198.597	263.311	1.32586	0.406924	0.168271	0.478584
YDL037C	85.2621	78.3244	89.8872	1.14763	0.198654	0.533582	0.81249
YDL036C	279.992	277.296	281.789	1.0162	0.0231883	0.984413	1
YDL035C	1394.07	1744.71	1160.3	0.665042	-0.588482	0.0254447	0.175466
YDL034W	15.7852	16.7898	15.1155	0.900277	-0.151559	0.795783	0.9457
YDL032W	1.69082	2.79856	0.952326	0.340291	-1.55516	0.567609	0.833451
YDL031W	658.48	658.721	658.32	0.999392	-0.00087809	0.955122	1
YDL030W	522.193	598.487	471.33	0.787536	-0.344582	0.197866	0.516999
YDL029W	3098.01	2856.32	3259.14	1.14103	0.190337	0.444612	0.747447
YDL028C	584.974	623.465	559.313	0.897104	-0.156653	0.580782	0.842076
YDL027C	1419.99	1365.12	1456.57	1.06699	0.0935462	0.693099	0.90142
YDL026W	6.4183	2.15039	9.26358	4.30786	2.10697	0.0255391	0.175611
YDL025C	2226.85	2830.01	1824.74	0.644784	-0.633112	0.0134773	0.121595
YDL025W-A	0	0	0	NA	NA	NA	NA
YDL024C	718.152	976.666	545.809	0.558849	-0.839469	0.00153816	0.0324412
YDL022C-A	27.1917	39.1172	19.2413	0.49189	-1.02359	0.0184918	0.145965
YDL023C	321.185	396.27	271.128	0.684199	-0.547511	0.0489628	0.250957
YDL022W	10465.7	13311.5	8568.44	0.643687	-0.635569	0.0158407	0.134244
YDL021W	1300.22	1142.02	1405.68	1.23087	0.299674	0.243574	0.567651
YDL020C	4536.3	3861.28	4986.31	1.29136	0.368892	0.169634	0.479939
YDL019C	2587.21	3050.23	2278.53	0.747005	-0.420811	0.107463	0.378569
YDL018C	428.448	424.518	431.068	1.01543	0.0220892	0.926352	0.992525
YDL017W	254.342	225.574	273.521	1.21255	0.27805	0.345107	0.662828
YDL016C	145.831	147.751	144.551	0.978341	-0.0315902	0.910971	0.989742
YDL015C	1830.69	1707.65	1912.72	1.12009	0.163617	0.562416	0.830141
YDL014W	1633.89	858.213	2151.01	2.50639	1.32561	1.19284e-05	0.000782698
YDL013W	1047.12	1140.43	984.917	0.86364	-0.211499	0.445299	0.747651
YDL012C	879.287	774.896	948.88	1.22453	0.292223	0.280929	0.599906
YDL011C	13.9203	10.2212	16.3864	1.60318	0.680933	0.259844	0.581735
YDL010W	527.531	450.025	579.201	1.28704	0.364059	0.18902	0.506256
YDL009C	245.496	229.079	256.442	1.11945	0.162788	0.573359	0.837916
YDL008W	317.492	256.387	358.229	1.39722	0.482559	0.0887355	0.343724
YDL007C-A	12.9274	8.0708	16.1652	2.00292	1.0021	0.119114	0.399678
YDL007W	3201.11	3091.1	3274.45	1.05932	0.0831321	0.774493	0.935402
YDL006W	443.857	463.104	431.026	0.930732	-0.103562	0.698086	0.903552
YDL005C	1194.22	1274.14	1140.95	0.89547	-0.159283	0.518044	0.801432
YDL004W	3982.83	3914.82	4028.18	1.02896	0.0411823	0.928883	0.993255
YDL003W	135.94	97.7937	161.372	1.65012	0.722573	0.0201814	0.154233
YDL002C	659.195	666.856	654.087	0.980853	-0.0278917	0.920919	0.991733
YDL001W	390.467	364.576	407.727	1.11836	0.161387	0.55853	0.828349
YDR001C	7147.75	7926.03	6628.9	0.836346	-0.257829	0.341889	0.660985
YDR002W	2083.85	1509.69	2466.63	1.63386	0.708284	0.00792932	0.0923098
YDR003W	1627.91	1902.9	1444.59	0.759153	-0.397537	0.13776	0.429204
YDR003W-A	337.143	393.917	299.294	0.759788	-0.396331	0.159739	0.466088
YDR004W	430.307	426.252	433.011	1.01586	0.0226985	0.944058	1
YDR005C	1382.84	1303.03	1436.04	1.10208	0.140227	0.618238	0.859487
YDR006C	1734.59	1920.28	1610.79	0.838831	-0.253547	0.321782	0.638362
YDR007W	377.092	508.401	289.553	0.569536	-0.812141	0.00377821	0.0576549
YDR008C	22.8249	30.8405	17.4812	0.566826	-0.819023	0.0878686	0.341384
YDR009W	1257.42	868.074	1516.98	1.74752	0.80531	0.00347882	0.0553882
YDR010C	150.15	116.501	172.584	1.4814	0.566957	0.0597453	0.279213
YDR011W	2614.28	3190.17	2230.36	0.699137	-0.516353	0.0376404	0.216958
YDR012W	10853.7	8672.97	12307.5	1.41907	0.504942	0.15267	0.453264
YDR013W	184.777	145.894	210.699	1.4442	0.530269	0.0839766	0.333239
YDR014W	175.76	154.407	189.995	1.23049	0.299227	0.344925	0.662828
YDR014W-A	104.64	17.1436	162.971	9.50623	3.24887	8.81741e-17	7.15974e-14
YDR015C	0	0	0	NA	NA	NA	NA
YDR016C	297.598	352.851	260.763	0.739018	-0.436319	0.110394	0.38279
YDR017C	972.561	896.658	1023.16	1.14109	0.190407	0.513229	0.798356
YDR018C	1392.34	1728.78	1168.05	0.67565	-0.565653	0.031689	0.196987
YDR019C	1345.82	1286.74	1385.21	1.07653	0.106389	0.734813	0.917599
YDR020C	124.076	140.856	112.889	0.801447	-0.319322	0.267641	0.587806
YDR021W	101.3	76.9975	117.502	1.52605	0.609804	0.068861	0.299313
YDR022C	400.306	437.988	375.184	0.856609	-0.223292	0.499986	0.789861
YDR023W	1998.9	1270.91	2484.23	1.95468	0.966936	0.000597142	0.0160574
YDR024W	83.6989	81.7985	84.9658	1.03872	0.0548088	0.92339	0.992106
YDR025W	3976.8	3246.36	4463.75	1.375	0.459431	0.13976	0.432409
YDR026C	409.564	356.534	444.918	1.2479	0.319502	0.260939	0.582294
YDR027C	660.97	679.934	648.328	0.953517	-0.0686695	0.817442	0.955269
YDR028C	2546.53	2371.15	2663.44	1.12327	0.167703	0.500498	0.790286
YDR029W	64.5009	57.4108	69.2276	1.20583	0.270026	0.592963	0.847117
YDR030C	836.199	1038.3	701.463	0.675585	-0.565791	0.0332553	0.202083
YDR031W	766.844	840.711	717.599	0.853562	-0.228433	0.396966	0.710408
YDR032C	6988.26	7776.12	6463.02	0.831138	-0.266841	0.401923	0.713591
YDR033W	14414.6	10895.6	16760.6	1.53828	0.621322	0.0484968	0.25007
YDR034C	2385.68	1875.89	2725.55	1.45294	0.538972	0.0486205	0.25007
YDR034C-D	120.463	77.94	148.811	1.9093	0.933044	0.0113784	0.111741
YDR034C-C	0	0	0	NA	NA	NA	NA
YDR034C-A	20.0354	24.7721	16.8776	0.681315	-0.553605	0.259689	0.581735
YDR034W-B	910.733	1130.12	764.474	0.676454	-0.563937	0.0300826	0.193291
YDR035W	7456.88	10645.1	5331.39	0.50083	-0.997608	0.0123284	0.116441
YDR037W	4112.99	4606.94	3783.69	0.821304	-0.284013	0.473236	0.769562
YDR038C	2189.78	2891.14	1722.21	0.595685	-0.747379	0.179427	0.491588
YDR039C	2401.63	3218.49	1857.06	0.576996	-0.793367	0.170386	0.480602
YDR040C	2468.5	3386.7	1856.37	0.548135	-0.867397	0.172218	0.482333
YDR041W	1362.63	1493.33	1275.49	0.854127	-0.227478	0.381195	0.696551
YDR042C	49.5343	37.4975	57.5588	1.535	0.618242	0.0978749	0.360428
YDR043C	4345.5	6429.04	2956.48	0.459863	-1.12072	0.083446	0.332693
YDR044W	722.422	355.535	967.014	2.71988	1.44355	0.00032253	0.0106353
YDR045C	110.717	104.361	114.954	1.10151	0.139481	0.709049	0.907941
YDR046C	2193.25	1709.18	2515.97	1.47204	0.557812	0.0504647	0.254123
YDR047W	641.922	436.537	778.845	1.78414	0.835232	0.0026913	0.0460071
YDR048C	25.3377	29.1324	22.8079	0.782906	-0.353088	0.481312	0.774871
YDR049W	433.932	449.181	423.767	0.943421	-0.0840257	0.786918	0.942172
YDR050C	35894	21715.1	45346.7	2.08826	1.0623	8.78153e-05	0.00401724
YDR051C	865.845	924.657	826.637	0.893994	-0.161664	0.568569	0.834053
YDR052C	367.221	282.89	423.441	1.49684	0.581921	0.170225	0.480356
YDR053W	1.1485	1.50222	0.912683	0.607557	-0.718908	0.879299	0.980171
YDR054C	2460.99	2677.25	2316.81	0.865369	-0.208613	0.43451	0.740691
YDR055W	17185.8	10423.1	21694.3	2.08137	1.05753	0.000141997	0.00565898
YDR056C	1945.04	1439.63	2281.98	1.58512	0.664593	0.0134643	0.121595
YDR057W	724.201	705.182	736.881	1.04495	0.063437	0.812127	0.953611
YDR058C	648.538	693.074	618.847	0.892901	-0.163427	0.547236	0.821151
YDR059C	2071.06	2591.25	1724.27	0.665419	-0.587666	0.0229915	0.165723
YDR060W	527.364	374.319	629.394	1.68144	0.749694	0.0100474	0.105783
YDR061W	896.688	856.906	923.209	1.07738	0.107521	0.706693	0.907836
YDR062W	1213.22	992.694	1360.24	1.37025	0.454439	0.0891326	0.344768
YDR063W	795.121	943.568	696.156	0.737791	-0.438715	0.105641	0.374586
YDR064W	4238.88	3203.21	4929.33	1.53887	0.621874	0.197441	0.516751
YDR065W	109.006	85.0683	124.964	1.46899	0.554822	0.0964046	0.357086
YDR066C	138.89	125.483	147.827	1.17806	0.236414	0.437258	0.742401
YDR067C	770.467	811.46	743.138	0.915804	-0.126889	0.651903	0.877048
YDR068W	1008.26	1038.91	987.832	0.950833	-0.0727363	0.777228	0.936998
YDR069C	919.592	1047.07	834.606	0.797088	-0.32719	0.209764	0.534731
YDR070C	5233.98	8385.5	3132.97	0.373618	-1.42037	0.00891319	0.0989745
YDR071C	1609.98	1621.06	1602.59	0.988609	-0.0165274	0.962528	1
YDR072C	1620.92	1821	1487.52	0.816872	-0.291818	0.296246	0.613848
YDR073W	781.171	970.482	654.963	0.674884	-0.567289	0.0357471	0.211487
YDR074W	14286.5	16317.4	12932.5	0.792563	-0.335402	0.194513	0.513298
YDR075W	303.077	287.515	313.451	1.09021	0.124601	0.719078	0.913487
YDR076W	428.649	582.96	325.775	0.558829	-0.83952	0.00197344	0.0382671
YDR077W	184634	154536	204699	1.3246	0.405561	0.125532	0.411026
YDR078C	289.308	358.305	243.311	0.679061	-0.558387	0.0503417	0.2537
YDR079W	762.593	855.818	700.443	0.818448	-0.289037	0.271819	0.590364
YDR079C-A	198.497	231.761	176.321	0.760789	-0.394432	0.176172	0.48701
YDR080W	637.8	974.51	413.327	0.424138	-1.23739	2.61851e-06	0.000204938
YDR081C	492.972	486.315	497.41	1.02282	0.0325453	0.932341	0.994987
YDR082W	392.215	428.198	368.226	0.859944	-0.217686	0.400452	0.712304
YDR083W	384.919	329.904	421.596	1.27794	0.353817	0.235611	0.560995
YDR084C	544.334	560.079	533.837	0.953145	-0.0692327	0.815528	0.954569
YDR085C	1821.32	2034.71	1679.05	0.825206	-0.277173	0.395348	0.709728
YDR086C	840.794	737.61	909.584	1.23315	0.302349	0.238362	0.564143
YDR087C	233.596	157.115	284.583	1.8113	0.857026	0.00490212	0.0680432
YDR088C	540.623	553.89	531.777	0.960077	-0.0587784	0.835198	0.962297
YDR089W	602.869	735.784	514.258	0.698926	-0.516789	0.0625922	0.284811
YDR090C	628.335	752.03	545.872	0.725864	-0.462228	0.0774958	0.319424
YDR091C	701.307	494.876	838.928	1.69523	0.76148	0.0485979	0.25007
YDR092W	1123.53	1316.48	994.895	0.755723	-0.404071	0.10913	0.381544
YDR093W	373.133	291.285	427.699	1.46832	0.554162	0.100444	0.363906
YDR094W	0	0	0	NA	NA	NA	NA
YDR095C	5.74345	5.62608	5.8217	1.03477	0.04931	1	1
YDR096W	3302.8	4341.81	2610.13	0.601161	-0.734178	0.00542655	0.0727472
YDR097C	383.64	333.642	416.972	1.24976	0.321651	0.285832	0.603947
YDR098C	743.166	633.257	816.439	1.28927	0.366554	0.300433	0.617599
YDR098C-B	172.143	120.444	206.608	1.71538	0.77853	0.0116966	0.112911
YDR098C-A	0	0	0	NA	NA	NA	NA
YDR099W	9600.13	11599.1	8267.48	0.712768	-0.488495	0.0642375	0.288061
YDR101C	380.394	238.941	474.695	1.98666	0.990348	0.000815941	0.0203079
YDR102C	9.17334	7.59955	10.2225	1.34515	0.427767	0.632355	0.868864
YDR103W	775.165	743.261	796.434	1.07154	0.0996847	0.719068	0.913487
YDR104C	323.358	340.217	312.119	0.917413	-0.124356	0.640785	0.871627
YDR105C	1241.96	1564.45	1026.96	0.656437	-0.60727	0.0226507	0.164217
YDR106W	57.099	61.4446	54.202	0.882129	-0.180938	0.591851	0.846453
YDR107C	557.943	606.283	525.716	0.867113	-0.205708	0.420792	0.72873
YDR108W	297.675	336.797	271.593	0.806398	-0.310437	0.253757	0.575359
YDR109C	394.323	443.545	361.508	0.815042	-0.295054	0.275791	0.595988
YDR110W	210.743	215.703	207.436	0.961674	-0.0563808	0.815834	0.954721
YDR111C	369.373	411.077	341.571	0.830918	-0.267223	0.540523	0.816793
YDR112W	5.21279	6.3032	4.48585	0.711679	-0.490702	0.634794	0.869626
YDR113C	317.558	263.393	353.667	1.34274	0.425175	0.139934	0.432409
YDR114C	71.4677	69.1921	72.9849	1.05482	0.0769905	0.855205	0.971028
YDR115W	546.111	464.142	600.757	1.29434	0.372217	0.174023	0.484756
YDR116C	1013.15	786.215	1164.44	1.48107	0.566644	0.0387645	0.22089
YDR117C	374.611	389.113	364.942	0.937883	-0.0925202	0.763664	0.929359
YDR118W	172.692	160.475	180.837	1.12688	0.172339	0.59863	0.849246
YDR118W-A	4.17638	4.59511	3.89722	0.848123	-0.237654	0.899959	0.986652
YDR119W	501.708	551.677	468.395	0.849038	-0.236099	0.365111	0.681495
YDR119W-A	21697.2	29758.7	16322.9	0.548509	-0.866412	0.000897179	0.0217465
YDR120C	688.16	856.671	575.82	0.67216	-0.573124	0.161932	0.468558
YDR121W	366.745	320.796	397.379	1.23873	0.308859	0.441899	0.745751
YDR122W	2025.81	2210.91	1902.4	0.86046	-0.21682	0.421555	0.729456
YDR123C	262.561	267.544	259.24	0.96896	-0.0454917	0.882553	0.98102
YDR124W	390.545	410.678	377.123	0.918293	-0.122974	0.683199	0.895467
YDR125C	322.038	334.327	313.846	0.938739	-0.0912047	0.750157	0.926433
YDR126W	917.387	1667.5	417.312	0.250262	-1.99849	9.2756e-07	9.26989e-05
YDR127W	5750.59	7352.14	4682.88	0.636941	-0.650769	0.0108681	0.109287
YDR128W	756.812	845.06	697.981	0.825954	-0.275867	0.290805	0.608982
YDR129C	7055.89	7205.7	6956.01	0.965348	-0.0508786	0.888398	0.982933
YDR130C	316.688	332.291	306.285	0.921739	-0.11757	0.698178	0.903552
YDR131C	293.827	306.253	285.544	0.932378	-0.101013	0.713429	0.910434
YDR132C	517.599	541.543	501.636	0.926309	-0.110435	0.666815	0.887084
YDR133C	12966.8	16596.2	10547.2	0.63552	-0.653991	0.218635	0.543326
YDR135C	1653.17	1690.89	1628.03	0.962821	-0.0546603	0.841272	0.963319
YDR136C	15.3115	18.5574	13.1476	0.708484	-0.497193	0.381098	0.696551
YDR137W	497.145	550.416	461.632	0.838695	-0.253781	0.360051	0.677972
YDR138W	297.304	293.703	299.704	1.02043	0.029183	0.976278	1
YDR139C	563.133	623.026	523.204	0.839779	-0.251918	0.352504	0.669748
YDR140W	343.878	372.379	324.878	0.872437	-0.196876	0.454611	0.757413
YDR141C	767.232	642.23	850.567	1.3244	0.405335	0.143899	0.438304
YDR142C	749.825	864.587	673.318	0.778773	-0.360724	0.17228	0.482333
YDR143C	873.237	975.2	805.261	0.82574	-0.27624	0.306756	0.624766
YDR144C	93.7429	69.7212	109.757	1.57423	0.654648	0.0790956	0.321933
YDR145W	1269.96	1225.16	1299.82	1.06094	0.0853403	0.760915	0.929207
YDR146C	405.829	194.585	546.658	2.80935	1.49024	0.000561312	0.0155824
YDR147W	137.462	115.378	152.185	1.31901	0.39946	0.196599	0.515793
YDR148C	7055.51	7599.6	6692.78	0.880675	-0.183319	0.713765	0.910434
YDR149C	2.78812	3.0929	2.58493	0.835765	-0.258831	0.957819	1
YDR150W	1404.81	1747.11	1176.61	0.673463	-0.57033	0.0344046	0.205416
YDR151C	967.678	1097.2	881.327	0.803248	-0.316082	0.224988	0.549685
YDR152W	729.21	639.546	788.987	1.23367	0.302953	0.281137	0.6
YDR153C	1244.14	1239.43	1247.28	1.00634	0.00911659	0.950524	1
YDR154C	3141.24	3647.14	2803.98	0.768816	-0.379291	0.15604	0.459284
YDR155C	12479.6	14179.5	11346.3	0.800192	-0.321582	0.219498	0.543985
YDR156W	430.327	531.402	362.944	0.682994	-0.550056	0.129554	0.417659
YDR157W	52.3127	68.8077	41.3161	0.600458	-0.735865	0.0369311	0.214942
YDR158W	12906.8	23215.9	6034.12	0.259913	-1.9439	8.59524e-14	3.98819e-11
YDR159W	404.231	384.518	417.373	1.08545	0.118288	0.676513	0.893603
YDR160W	922.714	929.897	917.926	0.987127	-0.0186925	0.947963	1
YDR161W	491.682	424.893	536.208	1.26198	0.335695	0.265161	0.58589
YDR162C	541.556	571.114	521.851	0.913741	-0.130143	0.60195	0.851496
YDR163W	800.646	949.274	701.561	0.73905	-0.436256	0.0930131	0.350734
YDR164C	596.517	517.041	649.501	1.25619	0.329053	0.239013	0.564143
YDR165W	334.303	349.993	323.844	0.925289	-0.112025	0.66099	0.882881
YDR167W	689.463	704.495	679.442	0.964438	-0.052239	0.814515	0.954473
YDR168W	1528.52	1485.66	1557.1	1.04808	0.0677533	0.797791	0.947099
YDR169C	1229.88	1250.96	1215.83	0.971917	-0.0410946	0.872412	0.978736
YDR169C-A	8.75946	13.1661	5.8217	0.442173	-1.17732	0.228484	0.554286
YDR170C	1346.41	1236.94	1419.39	1.1475	0.19849	0.460105	0.762313
YDR170W-A	684.633	673.736	691.898	1.02696	0.0383742	0.936179	0.996971
YDR171W	23289.7	28641.1	19722.2	0.688597	-0.538269	0.133959	0.424278
YDR172W	2314.75	2004.24	2521.76	1.25821	0.331374	0.2199	0.544101
YDR173C	674.457	926.275	506.579	0.546899	-0.870653	0.0011028	0.0254361
YDR174W	1710.48	1749.26	1684.63	0.963052	-0.054315	0.807902	0.951508
YDR175C	737.946	620.051	816.543	1.3169	0.397143	0.152012	0.452554
YDR176W	882.465	870.038	890.749	1.02381	0.0339412	0.912547	0.990142
YDR177W	2158.54	2635.47	1840.6	0.698394	-0.517886	0.048986	0.250957
YDR178W	8509.74	10112.7	7441.1	0.735817	-0.442581	0.40958	0.719089
YDR179C	154.974	154.349	155.391	1.00675	0.00970617	0.991629	1
YDR179W-A	188.583	228.959	161.666	0.706089	-0.502078	0.0788549	0.321933
YDR180W	125.468	99.5886	142.721	1.43311	0.519146	0.115632	0.3938
YDR181C	495.502	519.134	479.747	0.92413	-0.113832	0.681137	0.895467
YDR182W	1287.87	1323.93	1263.83	0.954603	-0.0670267	0.800729	0.948066
YDR182W-A	27.3475	27.2763	27.3949	1.00435	0.00625762	1	1
YDR183W	168.345	160.975	173.257	1.0763	0.106078	0.772767	0.934755
YDR183C-A	16.0088	11.8119	18.8067	1.59219	0.671011	0.295996	0.613544
YDR184C	118.18	90.0156	136.956	1.52146	0.60546	0.0702496	0.302916
YDR185C	413.848	618.333	277.525	0.448827	-1.15577	2.08406e-05	0.00128934
YDR186C	4428.99	4937.64	4089.9	0.82831	-0.271757	0.26033	0.581735
YDR187C	60.8362	66.6878	56.9352	0.853757	-0.228103	0.512521	0.797916
YDR188W	2525.73	2479.69	2556.41	1.03094	0.0439613	0.876764	0.980117
YDR189W	762.328	717.515	792.203	1.10409	0.142862	0.601212	0.851422
YDR190C	890.238	633.773	1061.21	1.67444	0.743677	0.00731028	0.0869735
YDR191W	77.8082	68.8077	83.8086	1.21801	0.284529	0.531191	0.810235
YDR192C	329.544	329.138	329.815	1.00206	0.00296331	0.987112	1
YDR193W	2.19722	2.44472	2.03221	0.831265	-0.26662	0.894316	0.984874
YDR194C	709.23	535.159	825.277	1.54212	0.624911	0.0242186	0.170448
YDR194W-A	0.388859	0	0.648099	Inf	Inf	0.91332	0.990142
YDR195W	600.925	676.9	550.274	0.812933	-0.298792	0.267129	0.587431
YDR196C	1502.52	1859.55	1264.5	0.680001	-0.556391	0.0379759	0.217583
YDR197W	675.289	748.307	626.611	0.837372	-0.25606	0.351578	0.668575
YDR198C	290.946	290.197	291.446	1.00431	0.00619959	0.952846	1
YDR199W	41.5521	49.192	36.4588	0.741154	-0.432155	0.268868	0.588368
YDR200C	469.791	489.768	456.474	0.932021	-0.101566	0.728085	0.915363
YDR201W	259.683	235.206	276	1.17344	0.230743	0.417026	0.725571
YDR202C	947.656	1091.42	851.812	0.780461	-0.357602	0.262893	0.583648
YDR203W	0.975874	0.471252	1.31229	2.78468	1.47751	0.826846	0.958871
YDR204W	1728.73	2141.85	1453.32	0.678533	-0.559509	0.167553	0.477588
YDR205W	671.381	676.842	667.741	0.986553	-0.0195312	0.983348	1
YDR206W	1107.01	1205.42	1041.4	0.86393	-0.211013	0.409384	0.71894
YDR207C	646.657	627.284	659.572	1.05147	0.0724129	0.847597	0.967347
YDR208W	2238.3	2599.22	1997.7	0.768576	-0.37974	0.142793	0.436761
YDR209C	216.577	209.286	221.438	1.05806	0.081428	0.72225	0.914779
YDR210W	0	0	0	NA	NA	NA	NA
YDR210W-B	99.0959	65.1551	121.723	1.86821	0.901654	0.0244789	0.171168
YDR210W-A	0	0	0	NA	NA	NA	NA
YDR210C-D	346.345	272.612	395.5	1.45078	0.536828	0.0639662	0.287652
YDR210C-C	0	0	0	NA	NA	NA	NA
YDR211W	867.993	742.28	951.801	1.28227	0.358696	0.207448	0.531498
YDR212W	1078.98	858.178	1226.17	1.42881	0.514816	0.0580061	0.275224
YDR213W	205.165	113.668	266.164	2.34158	1.22748	0.0318546	0.197709
YDR214W	1870.32	2094.83	1720.65	0.821382	-0.283874	0.422037	0.729478
YDR215C	29.2444	24.9796	32.0876	1.28455	0.361266	0.452703	0.755202
YDR216W	3655.28	3902.06	3490.75	0.894592	-0.160699	0.528533	0.808629
YDR217C	286.845	265.19	301.283	1.1361	0.184093	0.548794	0.821187
YDR218C	346.996	333.846	355.763	1.06565	0.0917336	0.878692	0.980171
YDR219C	799.083	860.032	758.451	0.881886	-0.181335	0.508709	0.795512
YDR220C	7.13125	7.51109	6.87803	0.915717	-0.127027	0.897824	0.986419
YDR221W	458.196	437.563	471.951	1.07859	0.109146	0.738619	0.920935
YDR222W	680.881	721.812	653.593	0.905489	-0.143231	0.557815	0.827977
YDR223W	781.894	1005.45	632.859	0.629432	-0.667878	0.0107248	0.108349
YDR224C	11649.9	12188.9	11290.5	0.926299	-0.11045	0.703262	0.906247
YDR225W	14508.9	17295.5	12651.2	0.731469	-0.451131	0.0911979	0.3478
YDR226W	3328.75	2336.81	3990.04	1.70748	0.771867	0.00486117	0.0677643
YDR227W	554.582	579.753	537.801	0.927639	-0.108365	0.683068	0.895467
YDR228C	536.364	538.132	535.186	0.994527	-0.00791823	0.982418	1
YDR229W	1360.93	1497.14	1270.12	0.848363	-0.237246	0.380644	0.696328
YDR230W	210.982	248.318	186.091	0.749407	-0.416179	0.164714	0.47345
YDR231C	1065.68	1254.07	940.077	0.749618	-0.415772	0.12386	0.408216
YDR232W	3110.77	2967.73	3206.13	1.08033	0.111476	0.680712	0.895467
YDR233C	9192.99	7789.07	10128.9	1.3004	0.378958	0.178886	0.491349
YDR234W	2189.54	1865.22	2405.75	1.28979	0.36714	0.361051	0.678943
YDR235W	342.602	296.353	373.434	1.2601	0.333536	0.260538	0.581892
YDR236C	379.609	408.174	360.566	0.883365	-0.178918	0.521745	0.803571
YDR237W	515.732	348.556	627.182	1.79937	0.847493	0.00258484	0.0450459
YDR238C	1574.67	1212.39	1816.2	1.49804	0.583075	0.0279031	0.185715
YDR239C	515.867	618.869	447.2	0.722608	-0.468714	0.0789783	0.321933
YDR240C	222.587	226.811	219.771	0.968961	-0.0454893	0.878176	0.980171
YDR241W	69.0792	78.704	62.6627	0.796182	-0.32883	0.379167	0.694544
YDR242W	757.167	956.317	624.4	0.652921	-0.61502	0.149301	0.447146
YDR243C	320.724	364.452	291.572	0.80003	-0.321874	0.216951	0.541743
YDR244W	764.214	859.218	700.878	0.815716	-0.293861	0.249821	0.573103
YDR245W	604.826	524.021	658.697	1.257	0.329988	0.228299	0.554196
YDR246W	1086.25	1114.09	1067.69	0.958355	-0.0613682	0.816158	0.954928
YDR246W-A	44.6231	44.6548	44.602	0.998819	-0.00170493	0.963985	1
YDR247W	1800.21	2078.79	1614.5	0.776651	-0.364662	0.147534	0.443901
YDR248C	824.378	931.867	752.718	0.807753	-0.308014	0.582093	0.842538
YDR249C	240.118	246.43	235.91	0.957312	-0.0629385	0.863094	0.97346
YDR250C	23.6946	17.7033	27.6888	1.56404	0.645281	0.171455	0.482153
YDR251W	2251.58	2171.98	2304.65	1.06109	0.0855409	0.708288	0.907836
YDR252W	95.8031	109.192	86.877	0.795634	-0.329823	0.302892	0.620103
YDR253C	244.42	318.829	194.814	0.611029	-0.710686	0.0112213	0.111118
YDR254W	588.661	787.426	456.152	0.579295	-0.78763	0.00392066	0.0586834
YDR255C	1036.39	1085.28	1003.8	0.924924	-0.112593	0.691087	0.900021
YDR256C	1858.72	1532.55	2076.17	1.35472	0.437994	0.235374	0.560995
YDR257C	261.779	224.655	286.528	1.27541	0.350963	0.268914	0.588368
YDR258C	12215.6	13797.1	11161.3	0.808958	-0.305863	0.226809	0.550991
YDR259C	365.847	436.272	318.897	0.730959	-0.452137	0.0934933	0.351468
YDR260C	320.379	361.303	293.097	0.811222	-0.301831	0.258023	0.580415
YDR261C	387.298	319.837	432.272	1.35154	0.434601	0.104239	0.371645
YDR261W-B	109.76	84.1258	126.85	1.50786	0.592502	0.308581	0.625576
YDR261W-A	0	0	0	NA	NA	NA	NA
YDR261C-D	134.935	119.296	145.361	1.21849	0.285094	0.370224	0.686208
YDR261C-C	0	0	0	NA	NA	NA	NA
YDR262W	5886.51	6599.75	5411.02	0.819882	-0.286511	0.275961	0.596124
YDR263C	347.795	394.096	316.927	0.804189	-0.314393	0.267749	0.587806
YDR264C	1136.7	1250.1	1061.1	0.848807	-0.236491	0.347181	0.664091
YDR265W	461.747	460.04	462.884	1.00618	0.00889039	1	1
YDR266C	466.452	496.041	446.726	0.900583	-0.151068	0.596116	0.848646
YDR267C	520.388	489.583	540.925	1.10487	0.143875	0.650249	0.877048
YDR268W	174.61	135.172	200.901	1.48626	0.571689	0.0685844	0.298816
YDR269C	0.78148	1.41376	0.359962	0.254614	-1.97362	0.494749	0.785628
YDR270W	731.718	894.212	623.389	0.697138	-0.520483	0.0434982	0.235774
YDR271C	1.37268	1.97347	0.972148	0.492609	-1.02149	0.6465	0.875477
YDR272W	2387.22	2592.37	2250.45	0.868105	-0.204058	0.460251	0.762313
YDR273W	496.609	610.84	420.456	0.688325	-0.538838	0.104508	0.371991
YDR274C	252.619	191.484	293.376	1.53211	0.615522	0.325071	0.641647
YDR275W	1255.73	1511.89	1084.95	0.71761	-0.478729	0.070162	0.302916
YDR276C	7043.16	8377.78	6153.41	0.734492	-0.445181	0.0907284	0.347303
YDR277C	1019.98	1166.98	921.977	0.790056	-0.339974	0.179021	0.491514
YDR278C	2.76061	2.62164	2.85325	1.08834	0.122134	1	1
YDR279W	365.248	357.238	370.588	1.03737	0.0529295	0.875632	0.979713
YDR280W	408.685	401.808	413.27	1.02853	0.0405805	0.875361	0.979713
YDR281C	53.4482	68.2463	43.5827	0.638609	-0.646995	0.332411	0.649631
YDR282C	361.373	342.985	373.633	1.08936	0.123475	0.709824	0.908526
YDR283C	529.251	512.766	540.241	1.05358	0.0753028	0.821589	0.957406
YDR284C	1483.25	1597.38	1407.17	0.880925	-0.182908	0.625298	0.863482
YDR285W	289.963	297.061	285.231	0.960175	-0.0586311	0.856571	0.971079
YDR286C	249.157	241.304	254.392	1.05424	0.0762026	0.81367	0.954424
YDR287W	1058.9	1156.16	994.067	0.859803	-0.217921	0.424605	0.731356
YDR288W	685.874	868.746	563.959	0.649164	-0.623344	0.0190551	0.148598
YDR289C	418.594	360.574	457.274	1.26818	0.342764	0.217041	0.541743
YDR290W	2.33435	0.559713	3.51744	6.28436	2.65177	0.151453	0.451508
YDR291W	346.071	324.368	360.539	1.11151	0.152525	0.599914	0.850377
YDR292C	801.691	583.547	947.12	1.62304	0.698698	0.0120066	0.114483
YDR294C	2144.69	1910.61	2300.73	1.20418	0.268057	0.314705	0.632195
YDR295C	314.272	276.324	339.57	1.22888	0.297347	0.301829	0.619112
YDR296W	899.705	763.715	990.365	1.29677	0.374926	0.164344	0.473007
YDR297W	4508.88	3343.71	5285.66	1.58078	0.660633	0.178842	0.491349
YDR298C	4813.85	4215.93	5212.47	1.23638	0.306119	0.570329	0.835933
YDR299W	154.06	88.8094	197.56	2.22454	1.15351	0.000249931	0.00892061
YDR300C	424.026	315.879	496.125	1.57062	0.651331	0.0464606	0.244379
YDR301W	364.023	360.035	366.682	1.01846	0.0263924	0.987062	1
YDR302W	269.126	249.05	282.51	1.13435	0.181867	0.551472	0.822208
YDR303C	250.427	206.161	279.937	1.35786	0.441333	0.130514	0.419296
YDR304C	1775.2	2011.64	1617.57	0.804104	-0.314546	0.258042	0.580415
YDR305C	481.697	574.751	419.662	0.730163	-0.45371	0.104707	0.372495
YDR306C	1761.35	2047.82	1570.38	0.766852	-0.38298	0.137307	0.428853
YDR307W	500.017	471.09	519.302	1.10234	0.14057	0.616315	0.859487
YDR308C	202.568	179.151	218.179	1.21785	0.284334	0.347278	0.664091
YDR309C	802.282	774.023	821.122	1.06085	0.0852195	0.89962	0.986554
YDR310C	1276.73	1320.12	1247.81	0.945227	-0.0812676	0.755701	0.928652
YDR311W	415.46	444.877	395.848	0.889793	-0.168458	0.560685	0.828752
YDR312W	337.748	288.49	370.587	1.28457	0.361289	0.219128	0.543696
YDR313C	1507.7	1917.75	1234.33	0.643637	-0.635682	0.0159733	0.134582
YDR314C	207.378	174.558	229.258	1.31336	0.393263	0.182393	0.496573
YDR315C	204.525	209.373	201.294	0.961412	-0.0567728	0.851122	0.96853
YDR316W	454.545	339.543	531.213	1.56449	0.645695	0.0522311	0.258701
YDR316W-B	96.2223	100.092	93.6425	0.935564	-0.0960924	0.790167	0.942651
YDR316W-A	0	0	0	NA	NA	NA	NA
YDR317W	235.615	236.382	235.104	0.994592	-0.00782368	0.953351	1
YDR318W	313.049	304.104	319.012	1.04902	0.0690456	0.814811	0.954473
YDR319C	912.641	995.903	857.134	0.86066	-0.216485	0.411977	0.721262
YDR320C	632.474	644.591	624.396	0.968669	-0.0459238	0.882611	0.98102
YDR320C-A	538.204	544.647	533.909	0.980285	-0.0287273	0.941999	0.999549
YDR320W-B	2.78983	1.59068	3.58926	2.25644	1.17405	0.455869	0.758536
YDR321W	329.354	247.309	384.05	1.55291	0.634979	0.0387548	0.22089
YDR322W	852.995	649.045	988.961	1.52372	0.607596	0.103068	0.369701
YDR322C-A	1685.03	1782.41	1620.12	0.908948	-0.13773	0.681639	0.895467
YDR323C	174.582	160.004	184.301	1.15185	0.203958	0.523748	0.804654
YDR324C	236.873	163.804	285.585	1.74345	0.801948	0.00719783	0.0864858
YDR325W	327.67	357.061	308.076	0.86281	-0.212886	0.426031	0.732749
YDR326C	611.075	563.492	642.797	1.14074	0.189967	0.479616	0.773675
YDR327W	673.82	708.452	650.733	0.918528	-0.122604	0.679392	0.894736
YDR328C	2074.9	2145.46	2027.85	0.945182	-0.0813354	0.76534	0.930455
YDR329C	2297.15	2751.08	1994.54	0.725002	-0.463944	0.0759625	0.316519
YDR330W	1853.01	2217.12	1610.27	0.726292	-0.461379	0.08421	0.333572
YDR331W	373.733	314.739	413.063	1.3124	0.392208	0.164617	0.47345
YDR332W	381.533	374.593	386.159	1.03088	0.0438739	0.912795	0.990142
YDR333C	447.948	397.74	481.42	1.21039	0.275471	0.342439	0.661033
YDR334W	828.443	821.613	832.996	1.01385	0.0198506	0.979856	1
YDR335W	1691.4	1636.32	1728.12	1.0561	0.0787503	0.748975	0.926289
YDR336W	341.2	337.825	343.449	1.01665	0.0238196	1	1
YDR337W	586.231	426.438	692.759	1.62452	0.700016	0.0121636	0.115399
YDR338C	852.016	949.808	786.821	0.8284	-0.271601	0.307613	0.625236
YDR339C	486.626	367.25	566.21	1.54176	0.624575	0.0327998	0.200252
YDR340W	2.99273	4.59511	1.92447	0.418809	-1.25564	0.321591	0.638362
YDR341C	2429.93	3030.03	2029.87	0.669917	-0.577945	0.251851	0.573499
YDR342C	134014	157372	118442	0.752624	-0.409999	0.571853	0.837009
YDR343C	139949	164847	123350	0.74827	-0.41837	0.565477	0.83239
YDR344C	19.7492	19.0286	20.2296	1.06311	0.0882953	0.898042	0.986419
YDR345C	22229.6	26031.9	19694.7	0.756562	-0.402469	0.582311	0.842659
YDR346C	3715.62	2901.99	4258.04	1.46728	0.553143	0.0431863	0.235351
YDR347W	1092.35	870.725	1240.1	1.42422	0.51017	0.094939	0.354235
YDR348C	1352.41	1231.27	1433.16	1.16397	0.21905	0.439208	0.742606
YDR349C	1383.65	1389.84	1379.52	0.992577	-0.0107496	0.944613	1
YDR350C	932.648	955.7	917.28	0.959799	-0.059196	0.806887	0.951508
YDR352W	451.591	386.131	495.231	1.28255	0.359013	0.255132	0.576877
YDR353W	4317.39	3719.49	4715.99	1.26791	0.342456	0.19824	0.516999
YDR354W	1464.72	2174.29	991.673	0.45609	-1.13261	0.107234	0.378207
YDR354C-A	0	0	0	NA	NA	NA	NA
YDR355C	0.44777	1.11943	0	0	#NAME?	0.444472	0.747447
YDR356W	174.615	135.557	200.654	1.48023	0.565817	0.0591922	0.277827
YDR357C	1267.56	1483.21	1123.79	0.757675	-0.400349	0.126117	0.411893
YDR358W	1927.45	2348.73	1646.59	0.701056	-0.512398	0.0573422	0.27329
YDR359C	740.581	867.77	655.788	0.755716	-0.404083	0.132521	0.421781
YDR360W	13.0554	16.259	10.9197	0.671611	-0.574301	0.423084	0.730945
YDR361C	329.846	291.427	355.459	1.21972	0.28655	0.572473	0.837424
YDR362C	664.401	733.632	618.248	0.842722	-0.246872	0.364033	0.680506
[truncated: 4,694 more rows]

## Sheet: Panel B
Supplementary File 4 - Panel B: Upregulated genes in DNMT3b-expressing strain vs. EV
id	baseMean	base EV	base DNMT3b-expressing	foldChange	log2FoldChange	pval	padj
YHR079C-A	92.152	8.36513	148.01	17.6937	4.14516	1.20294e-07	1.62798e-05
YPL121C	58.3226	8.71897	91.3916	10.4819	3.38983	9.31847e-09	1.70903e-06
YJR005C-A	42.1787	6.36271	66.056	10.3817	3.37598	1.36353e-11	4.66183e-09
YDR014W-A	104.64	17.1436	162.971	9.50623	3.24887	8.81741e-17	7.15974e-14
YMR101C	167.391	31.9599	257.679	8.06256	3.01124	1.74131e-17	1.61593e-14
YNR064C	677.829	135.967	1039.07	7.64209	2.93397	1.47698e-14	7.99538e-12
YHR153C	30.3435	8.33618	45.0151	5.39997	2.43295	1.15909e-06	0.000107564
YDR446W	74.2243	20.8541	109.804	5.26536	2.39653	8.67544e-08	1.21697e-05
YDR374C	114.561	33.4621	168.627	5.03935	2.33324	5.07359e-11	1.49809e-08
YHR014W	78.8952	23.5932	115.763	4.90664	2.29474	4.12926e-06	0.000308318
YGL033W	37.7181	11.9293	54.9107	4.60302	2.20258	1.70725e-05	0.00107673
YKL216W	2062.01	664.252	2993.85	4.50711	2.1722	9.88045e-14	4.27889e-11
YBR067C	14538.7	5217.68	20752.8	3.97739	1.99182	0.00327744	0.0528294
YAL037C-B	30.213	10.8983	43.0895	3.95378	1.98323	7.74174e-05	0.00361801
YLR120W-A	76.3973	31.1654	106.552	3.41892	1.77354	0.00540726	0.0727472
YLR367W	786.979	347.606	1079.89	3.10667	1.63537	7.64488e-05	0.00359864
YNL196C	531.014	235.557	727.985	3.09048	1.62783	1.05327e-06	0.000100496
YML058W-A	42.1892	18.7632	57.8065	3.08084	1.62332	0.000138337	0.00561596
YER179W	488.277	224.158	664.356	2.96378	1.56744	8.6817e-08	1.21697e-05
YPR119W	142.81	65.7743	194.167	2.95202	1.5617	1.93287e-06	0.000160973
YER081W	5398.97	2497.7	7333.14	2.93595	1.55383	0.00259709	0.0450459
YHR089C	1013.41	478.384	1370.09	2.86401	1.51804	1.34875e-07	1.78806e-05
YLR222C	236.488	112.108	319.407	2.8491	1.5105	1.03919e-06	0.000100496
YBR092C	1867.24	889.663	2518.95	2.83135	1.50149	1.89118e-07	2.45703e-05
YNL248C	237.518	113.728	320.044	2.81413	1.49269	1.38912e-06	0.000125329
YDR146C	405.829	194.585	546.658	2.80935	1.49024	0.000561312	0.0155824
YMR116C	4670.95	2247.73	6286.43	2.79679	1.48377	0.00801649	0.0928255
YLR194C	6407.56	3085.22	8622.45	2.79476	1.48272	5.139e-05	0.00258782
YKL152C	19432.7	9378.06	26135.8	2.78691	1.47866	5.98108e-05	0.00289948
YEL026W	447.564	216.59	601.547	2.77736	1.47372	3.58157e-05	0.00193545
YOR198C	1184.27	575.537	1590.1	2.76281	1.46614	2.07074e-07	2.63755e-05
YOL131W	184.447	89.8098	247.539	2.75626	1.46271	4.0078e-06	0.000302729
YLL046C	28.4152	13.8738	38.1095	2.74687	1.45779	0.00229123	0.0419987
YPL021W	22.934	11.2811	30.7026	2.7216	1.44445	0.00888122	0.0988987
YDR044W	722.422	355.535	967.014	2.71988	1.44355	0.00032253	0.0106353
YPL256C	338.33	168.252	451.715	2.68476	1.42479	0.000117528	0.00505605
YKL153W	2069.11	1039.83	2755.3	2.64975	1.40585	3.5103e-07	4.22276e-05
YLR186W	198.846	102.801	262.876	2.55715	1.35454	1.2447e-05	0.000808557
YGR142W	1437.22	745.066	1898.66	2.54831	1.34954	1.53349e-06	0.000134616
YMR032W	147.998	76.8206	195.45	2.54424	1.34723	0.000774962	0.0195122
YFL037W	1629.11	846.36	2150.95	2.54141	1.34563	0.00257635	0.0450459
YGL253W	3844.16	2002.51	5071.92	2.53279	1.34073	1.38542e-06	0.000125329
YNR066C	130.757	68.1305	172.507	2.53201	1.34028	5.36179e-05	0.00265879
YAL038W	21074.7	10994.5	27794.8	2.52806	1.33803	0.000316883	0.0105024
YNL061W	1066.99	557.059	1406.94	2.52566	1.33666	3.03495e-06	0.000231942
YCR072C	96.7486	50.81	127.374	2.50688	1.32589	0.00226775	0.0419695
YDL014W	1633.89	858.213	2151.01	2.50639	1.32561	1.19284e-05	0.000782698
YGR189C	8883.06	4722.79	11656.6	2.46815	1.30343	0.00326182	0.0527084
YLR313C	74.632	39.8232	97.8379	2.4568	1.29678	0.0066818	0.0833093
YJL034W	4438.84	2371.65	5816.96	2.45271	1.29437	0.000304769	0.0103114
YPL211W	261.546	139.883	342.655	2.44958	1.29253	0.00386162	0.0579472
YLL034C	135.48	72.7562	177.297	2.43686	1.28502	6.81614e-05	0.00323194
YOL152W	1049.39	566.474	1371.34	2.42083	1.2755	0.00396834	0.0591246
YJL080C	795.727	430.376	1039.29	2.41486	1.27194	0.00460845	0.0653635
YKL009W	248.055	134.436	323.802	2.4086	1.2682	2.82115e-05	0.00162179
YFL056C	714.673	388.64	932.029	2.39818	1.26194	0.0002818	0.00974091
YKL060C	119376	65858.2	155054	2.35435	1.23533	7.22185e-06	0.000509925
YOR310C	1202.68	665.067	1561.08	2.34725	1.23097	0.000129925	0.00544487
YBR038W	495.652	274.441	643.126	2.3434	1.22861	0.00316907	0.0518553
YMR122W-A	6289.45	3486.83	8157.86	2.33962	1.22627	0.00565166	0.0747722
YER044C-A	63.3891	35.1702	82.2016	2.33725	1.22481	0.000968813	0.0229686
YJR063W	84.4046	46.9226	109.393	2.33134	1.22116	0.00058018	0.0158355
YDL055C	9175.87	5109.56	11886.7	2.32637	1.21808	0.00674329	0.083437
YHR174W	60684.7	33961.2	78500.3	2.31147	1.20881	8.07789e-06	0.000557294
YMR049C	444.873	248.989	575.463	2.3112	1.20864	3.51449e-05	0.0019185
YLL011W	230.455	129.221	297.944	2.30569	1.2052	8.64548e-05	0.00398305
YGR285C	1353.57	760.05	1749.26	2.3015	1.20258	1.66417e-05	0.00105985
YHR149C	192.08	108.071	248.086	2.29558	1.19886	0.00723676	0.0867343
YMR241W	1857.12	1045.82	2397.99	2.29294	1.1972	0.00496965	0.0685445
YJL157C	497.759	280.714	642.456	2.28865	1.1945	0.00426424	0.061576
YDL219W	66.4307	37.5265	85.7001	2.28372	1.19139	0.00134534	0.0296248
YNL067W	1462.63	827.336	1886.16	2.2798	1.18891	0.000212964	0.00777199
YDL157C	193.773	109.691	249.829	2.27757	1.1875	0.00637178	0.080371
YDL101C	304.931	173.083	392.83	2.2696	1.18244	5.46278e-05	0.00268835
YOR209C	2583.55	1467.97	3327.26	2.26657	1.18051	0.00109469	0.0254361
YGL078C	1261.33	718.825	1622.99	2.25784	1.17494	3.87368e-05	0.00204581
YOR309C	56.5084	32.3717	72.5996	2.24269	1.16523	0.00259333	0.0450459
YLR435W	146.76	84.1547	188.497	2.23989	1.16343	0.000281905	0.00974091
YPR194C	1048.07	602.571	1345.07	2.23222	1.15848	4.57977e-05	0.00234253
YBR084W	491.075	282.594	630.062	2.22957	1.15676	0.00205552	0.0391573
YDR299W	154.06	88.8094	197.56	2.22454	1.15351	0.000249931	0.00892061
YNL024C	68.2933	39.3825	87.5671	2.2235	1.15283	0.00148637	0.0315678
YGL240W	67.1572	38.7633	86.0865	2.22082	1.15109	0.00186148	0.0366429
YMR001C	323.044	188.605	412.67	2.18801	1.12962	0.000161338	0.00620147
YLR409C	293.601	171.697	374.87	2.18333	1.12653	0.000159332	0.00616083
YPL012W	514.007	301.508	655.672	2.17464	1.12078	9.75385e-05	0.00436973
YLR134W	1252.81	737.023	1596.66	2.16637	1.11528	0.00415152	0.0607394
YNL175C	227.674	134.346	289.893	2.15782	1.10957	0.000423765	0.0128634
YHR013C	217.667	128.662	277.004	2.15296	1.10632	0.000309628	0.0104037
YJL074C	174.462	103.241	221.942	2.14974	1.10416	0.000436685	0.013194
YNR063W	158.115	93.6393	201.099	2.1476	1.10272	0.000514994	0.0146728
YML130C	641.488	381.222	814.999	2.13786	1.09617	9.97226e-05	0.00442919
YDR449C	109.324	65.2146	138.729	2.12728	1.08901	0.00136891	0.0300421
YAR002C-A	869.96	519.244	1103.77	2.12572	1.08795	0.00225594	0.0418702
YLR293C	1874.52	1121.44	2376.57	2.11922	1.08354	9.61192e-05	0.00433605
YLR060W	1141.27	684.233	1445.96	2.11326	1.07947	9.45469e-05	0.00429494
YPR041W	1034.83	620.516	1311.04	2.11282	1.07917	0.000126557	0.00536863
YMR260C	1090.99	654.264	1382.14	2.11251	1.07896	0.000139441	0.00561596
YNL209W	15281.5	9176.39	19351.6	2.10884	1.07645	0.000294405	0.0100655
YOR361C	1489.55	895.19	1885.79	2.10658	1.0749	0.000117374	0.00505605
YKL081W	1900.26	1144.4	2404.16	2.10081	1.07095	0.00321418	0.0522553
YGR084C	488.86	294.948	618.135	2.09574	1.06746	0.00260734	0.0450459
YHR123W	150.867	91.1077	190.706	2.09319	1.06571	0.00843922	0.095772
YDR050C	35894	21715.1	45346.7	2.08826	1.0623	8.78153e-05	0.00401724
YGL028C	1502.26	909.195	1897.64	2.08716	1.06154	0.000121193	0.00517941
YDL229W	8952.25	5419.82	11307.2	2.08627	1.06092	0.00330124	0.0530648
YAL025C	289.86	175.613	366.025	2.08427	1.05954	0.000419642	0.0127981
YDR055W	17185.8	10423.1	21694.3	2.08137	1.05753	0.000141997	0.00565898
YNL132W	276.411	168.133	348.597	2.07335	1.05196	0.000504474	0.0145647
YLR287C	196.267	119.415	247.501	2.07261	1.05145	0.00061075	0.0163269
YGR128C	202.488	123.418	255.201	2.06778	1.04808	0.000706692	0.0184364
YKR079C	197.111	120.15	248.418	2.06757	1.04793	0.000720378	0.0185697
YOL077C	398.584	243.711	501.833	2.05913	1.04203	0.00144589	0.0312044
YNR017W	1125.31	691.213	1414.71	2.04671	1.03331	0.000206373	0.00761705
YJR143C	649.495	399.212	816.35	2.0449	1.03203	0.000449932	0.0134689
YGR254W	173200	106521	217652	2.04328	1.03089	0.000130757	0.00544487
YLR200W	290.369	178.59	364.888	2.04316	1.0308	0.000558027	0.0155577
YNL058C	319.524	196.795	401.344	2.0394	1.02814	0.00132228	0.0294835
YHR065C	311.827	192.435	391.422	2.03405	1.02435	0.000494303	0.0144518
YLR175W	1769.5	1093.18	2220.38	2.03112	1.02228	0.00027141	0.00958197
YOR315W	84.0022	51.9005	105.403	2.03087	1.0221	0.0036281	0.0567409
YAR018C	243.886	150.757	305.972	2.02956	1.02117	0.000527407	0.0149609
YER006W	937.101	580.181	1175.05	2.02531	1.01814	0.000537551	0.0150514
YHR052W	373.055	231.111	467.685	2.02363	1.01695	0.00043905	0.013204
YLR044C	77439.3	47984.3	97075.9	2.02308	1.01655	0.000188049	0.00706107
YDR507C	587.967	365.837	736.054	2.01198	1.00861	0.000456794	0.0135587
YNL182C	162.568	101.268	203.435	2.00888	1.00639	0.00148554	0.0315678
YGR159C	632.235	394.501	790.724	2.00437	1.00315	0.000417599	0.0127958

## Sheet: Panel C
Supplementary File 4 - Panel C: Downregulated genes in DNMT3b-expressing strain vs. EV
id	baseMean	base EV	base DNMT3b-expressing	foldChange	log2FoldChange	pval	padj
YGL009C	70531.6	165480	7232.32	0.043705	-4.51606	1.35672e-57	8.81326e-54
YKL120W	4344.95	9954.6	605.178	0.0607938	-4.03993	1.70281e-47	5.53072e-44
YMR290W-A	53.0542	118.328	9.53852	0.080611	-3.63288	9.30163e-06	0.000622922
YHR208W	26609.1	57740.7	5854.73	0.101397	-3.30191	1.80074e-34	3.8992e-31
YCL018W	15662.1	33562.7	3728.39	0.111087	-3.17023	2.61491e-32	4.24661e-29
YOR225W	198.8	415.559	54.2937	0.130652	-2.9362	1.27396e-22	1.37927e-19
YOR226C	794.187	1645.79	226.453	0.137595	-2.8615	2.94692e-25	3.82864e-22
YFR034W-A	11.7369	24.0065	3.55708	0.148171	-2.75466	1.83705e-05	0.00114745
YHR028W-A	64.0117	125.479	23.0337	0.183567	-2.44562	0.000325148	0.0106675
YER073W	4016.88	7718.54	1549.11	0.2007	-2.31689	3.02094e-07	3.70265e-05
YEL021W	16182.1	30926.4	6352.65	0.205412	-2.28341	8.35047e-07	8.47573e-05
YMR108W	21945.3	41921.9	8627.56	0.205801	-2.28068	1.47978e-10	3.84507e-08
YHR029C	1504.19	2842.04	612.28	0.215437	-2.21467	0.00442311	0.0632875
YOR186W	333.074	622.362	140.215	0.225295	-2.15011	0.000769872	0.0194595
YBR047W	1132.69	2116.29	476.966	0.225379	-2.14958	6.61208e-10	1.59082e-07
YFR030W	1663.07	3104.49	702.128	0.226166	-2.14455	0.00013516	0.00559233
YLR355C	52887.3	98381.1	22558.1	0.229293	-2.12473	4.3224e-16	3.11981e-13
YLR164W	1538.51	2859.16	658.069	0.230161	-2.11928	8.12286e-07	8.37557e-05
YNL104C	35506.5	65690.8	15383.6	0.234183	-2.09429	9.64235e-16	6.26367e-13
YAR035C-A	10.128	18.6748	4.43012	0.237225	-2.07567	0.00173198	0.0346863
YOR108W	876.564	1614.3	384.737	0.23833	-2.06897	0.00766134	0.0901596
YNL103W-A	307.856	561.628	138.674	0.246914	-2.01792	1.64717e-11	5.35001e-09
YGR067C	5339.88	9732.2	2411.67	0.247803	-2.01274	1.2065e-14	7.12494e-12
YOL047C	410.951	748.326	186.034	0.248601	-2.0081	5.14472e-13	2.08876e-10
YBR068C	25223.6	45921	11425.4	0.248805	-2.00691	1.62316e-14	8.11082e-12
YGR088W	16948.3	30850.1	7680.39	0.248958	-2.00602	0.000340525	0.0108968
YDR126W	917.387	1667.5	417.312	0.250262	-1.99849	9.2756e-07	9.26989e-05
YPL250C	5499.31	9956.64	2527.76	0.253876	-1.9778	0.00382685	0.0579469
YER175C	4384.4	7891.37	2046.42	0.259324	-1.94717	2.63543e-05	0.00154232
YDR158W	12906.8	23215.9	6034.12	0.259913	-1.9439	8.59524e-14	3.98819e-11
YGL015C	48.1004	86.1877	22.7088	0.26348	-1.92423	3.86308e-07	4.48117e-05
YGR069W	38.0379	67.9263	18.1123	0.266647	-1.907	2.10636e-06	0.000171036
YBR256C	5758.76	10200.3	2797.71	0.274276	-1.8663	5.81856e-13	2.22337e-10
YJR016C	24272	42975.6	11803	0.274645	-1.86436	5.17392e-08	8.61789e-06
YIL163C	106.247	185.776	53.227	0.286511	-1.80334	8.94989e-09	1.70903e-06
YIL164C	816.739	1425.58	410.846	0.288197	-1.79488	5.28466e-05	0.0026407
YDL085W	5213.43	9091.18	2628.26	0.2891	-1.79036	7.14737e-12	2.57941e-09
YOR202W	1450.19	2511.76	742.482	0.295602	-1.75827	0.000588905	0.0159576
YLR307C-A	5136.34	8886.83	2636.01	0.29662	-1.75331	0.0059129	0.0763622
YMR107W	19435.9	33488.3	10067.6	0.300631	-1.73393	2.55678e-11	7.90899e-09
YBR111C	7075.98	12191.3	3665.75	0.300685	-1.73368	0.000874857	0.0215268
YIL121W	863.84	1486.73	448.578	0.30172	-1.72872	1.30635e-10	3.53585e-08
YIL165C	711.061	1217.54	373.412	0.306695	-1.70513	3.12424e-05	0.00176479
YCL048W-A	1088.48	1862.42	572.525	0.30741	-1.70177	1.14099e-10	3.22257e-08
YOR376W	180.685	308.669	95.3625	0.308948	-1.69457	7.66054e-09	1.50796e-06
YKL030W	111.962	190.901	59.3368	0.310826	-1.68582	9.50644e-07	9.35664e-05
YPL160W	2350.85	3991.49	1257.08	0.314941	-1.66685	4.70874e-05	0.00238969
YKR071C	2848.52	4806.02	1543.51	0.321163	-1.63862	2.91295e-10	7.27789e-08
YJL025W	470.887	792.001	256.811	0.324256	-1.6248	1.64163e-09	3.67725e-07
YGL180W	1922.53	3222.89	1055.62	0.327538	-1.61027	0.00249713	0.0440798
YNL195C	7541.66	12576.5	4185.12	0.332774	-1.58739	0.000393082	0.0122175
YGL125W	3715.69	6193.23	2064	0.333267	-1.58525	1.05929e-09	2.45756e-07
YGR154C	864.011	1436.87	482.101	0.335521	-1.57553	2.1168e-09	4.58357e-07
YNR068C	449.712	744.371	253.272	0.34025	-1.55533	6.41471e-09	1.30219e-06
YOL048C	2142.18	3542.46	1208.66	0.341192	-1.55134	3.35136e-09	7.02273e-07
YDR525W	19.5397	32.1947	11.103	0.344871	-1.53587	0.00155608	0.0325025
YGL223C	589.821	971.46	335.394	0.345248	-1.5343	0.0023998	0.0428272
YGL182C	17.2659	28.4247	9.82665	0.345708	-1.53237	0.0027862	0.0470108
YMR062C	5519.65	9076.73	3148.26	0.346849	-1.52762	0.00875165	0.0982453
YKL065W-A	812.002	1335.18	463.218	0.346934	-1.52727	0.000802411	0.0200479
YEL039C	4491.1	7380.41	2564.9	0.347529	-1.5248	9.47125e-09	1.70903e-06
YOL052C-A	32439.7	53220.3	18586	0.349227	-1.51776	0.00155326	0.0325025
YOL118C	266.227	435.534	153.357	0.352112	-1.50589	7.16656e-08	1.13546e-05
YMR118C	2543.28	4156.55	1467.77	0.353122	-1.50176	0.000376952	0.0118294
YLR311C	471.855	770.255	272.921	0.354326	-1.49685	4.22983e-06	0.000312239
YLR437C-A	115.329	187.396	67.2835	0.359045	-1.47776	1.43157e-06	0.00012739
YGL117W	5220.63	8482.26	3046.2	0.359126	-1.47744	0.000457106	0.0135587
YOR271C	958.256	1553.26	561.586	0.361553	-1.46772	3.50649e-08	5.99426e-06
YMR174C	2382.34	3857.7	1398.76	0.362588	-1.4636	0.00625242	0.0794828
YNL072W	581.63	941.356	341.813	0.363107	-1.46154	8.22845e-08	1.21482e-05
YHR022C	232.742	374.942	137.943	0.367904	-1.4426	3.65808e-07	4.32052e-05
YBR046C	3364.45	5410.46	2000.44	0.369736	-1.43543	2.23609e-08	3.92584e-06
YIL050W	3775.19	6070.92	2244.7	0.369746	-1.43539	2.06787e-06	0.000170037
YHR063C	929.953	1493.11	554.515	0.371383	-1.42902	7.99757e-08	1.20819e-05
YDR406W-A	38.268	61.3577	22.8749	0.372812	-1.42348	0.00130086	0.0293415
YKL029C	1575.83	2526.23	942.226	0.372976	-1.42284	0.000742742	0.018921
YDR070C	5233.98	8385.5	3132.97	0.373618	-1.42037	0.00891319	0.0989745
YLR312C	3184.27	5088.45	1914.81	0.376306	-1.41002	7.03524e-08	1.13546e-05
YLR438W	3927.99	6274.77	2363.46	0.376661	-1.40866	7.86901e-08	1.20819e-05
YER053C-A	3267.12	5211.17	1971.09	0.378243	-1.40262	8.80503e-08	1.21697e-05
YJL213W	251.292	400.688	151.695	0.378585	-1.40131	5.80302e-07	6.38922e-05
YLL055W	2649.94	4224.2	1600.43	0.378872	-1.40022	0.0037038	0.0572631
YHR021W-A	198.321	314.033	121.18	0.385884	-1.37376	2.15631e-06	0.000172931
YOR161C	2631.95	4154.18	1617.14	0.389279	-1.36112	2.25496e-07	2.81696e-05
YPR149W	35386.2	55849.4	21744.2	0.389336	-1.36091	0.00797271	0.0926489
YBL029C-A	1835.36	2889.14	1132.84	0.392102	-1.3507	3.23437e-05	0.00181125
YIL056W	2452.14	3859.76	1513.73	0.392181	-1.35041	1.06746e-06	0.000100496
YJL163C	2472.69	3881.68	1533.36	0.395024	-1.33999	4.00079e-07	4.55949e-05
YPL018W	971.657	1522.83	604.206	0.396764	-1.33365	8.08208e-07	8.37557e-05
YBL095W	817.048	1279	509.08	0.39803	-1.32905	5.71695e-07	6.38922e-05
YNL117W	7373.54	11523.3	4607.04	0.399802	-1.32264	4.37134e-05	0.00225875
YER174C	1020.73	1594.34	638.322	0.400369	-1.3206	4.8649e-06	0.000355083
YDL054C	2684.71	4187.25	1683.01	0.401937	-1.31496	0.000589566	0.0159576
YBL029W	1865.81	2906.59	1171.96	0.403209	-1.3104	7.00816e-07	7.56099e-05
YNR069C	420.828	655.261	264.54	0.403717	-1.30858	0.00183802	0.036291
YLR290C	1359.12	2110.87	857.95	0.406444	-1.29887	7.10006e-07	7.56099e-05
YLR089C	8552.17	13281	5399.61	0.406565	-1.29844	0.00233173	0.0420893
YJL185C	859.488	1330.27	545.631	0.410164	-1.28573	1.75028e-06	0.00014766
YGL075C	338.817	524.156	215.257	0.410673	-1.28394	0.0013216	0.0294835
YGR066C	678.12	1040.79	436.341	0.419241	-1.25415	2.6796e-06	0.000207222
YMR094W	415.973	637.265	268.445	0.421245	-1.24727	0.00193628	0.0380003
YHR096C	8702.61	13329	5618.33	0.421511	-1.24636	1.64685e-06	0.000140762
YBR105C	2006.27	3071.3	1296.24	0.422051	-1.24451	1.64234e-06	0.000140762
YDR080W	637.8	974.51	413.327	0.424138	-1.23739	2.61851e-06	0.000204938
YIL046W-A	28.4071	43.36	18.4384	0.425239	-1.23365	0.00788322	0.0921197
YKL121W	1402.38	2139.07	911.254	0.426004	-1.23106	2.23262e-06	0.000176867
YGR096W	983.084	1498.02	639.795	0.427094	-1.22737	3.02642e-05	0.00172453
YOL164W-A	217.903	331.442	142.211	0.429069	-1.22072	2.55875e-05	0.00151106
YCR014C	630.195	955.939	413.032	0.432069	-1.21067	6.40023e-06	0.000456878
YER052C	1716.18	2596.11	1129.56	0.435099	-1.20058	0.000374705	0.0118159
YKL033W-A	1087.72	1641.22	718.727	0.437922	-1.19125	0.00181176	0.0358817
YGR068C	473.119	712.249	313.699	0.440435	-1.183	1.30431e-05	0.000838892
YKL162C-A	79.2371	119.146	52.6309	0.441733	-1.17875	0.00379089	0.0576549
YOR185C	2833.31	4260.34	1881.96	0.441738	-1.17874	0.000509581	0.0146471
YBR297W	1544.47	2320.46	1027.14	0.442645	-1.17578	8.15007e-06	0.000557294
YGL118C	94.1777	141.327	62.7445	0.443965	-1.17148	0.000194934	0.00727753
YCL009C	8850.89	13266	5907.49	0.445311	-1.16711	6.06347e-06	0.000437648
YMR057C	34.4137	51.5772	22.9714	0.445378	-1.1669	0.00440306	0.0631396
YMR271C	5155.78	7726.66	3441.86	0.445453	-1.16666	0.00023193	0.00837008
YPL054W	3063.51	4583.03	2050.49	0.44741	-1.16033	7.81506e-06	0.000545878
YDR185C	413.848	618.333	277.525	0.448827	-1.15577	2.08406e-05	0.00128934
YOR303W	15361.3	22951	10301.6	0.448851	-1.15569	0.00434558	0.0625918
YPL188W	1304.67	1947.37	876.196	0.449938	-1.1522	1.02413e-05	0.00067885
YNL014W	1631.25	2432.36	1097.18	0.451074	-1.14856	8.69179e-06	0.000588144
YPL177C	3565.99	5313.37	2401.07	0.451892	-1.14595	0.000136474	0.00561099
YIL051C	3800.81	5648.02	2569.35	0.454911	-1.13634	5.89773e-05	0.00288058
YPL017C	1246.97	1850.08	844.901	0.456682	-1.13074	2.16743e-05	0.00130827
YOR339C	183.556	271.99	124.6	0.458106	-1.12625	0.00362197	0.0567409
YKL105C	1204.67	1784.23	818.307	0.458634	-1.12458	2.18297e-05	0.00130827
YBR045C	487.584	721.729	331.488	0.459297	-1.1225	3.73397e-05	0.00198819
YNR034W	1023.19	1514.31	695.776	0.459469	-1.12196	2.17121e-05	0.00130827
YLR140W	31.0945	45.9801	21.1707	0.460432	-1.11894	0.00679835	0.0839583
YJR025C	4098.67	6056.98	2793.13	0.461142	-1.11672	0.00041458	0.0127635
YML054C-A	34.4116	50.8406	23.4589	0.461421	-1.11585	0.00573786	0.0751546
YKL050C	757.853	1119.6	516.685	0.461489	-1.11563	3.60513e-05	0.00193545
YOR298W	175.893	259.124	120.405	0.464659	-1.10576	0.000144808	0.00573582
YNL191W	304.329	447.817	208.67	0.465971	-1.10169	6.70378e-05	0.00320204
YPL004C	28262.6	41548.6	19405.3	0.46705	-1.09835	2.74414e-05	0.0015916
YJL089W	1229.51	1804.91	845.908	0.468671	-1.09335	0.000277458	0.00974091
YMR182W-A	37.3282	54.7891	25.6876	0.468845	-1.09282	0.00777457	0.0913266
YMR173W-A	738.883	1083.94	508.844	0.469438	-1.09099	0.00714246	0.0864438
YDR461C-A	435.075	638.137	299.701	0.46965	-1.09034	8.06439e-05	0.00374188
YIL113W	613.085	899.082	422.42	0.469835	-1.08977	6.1761e-05	0.00297185
YKL106W	580.982	851.688	400.511	0.470255	-1.08848	4.33084e-05	0.00225875
YIL074C	1325.45	1941.63	914.665	0.47108	-1.08595	0.00762592	0.0899056
YHR047C	870.129	1274.14	600.792	0.471529	-1.08458	3.41334e-05	0.00189513
YOR107W	324.379	474.969	223.985	0.471577	-1.08443	0.00017225	0.00654349
YOL119C	6658.29	9735.68	4606.69	0.473175	-1.07955	2.19521e-05	0.00130827
YER042W	1052.93	1536.62	730.467	0.475372	-1.07287	3.48358e-05	0.00191774
YGL026C	4387.15	6391.33	3051.02	0.477369	-1.06682	0.0021574	0.0406843
YFL028C	1265.41	1839.78	882.5	0.479678	-1.05986	0.00310768	0.0514986
YPL230W	9702.59	14102.3	6769.48	0.480028	-1.05881	4.38119e-05	0.00225875
YNL241C	13743.8	19940.6	9612.66	0.482065	-1.0527	0.00260279	0.0450459
YLR154W-F	2956.46	4272.58	2079.06	0.486605	-1.03918	0.000152565	0.00597027
YGR281W	2525.66	3630.4	1789.16	0.492829	-1.02084	0.00010023	0.00442919
YGR029W	822.835	1181.26	583.887	0.494293	-1.01656	0.000100944	0.00443063
YPL119C-A	359.133	515.04	255.194	0.495484	-1.01309	0.000246472	0.00884577
YGL154C	682.915	979.106	485.454	0.495813	-1.01213	0.000127273	0.00536863
YBL048W	1448.55	2075.42	1030.64	0.496595	-1.00986	0.00844787	0.095772

## Sheet: Panel D
Supplementary File 4 - Panel D: GO term Analysis for upregulated genes in DNMT3b-expressing strain vs. EV
GOID	GO_term	Cluster frequency	Background frequency	P-value	FDR	Expected FP	Gene(s) annotated to the term
42254	ribosome biogenesis	35 out of 128 genes, 27.3%	413 out of 7164 background genes, 5.8%	1.35e-12	0	0	MAK16/YAL025C:RSA4/YCR072C:NOP1/YDL014W:SSB1/YDL229W:BFR2/YDR299W:UTP6/YDR449C:SNU13/YEL026W:NUG1/YER006W:DBP3/YGL078C:UTP8/YGR128C:NSR1/YGR159C:ZUO1/YGR285C:CIC1/YHR052W:RRP3/YHR065C:GAR1/YHR089C:MRT4/YKL009W:SOF1/YLL011W:RIX7/YLL034C:RNP1/YLL046C:CBF5/YLR175W:EMG1/YLR186W:UTP13/YLR222C:GSP1/YLR293C:UTP21/YLR409C:TSR2/YLR435W:ERB1/YMR049C:NOP2/YNL061W:KRE33/YNL132W:IPI3/YNL182C:SSB2/YNL209W:BRX1…
22613	ribonucleoprotein complex biogenesis	36 out of 128 genes, 28.1%	495 out of 7164 background genes, 6.9%	5.87e-11	0	0	MAK16/YAL025C:RSA4/YCR072C:NOP1/YDL014W:SSB1/YDL229W:BFR2/YDR299W:UTP6/YDR449C:SNU13/YEL026W:NUG1/YER006W:DBP3/YGL078C:UTP8/YGR128C:NSR1/YGR159C:ZUO1/YGR285C:CIC1/YHR052W:RRP3/YHR065C:GAR1/YHR089C:MRT4/YKL009W:SOF1/YLL011W:RIX7/YLL034C:RNP1/YLL046C:CBF5/YLR175W:EMG1/YLR186W:UTP13/YLR222C:GSP1/YLR293C:UTP21/YLR409C:TSR2/YLR435W:ERB1/YMR049C:TIF11/YMR260C:NOP2/YNL061W:KRE33/YNL132W:IPI3/YNL182C:SSB…
6364	rRNA processing	28 out of 128 genes, 21.9%	305 out of 7164 background genes, 4.3%	1.99e-10	0	0	MAK16/YAL025C:NOP1/YDL014W:SSB1/YDL229W:BFR2/YDR299W:UTP6/YDR449C:SNU13/YEL026W:NUG1/YER006W:DBP3/YGL078C:UTP8/YGR128C:NSR1/YGR159C:ZUO1/YGR285C:RRP3/YHR065C:GAR1/YHR089C:MRT4/YKL009W:SOF1/YLL011W:CBF5/YLR175W:EMG1/YLR186W:UTP13/YLR222C:GSP1/YLR293C:UTP21/YLR409C:TSR2/YLR435W:ERB1/YMR049C:NOP2/YNL061W:IPI3/YNL182C:SSB2/YNL209W:NOP58/YOR310C:RRP12/YPL012W:NIP7/YPL211W
16072	rRNA metabolic process	28 out of 128 genes, 21.9%	322 out of 7164 background genes, 4.5%	7.7e-10	0	0	MAK16/YAL025C:NOP1/YDL014W:SSB1/YDL229W:BFR2/YDR299W:UTP6/YDR449C:SNU13/YEL026W:NUG1/YER006W:DBP3/YGL078C:UTP8/YGR128C:NSR1/YGR159C:ZUO1/YGR285C:RRP3/YHR065C:GAR1/YHR089C:MRT4/YKL009W:SOF1/YLL011W:CBF5/YLR175W:EMG1/YLR186W:UTP13/YLR222C:GSP1/YLR293C:UTP21/YLR409C:TSR2/YLR435W:ERB1/YMR049C:NOP2/YNL061W:IPI3/YNL182C:SSB2/YNL209W:NOP58/YOR310C:RRP12/YPL012W:NIP7/YPL211W
34470	ncRNA processing	29 out of 128 genes, 22.7%	412 out of 7164 background genes, 5.8%	5.51e-08	0	0	MAK16/YAL025C:NOP1/YDL014W:SSB1/YDL229W:BFR2/YDR299W:UTP6/YDR449C:SNU13/YEL026W:NUG1/YER006W:DBP3/YGL078C:UTP8/YGR128C:NSR1/YGR159C:ZUO1/YGR285C:RRP3/YHR065C:GAR1/YHR089C:MRT4/YKL009W:TRZ1/YKR079C:SOF1/YLL011W:CBF5/YLR175W:EMG1/YLR186W:UTP13/YLR222C:GSP1/YLR293C:UTP21/YLR409C:TSR2/YLR435W:ERB1/YMR049C:NOP2/YNL061W:IPI3/YNL182C:SSB2/YNL209W:NOP58/YOR310C:RRP12/YPL012W:NIP7/YPL211W
34660	ncRNA metabolic process	31 out of 128 genes, 24.2%	473 out of 7164 background genes, 6.6%	6.69e-08	0	0	MAK16/YAL025C:NOP1/YDL014W:DTD1/YDL219W:SSB1/YDL229W:BFR2/YDR299W:UTP6/YDR449C:SNU13/YEL026W:NUG1/YER006W:DBP3/YGL078C:UTP8/YGR128C:NSR1/YGR159C:ZUO1/YGR285C:RRP3/YHR065C:GAR1/YHR089C:MRT4/YKL009W:TRZ1/YKR079C:SOF1/YLL011W:FRS1/YLR060W:CBF5/YLR175W:EMG1/YLR186W:UTP13/YLR222C:GSP1/YLR293C:UTP21/YLR409C:TSR2/YLR435W:ERB1/YMR049C:NOP2/YNL061W:IPI3/YNL182C:SSB2/YNL209W:NOP58/YOR310C:RRP12/YPL012W:NIP…
44085	cellular component biogenesis	47 out of 128 genes, 36.7%	1097 out of 7164 background genes, 15.3%	9.79e-07	0	0	MAK16/YAL025C:RSA4/YCR072C:NOP1/YDL014W:PSA1/YDL055C:SSB1/YDL229W:BFR2/YDR299W:UTP6/YDR449C:GIN4/YDR507C:SNU13/YEL026W:NUG1/YER006W:DBP3/YGL078C:DOC1/YGL240W:UTP8/YGR128C:NSR1/YGR159C:ZUO1/YGR285C:CIC1/YHR052W:RRP3/YHR065C:SAE3/YHR079C-A:GAR1/YHR089C:SPO16/YHR153C:SMC3/YJL074C:MRT4/YKL009W:SOF1/YLL011W:RIX7/YLL034C:RNP1/YLL046C:CBF5/YLR175W:EMG1/YLR186W:YKE2/YLR200W:UTP13/YLR222C:GSP1/YLR293C:SPH…
71840	cellular component organization or biogenesis	73 out of 128 genes, 57.0%	2274 out of 7164 background genes, 31.7%	1.29e-06	0	0	MAK16/YAL025C:TIP1/YBR067C:RSA4/YCR072C:NOP1/YDL014W:PSA1/YDL055C:SSB1/YDL229W:PST1/YDR055W:SWI5/YDR146C:BFR2/YDR299W:ECM11/YDR446W:UTP6/YDR449C:GIN4/YDR507C:SNU13/YEL026W:NUG1/YER006W:MEI4/YER044C-A:DMC1/YER179W:TUB2/YFL037W:HOP2/YGL033W:DBP3/YGL078C:DOC1/YGL240W:HXK2/YGL253W:MRP13/YGR084C:UTP8/YGR128C:NSR1/YGR159C:CRH1/YGR189C:ENO1/YGR254W:ZUO1/YGR285C:ARD1/YHR013C:SPO13/YHR014W:CIC1/YHR052W:RR…
6090	pyruvate metabolic process	9 out of 128 genes, 7.0%	38 out of 7164 background genes, 0.5%	8.3e-06	0	0	CDC19/YAL038W:TPI1/YDR050C:HXK2/YGL253W:ENO1/YGR254W:ENO2/YHR174W:FBA1/YKL060C:GPM1/YKL152C:PDC1/YLR044C:PDC5/YLR134W
6096	glycolytic process	7 out of 128 genes, 5.5%	22 out of 7164 background genes, 0.3%	3.79e-05	0	0	CDC19/YAL038W:TPI1/YDR050C:HXK2/YGL253W:ENO1/YGR254W:ENO2/YHR174W:FBA1/YKL060C:GPM1/YKL152C
42274	ribosomal small subunit biogenesis	14 out of 128 genes, 10.9%	133 out of 7164 background genes, 1.9%	4.71e-05	0	0	BFR2/YDR299W:UTP6/YDR449C:SNU13/YEL026W:UTP8/YGR128C:NSR1/YGR159C:RRP3/YHR065C:SOF1/YLL011W:EMG1/YLR186W:UTP13/YLR222C:UTP21/YLR409C:TSR2/YLR435W:KRE33/YNL132W:NOP58/YOR310C:RRP12/YPL012W
6396	RNA processing	29 out of 128 genes, 22.7%	589 out of 7164 background genes, 8.2%	0.00019	0	0	MAK16/YAL025C:NOP1/YDL014W:SSB1/YDL229W:BFR2/YDR299W:UTP6/YDR449C:SNU13/YEL026W:NUG1/YER006W:DBP3/YGL078C:UTP8/YGR128C:NSR1/YGR159C:ZUO1/YGR285C:RRP3/YHR065C:GAR1/YHR089C:MRT4/YKL009W:TRZ1/YKR079C:SOF1/YLL011W:CBF5/YLR175W:EMG1/YLR186W:UTP13/YLR222C:GSP1/YLR293C:UTP21/YLR409C:TSR2/YLR435W:ERB1/YMR049C:NOP2/YNL061W:IPI3/YNL182C:SSB2/YNL209W:NOP58/YOR310C:RRP12/YPL012W:NIP7/YPL211W
6725	cellular aromatic compound metabolic process	59 out of 128 genes, 46.1%	1866 out of 7164 background genes, 26.0%	0.00037	0	0	MAK16/YAL025C:MIS1/YBR084W:PHO3/YBR092C:NOP1/YDL014W:PSA1/YDL055C:DUN1/YDL101C:DTD1/YDL219W:SSB1/YDL229W:HED1/YDR014W-A:HEM13/YDR044W:SWI5/YDR146C:BFR2/YDR299W:ECM11/YDR446W:UTP6/YDR449C:SNU13/YEL026W:NUG1/YER006W:MEI4/YER044C-A:DMC1/YER179W:HOP2/YGL033W:DBP3/YGL078C:DOC1/YGL240W:HXK2/YGL253W:UTP8/YGR128C:NSR1/YGR159C:ZUO1/YGR285C:RRP3/YHR065C:SAE3/YHR079C-A:GAR1/YHR089C:SPO16/YHR153C:SMC3/YJL074…
46483	heterocycle metabolic process	59 out of 128 genes, 46.1%	1886 out of 7164 background genes, 26.3%	0.00054	0	0	MAK16/YAL025C:MIS1/YBR084W:PHO3/YBR092C:NOP1/YDL014W:PSA1/YDL055C:DUN1/YDL101C:DTD1/YDL219W:SSB1/YDL229W:HED1/YDR014W-A:HEM13/YDR044W:SWI5/YDR146C:BFR2/YDR299W:ECM11/YDR446W:UTP6/YDR449C:SNU13/YEL026W:NUG1/YER006W:MEI4/YER044C-A:DMC1/YER179W:HOP2/YGL033W:DBP3/YGL078C:DOC1/YGL240W:HXK2/YGL253W:UTP8/YGR128C:NSR1/YGR159C:ZUO1/YGR285C:RRP3/YHR065C:SAE3/YHR079C-A:GAR1/YHR089C:SPO16/YHR153C:SMC3/YJL074…
42273	ribosomal large subunit biogenesis	11 out of 128 genes, 8.6%	98 out of 7164 background genes, 1.4%	0.00065	0	0	MAK16/YAL025C:RSA4/YCR072C:DBP3/YGL078C:CIC1/YHR052W:MRT4/YKL009W:RIX7/YLL034C:ERB1/YMR049C:NOP2/YNL061W:IPI3/YNL182C:BRX1/YOL077C:NIP7/YPL211W
34641	cellular nitrogen compound metabolic process	60 out of 128 genes, 46.9%	1953 out of 7164 background genes, 27.3%	0.00077	0	0	MAK16/YAL025C:MIS1/YBR084W:PHO3/YBR092C:NOP1/YDL014W:PSA1/YDL055C:DUN1/YDL101C:DTD1/YDL219W:SSB1/YDL229W:HED1/YDR014W-A:HEM13/YDR044W:SWI5/YDR146C:BFR2/YDR299W:ECM11/YDR446W:UTP6/YDR449C:SNU13/YEL026W:NUG1/YER006W:MEI4/YER044C-A:DMC1/YER179W:HOP2/YGL033W:DBP3/YGL078C:DOC1/YGL240W:HXK2/YGL253W:UTP8/YGR128C:NSR1/YGR159C:ZUO1/YGR285C:RRP3/YHR065C:SAE3/YHR079C-A:GAR1/YHR089C:EPT1/YHR123W:SPO16/YHR153…
7126	meiotic nuclear division	14 out of 128 genes, 10.9%	169 out of 7164 background genes, 2.4%	0.00091	0	0	ECM11/YDR446W:MEI4/YER044C-A:DMC1/YER179W:TUB2/YFL037W:HOP2/YGL033W:SPO13/YHR014W:SAE3/YHR079C-A:SPO16/YHR153C:SMC3/YJL074C:SCP160/YJL080C:CDC5/YMR001C:SLZ1/YNL196C:BFR1/YOR198C:MEI5/YPL121C
90304	nucleic acid metabolic process	52 out of 128 genes, 40.6%	1586 out of 7164 background genes, 22.1%	0.00092	0	0	MAK16/YAL025C:NOP1/YDL014W:DUN1/YDL101C:DTD1/YDL219W:SSB1/YDL229W:HED1/YDR014W-A:SWI5/YDR146C:BFR2/YDR299W:ECM11/YDR446W:UTP6/YDR449C:SNU13/YEL026W:NUG1/YER006W:MEI4/YER044C-A:DMC1/YER179W:HOP2/YGL033W:DBP3/YGL078C:DOC1/YGL240W:HXK2/YGL253W:UTP8/YGR128C:NSR1/YGR159C:ZUO1/YGR285C:RRP3/YHR065C:SAE3/YHR079C-A:GAR1/YHR089C:SPO16/YHR153C:SMC3/YJL074C:SCP160/YJL080C:RPA12/YJR063W:MRT4/YKL009W:TRZ1/YKR0…
6807	nitrogen compound metabolic process	63 out of 128 genes, 49.2%	2116 out of 7164 background genes, 29.5%	0.00103	0	0	MAK16/YAL025C:CHS2/YBR038W:MIS1/YBR084W:PHO3/YBR092C:NOP1/YDL014W:PSA1/YDL055C:DUN1/YDL101C:DTD1/YDL219W:SSB1/YDL229W:HED1/YDR014W-A:HEM13/YDR044W:SWI5/YDR146C:BFR2/YDR299W:ECM11/YDR446W:UTP6/YDR449C:SNU13/YEL026W:NUG1/YER006W:MEI4/YER044C-A:SER3/YER081W:DMC1/YER179W:HOP2/YGL033W:DBP3/YGL078C:DOC1/YGL240W:HXK2/YGL253W:UTP8/YGR128C:NSR1/YGR159C:CRH1/YGR189C:ZUO1/YGR285C:RRP3/YHR065C:SAE3/YHR079C-A…
462	maturation of SSU-rRNA from tricistronic rRNA transcript (SSU-rRNA, 5.8S rRNA, LSU-rRNA)	11 out of 128 genes, 8.6%	103 out of 7164 background genes, 1.4%	0.00107	0	0	BFR2/YDR299W:UTP6/YDR449C:SNU13/YEL026W:UTP8/YGR128C:RRP3/YHR065C:SOF1/YLL011W:EMG1/YLR186W:UTP13/YLR222C:TSR2/YLR435W:NOP58/YOR310C:RRP12/YPL012W
1901360	organic cyclic compound metabolic process	59 out of 128 genes, 46.1%	1940 out of 7164 background genes, 27.1%	0.00147	0	0	MAK16/YAL025C:MIS1/YBR084W:PHO3/YBR092C:NOP1/YDL014W:PSA1/YDL055C:DUN1/YDL101C:DTD1/YDL219W:SSB1/YDL229W:HED1/YDR014W-A:HEM13/YDR044W:SWI5/YDR146C:BFR2/YDR299W:ECM11/YDR446W:UTP6/YDR449C:SNU13/YEL026W:NUG1/YER006W:MEI4/YER044C-A:DMC1/YER179W:HOP2/YGL033W:DBP3/YGL078C:DOC1/YGL240W:HXK2/YGL253W:UTP8/YGR128C:NSR1/YGR159C:ZUO1/YGR285C:RRP3/YHR065C:SAE3/YHR079C-A:GAR1/YHR089C:SPO16/YHR153C:SMC3/YJL074…
35825	reciprocal DNA recombination	8 out of 128 genes, 6.2%	54 out of 7164 background genes, 0.8%	0.00246	0	0	ECM11/YDR446W:DMC1/YER179W:HOP2/YGL033W:SAE3/YHR079C-A:SPO16/YHR153C:SMC3/YJL074C:CDC5/YMR001C:MEI5/YPL121C
7131	reciprocal meiotic recombination	8 out of 128 genes, 6.2%	54 out of 7164 background genes, 0.8%	0.00246	0	0	ECM11/YDR446W:DMC1/YER179W:HOP2/YGL033W:SAE3/YHR079C-A:SPO16/YHR153C:SMC3/YJL074C:CDC5/YMR001C:MEI5/YPL121C
30490	maturation of SSU-rRNA	11 out of 128 genes, 8.6%	112 out of 7164 background genes, 1.6%	0.00247	0	0	BFR2/YDR299W:UTP6/YDR449C:SNU13/YEL026W:UTP8/YGR128C:RRP3/YHR065C:SOF1/YLL011W:EMG1/YLR186W:UTP13/YLR222C:TSR2/YLR435W:NOP58/YOR310C:RRP12/YPL012W
6139	nucleobase-containing compound metabolic process	55 out of 128 genes, 43.0%	1795 out of 7164 background genes, 25.1%	0.00342	0	0	MAK16/YAL025C:MIS1/YBR084W:NOP1/YDL014W:PSA1/YDL055C:DUN1/YDL101C:DTD1/YDL219W:SSB1/YDL229W:HED1/YDR014W-A:SWI5/YDR146C:BFR2/YDR299W:ECM11/YDR446W:UTP6/YDR449C:SNU13/YEL026W:NUG1/YER006W:MEI4/YER044C-A:DMC1/YER179W:HOP2/YGL033W:DBP3/YGL078C:DOC1/YGL240W:HXK2/YGL253W:UTP8/YGR128C:NSR1/YGR159C:ZUO1/YGR285C:RRP3/YHR065C:SAE3/YHR079C-A:GAR1/YHR089C:SPO16/YHR153C:SMC3/YJL074C:SCP160/YJL080C:RPA12/YJR0…
7127	meiosis I	10 out of 128 genes, 7.8%	96 out of 7164 background genes, 1.3%	0.00404	0	0	ECM11/YDR446W:MEI4/YER044C-A:DMC1/YER179W:TUB2/YFL037W:HOP2/YGL033W:SAE3/YHR079C-A:SPO16/YHR153C:SMC3/YJL074C:CDC5/YMR001C:MEI5/YPL121C
7049	cell cycle	28 out of 128 genes, 21.9%	648 out of 7164 background genes, 9.0%	0.00421	0	0	CHS2/YBR038W:DUN1/YDL101C:SWI5/YDR146C:ECM11/YDR446W:GIN4/YDR507C:MEI4/YER044C-A:DMC1/YER179W:TUB2/YFL037W:SCW11/YGL028C:HOP2/YGL033W:DOC1/YGL240W:SPO13/YHR014W:SAE3/YHR079C-A:SPO16/YHR153C:SMC3/YJL074C:SCP160/YJL080C:FAR1/YJL157C:SPH1/YLR313C:HUG1/YML058W-A:CDC5/YMR001C:HOF1/YMR032W:IPI3/YNL182C:SLZ1/YNL196C:BFR1/YOR198C:SFG1/YOR315W:MEI5/YPL121C:CLN2/YPL256C:CLB2/YPR119W
71704	organic substance metabolic process	90 out of 128 genes, 70.3%	3731 out of 7164 background genes, 52.1%	0.00981	0	0	MAK16/YAL025C:CDC19/YAL038W:KIN3/YAR018C:CHS2/YBR038W:MIS1/YBR084W:PHO3/YBR092C:NOP1/YDL014W:PSA1/YDL055C:DUN1/YDL101C:DTD1/YDL219W:SSB1/YDL229W:HED1/YDR014W-A:HEM13/YDR044W:TPI1/YDR050C:SWI5/YDR146C:BFR2/YDR299W:PHO92/YDR374C:ECM11/YDR446W:UTP6/YDR449C:GIN4/YDR507C:SNU13/YEL026W:NUG1/YER006W:MEI4/YER044C-A:SER3/YER081W:DMC1/YER179W:AAD6/YFL056C:HOP2/YGL033W:DBP3/YGL078C:DOC1/YGL240W:HXK2/YGL253W…

## Sheet: Panel E
Supplementary File 4 - Panel E: GO term Analysis for downregulated genes in DNMT3b-expressing strain vs. EV
GOID	GO_term	Cluster frequency	Background frequency	P-value	FDR	Expected FP	Gene(s) annotated to the term
9082	branched-chain amino acid biosynthetic process	10 out of 159 genes, 6.3%	13 out of 7164 background genes, 0.2%	2.89e-12	0	0	ILV6/YCL009C:LEU2/YCL018W:LEU1/YGL009C:BAT1/YHR208W:MMF1/YIL051C:ILV3/YJR016C:ILV5/YLR355C:ILV2/YMR108W:LEU4/YNL104C:LEU9/YOR108W
8652	cellular amino acid biosynthetic process	22 out of 159 genes, 13.8%	128 out of 7164 background genes, 1.8%	1.9e-11	0	0	ILV6/YCL009C:LEU2/YCL018W:HOM2/YDR158W:HOM3/YER052C:LEU1/YGL009C:TRP5/YGL026C:MET13/YGL125W:LYS5/YGL154C:PAN5/YHR063C:BAT1/YHR208W:MMF1/YIL051C:SER33/YIL074C:ILV3/YJR016C:AAT1/YKL106W:ALT1/YLR089C:ILV5/YLR355C:ARG7/YMR062C:ILV2/YMR108W:LEU4/YNL104C:LEU9/YOR108W:HIS3/YOR202W:CPA1/YOR303W
9081	branched-chain amino acid metabolic process	10 out of 159 genes, 6.3%	17 out of 7164 background genes, 0.2%	1.82e-10	0	0	ILV6/YCL009C:LEU2/YCL018W:LEU1/YGL009C:BAT1/YHR208W:MMF1/YIL051C:ILV3/YJR016C:ILV5/YLR355C:ILV2/YMR108W:LEU4/YNL104C:LEU9/YOR108W
16053	organic acid biosynthetic process	23 out of 159 genes, 14.5%	169 out of 7164 background genes, 2.4%	8.22e-10	0	0	ILV6/YCL009C:LEU2/YCL018W:HOM2/YDR158W:HOM3/YER052C:ALD5/YER073W:LEU1/YGL009C:TRP5/YGL026C:MET13/YGL125W:LYS5/YGL154C:PAN5/YHR063C:BAT1/YHR208W:MMF1/YIL051C:SER33/YIL074C:ILV3/YJR016C:AAT1/YKL106W:ALT1/YLR089C:ILV5/YLR355C:ARG7/YMR062C:ILV2/YMR108W:LEU4/YNL104C:LEU9/YOR108W:HIS3/YOR202W:CPA1/YOR303W
46394	carboxylic acid biosynthetic process	23 out of 159 genes, 14.5%	169 out of 7164 background genes, 2.4%	8.22e-10	0	0	ILV6/YCL009C:LEU2/YCL018W:HOM2/YDR158W:HOM3/YER052C:ALD5/YER073W:LEU1/YGL009C:TRP5/YGL026C:MET13/YGL125W:LYS5/YGL154C:PAN5/YHR063C:BAT1/YHR208W:MMF1/YIL051C:SER33/YIL074C:ILV3/YJR016C:AAT1/YKL106W:ALT1/YLR089C:ILV5/YLR355C:ARG7/YMR062C:ILV2/YMR108W:LEU4/YNL104C:LEU9/YOR108W:HIS3/YOR202W:CPA1/YOR303W
6520	cellular amino acid metabolic process	27 out of 159 genes, 17.0%	254 out of 7164 background genes, 3.5%	3.3e-09	0	0	ILV6/YCL009C:LEU2/YCL018W:HOM2/YDR158W:HOM3/YER052C:LEU1/YGL009C:TRP5/YGL026C:MET13/YGL125W:LYS5/YGL154C:GTO1/YGR154C:PAN5/YHR063C:BAT1/YHR208W:MMF1/YIL051C:SER33/YIL074C:ILV3/YJR016C:MAE1/YKL029C:AAT1/YKL106W:ALT1/YLR089C:ILV5/YLR355C:CAR2/YLR438W:ARG7/YMR062C:ILV2/YMR108W:LEU4/YNL104C:DUG3/YNL191W:LEU9/YOR108W:HIS3/YOR202W:CPA1/YOR303W:CDC60/YPL160W
1901607	alpha-amino acid biosynthetic process	16 out of 159 genes, 10.1%	100 out of 7164 background genes, 1.4%	2.15e-07	0	0	LEU2/YCL018W:HOM2/YDR158W:HOM3/YER052C:LEU1/YGL009C:TRP5/YGL026C:MET13/YGL125W:LYS5/YGL154C:MMF1/YIL051C:SER33/YIL074C:AAT1/YKL106W:ALT1/YLR089C:ARG7/YMR062C:LEU4/YNL104C:LEU9/YOR108W:HIS3/YOR202W:CPA1/YOR303W
19752	carboxylic acid metabolic process	30 out of 159 genes, 18.9%	388 out of 7164 background genes, 5.4%	5.94e-07	0	0	ILV6/YCL009C:LEU2/YCL018W:NDE2/YDL085W:HOM2/YDR158W:HOM3/YER052C:ALD5/YER073W:LEU1/YGL009C:TRP5/YGL026C:MET13/YGL125W:LYS5/YGL154C:GTO1/YGR154C:PAN5/YHR063C:BAT1/YHR208W:MMF1/YIL051C:SER33/YIL074C:ILV3/YJR016C:MAE1/YKL029C:AAT1/YKL106W:ALT1/YLR089C:ILV5/YLR355C:CAR2/YLR438W:ARG7/YMR062C:ILV2/YMR108W:LEU4/YNL104C:MLS1/YNL117W:DUG3/YNL191W:LEU9/YOR108W:HIS3/YOR202W:CPA1/YOR303W:CDC60/YPL160W
43436	oxoacid metabolic process	30 out of 159 genes, 18.9%	401 out of 7164 background genes, 5.6%	1.3e-06	0	0	ILV6/YCL009C:LEU2/YCL018W:NDE2/YDL085W:HOM2/YDR158W:HOM3/YER052C:ALD5/YER073W:LEU1/YGL009C:TRP5/YGL026C:MET13/YGL125W:LYS5/YGL154C:GTO1/YGR154C:PAN5/YHR063C:BAT1/YHR208W:MMF1/YIL051C:SER33/YIL074C:ILV3/YJR016C:MAE1/YKL029C:AAT1/YKL106W:ALT1/YLR089C:ILV5/YLR355C:CAR2/YLR438W:ARG7/YMR062C:ILV2/YMR108W:LEU4/YNL104C:MLS1/YNL117W:DUG3/YNL191W:LEU9/YOR108W:HIS3/YOR202W:CPA1/YOR303W:CDC60/YPL160W
6082	organic acid metabolic process	30 out of 159 genes, 18.9%	402 out of 7164 background genes, 5.6%	1.38e-06	0	0	ILV6/YCL009C:LEU2/YCL018W:NDE2/YDL085W:HOM2/YDR158W:HOM3/YER052C:ALD5/YER073W:LEU1/YGL009C:TRP5/YGL026C:MET13/YGL125W:LYS5/YGL154C:GTO1/YGR154C:PAN5/YHR063C:BAT1/YHR208W:MMF1/YIL051C:SER33/YIL074C:ILV3/YJR016C:MAE1/YKL029C:AAT1/YKL106W:ALT1/YLR089C:ILV5/YLR355C:CAR2/YLR438W:ARG7/YMR062C:ILV2/YMR108W:LEU4/YNL104C:MLS1/YNL117W:DUG3/YNL191W:LEU9/YOR108W:HIS3/YOR202W:CPA1/YOR303W:CDC60/YPL160W
1901566	organonitrogen compound biosynthetic process	27 out of 159 genes, 17.0%	338 out of 7164 background genes, 4.7%	2.24e-06	0	0	RIB5/YBR256C:ILV6/YCL009C:LEU2/YCL018W:HOM2/YDR158W:URA3/YEL021W:HOM3/YER052C:LEU1/YGL009C:TRP5/YGL026C:MET13/YGL125W:LYS5/YGL154C:PAN5/YHR063C:BAT1/YHR208W:MMF1/YIL051C:SER33/YIL074C:ILV3/YJR016C:BNA1/YJR025C:AAT1/YKL106W:ALT1/YLR089C:ILV5/YLR355C:ARG7/YMR062C:ILV2/YMR108W:URA10/YMR271C:LEU4/YNL104C:LEU9/YOR108W:HIS3/YOR202W:CPA1/YOR303W:POS5/YPL188W
1901605	alpha-amino acid metabolic process	17 out of 159 genes, 10.7%	134 out of 7164 background genes, 1.9%	2.41e-06	0	0	LEU2/YCL018W:HOM2/YDR158W:HOM3/YER052C:LEU1/YGL009C:TRP5/YGL026C:MET13/YGL125W:LYS5/YGL154C:MMF1/YIL051C:SER33/YIL074C:AAT1/YKL106W:ALT1/YLR089C:CAR2/YLR438W:ARG7/YMR062C:LEU4/YNL104C:LEU9/YOR108W:HIS3/YOR202W:CPA1/YOR303W
44283	small molecule biosynthetic process	24 out of 159 genes, 15.1%	278 out of 7164 background genes, 3.9%	3.95e-06	0	0	RIB5/YBR256C:ILV6/YCL009C:LEU2/YCL018W:HOM2/YDR158W:HOM3/YER052C:ALD5/YER073W:LEU1/YGL009C:TRP5/YGL026C:MET13/YGL125W:LYS5/YGL154C:PAN5/YHR063C:BAT1/YHR208W:MMF1/YIL051C:SER33/YIL074C:ILV3/YJR016C:AAT1/YKL106W:ALT1/YLR089C:ILV5/YLR355C:ARG7/YMR062C:ILV2/YMR108W:LEU4/YNL104C:LEU9/YOR108W:HIS3/YOR202W:CPA1/YOR303W
1901564	organonitrogen compound metabolic process	36 out of 159 genes, 22.6%	605 out of 7164 background genes, 8.4%	1.27e-05	0	0	RIB5/YBR256C:ILV6/YCL009C:LEU2/YCL018W:NDE2/YDL085W:HOM2/YDR158W:URA3/YEL021W:CYC7/YEL039C:HOM3/YER052C:LEU1/YGL009C:TRP5/YGL026C:MET13/YGL125W:LYS5/YGL154C:GTO1/YGR154C:PAN5/YHR063C:BAT1/YHR208W:MMF1/YIL051C:SER33/YIL074C:ILV3/YJR016C:BNA1/YJR025C:MAE1/YKL029C:AAT1/YKL106W:ALT1/YLR089C:SHH4/YLR164W:ILV5/YLR355C:CAR2/YLR438W:ARG7/YMR062C:ILV2/YMR108W:URA10/YMR271C:LEU4/YNL104C:DUG3/YNL191W:ZWF1/Y…
44281	small molecule metabolic process	40 out of 159 genes, 25.2%	751 out of 7164 background genes, 10.5%	3.95e-05	0	0	VID24/YBR105C:RIB5/YBR256C:ILV6/YCL009C:LEU2/YCL018W:NDE2/YDL085W:HOM2/YDR158W:URA3/YEL021W:CYC7/YEL039C:HOM3/YER052C:ALD5/YER073W:LEU1/YGL009C:TRP5/YGL026C:MET13/YGL125W:LYS5/YGL154C:GTO1/YGR154C:PAN5/YHR063C:BAT1/YHR208W:MMF1/YIL051C:SER33/YIL074C:SIP4/YJL089W:ILV3/YJR016C:BNA1/YJR025C:MAE1/YKL029C:AAT1/YKL106W:ALT1/YLR089C:SHH4/YLR164W:ILV5/YLR355C:CAR2/YLR438W:ARG7/YMR062C:ILV2/YMR108W:URA10/…
9098	leucine biosynthetic process	4 out of 159 genes, 2.5%	5 out of 7164 background genes, 0.1%	0.00056	0	0	LEU2/YCL018W:LEU1/YGL009C:LEU4/YNL104C:LEU9/YOR108W
6551	leucine metabolic process	4 out of 159 genes, 2.5%	8 out of 7164 background genes, 0.1%	0.00749	0	0	LEU2/YCL018W:LEU1/YGL009C:LEU4/YNL104C:LEU9/YOR108W

## Sheet: Panel F
Supplementary File 4 - Panel F: RPKM values of yeast verified ORF in DNMT3b-expressing strain
gene_id	RPKM
YAL001C	17.1648
YAL002W	16.5847
YAL003W	499.153
YAL005C	893.147
YAL007C	60.0126
YAL008W	192.568
YAL009W	42.6897
YAL010C	20.5549
YAL011W	19.5424
YAL013W	83.3451
YAL014C	95.4692
YAL015C	46.5173
YAL016W	147.076
YAL017W	40.2
YAL018C	29.408
YAL019W	9.56649
YAL020C	42.0371
YAL021C	48.984
YAL022C	30.238
YAL023C	74.9407
YAL024C	3.62959
YAL025C	41.2562
YAL026C	12.8824
YAL027W	49.3752
YAL028W	33.0807
YAL029C	12.2002
YAL030W	153.013
YAL031C	37.8658
YAL032C	56.4276
YAL033W	32.2826
YAL034C	283.299
YAL034W-A	17.2909
YAL035W	62.1157
YAL036C	32.1148
YAL038W	5731.35
YAL039C	310.065
YAL040C	40.2064
YAL041W	15.1927
YAL042W	149.733
YAL043C	31.8502
YAL044C	326.595
YAL046C	70.3509
YAL047C	11.3571
YAL048C	16.3125
YAL049C	151.647
YAL051W	17.9093
YAL053W	200.855
YAL054C	441.509
YAL055W	102.651
YAL056W	56.3716
YAL058W	14.2043
YAL059W	42.8081
YAL060W	670.629
YAL062W	676.498
YAL063C	9.04271
YAL064W	1.70562
YAL067C	12.048
YAL068C	2.00869
YAR002C-A	189.653
YAR002W	27.3557
YAR003W	22.8315
YAR007C	53.9245
YAR008W	24.3638
YAR014C	30.7712
YAR015W	365.5
YAR018C	21.2453
YAR019C	22.0929
YAR020C	47.2599
YAR027W	229.09
YAR031W	13.7333
YAR033W	8.50391
YAR035W	300.713
YAR042W	29.8675
YAR050W	3.6347
YAR071W	0.865566
YBL001C	750.243
YBL002W	398.947
YBL003C	680.421
YBL004W	8.44604
YBL005W	27.0333
YBL006C	139.151
YBL007C	84.878
YBL008W	8.1884
YBL009W	9.85288
YBL011W	68.6831
YBL013W	4.36659
YBL014C	7.42279
YBL015W	1020.63
YBL016W	278.372
YBL017C	77.5302
YBL018C	34.3091
YBL019W	30.5822
YBL020W	30.3403
YBL021C	39.2979
YBL022C	27.8154
YBL023C	16.7193
YBL024W	29.4105
YBL025W	36.2542
YBL026W	138.858
YBL027W	573.318
YBL028C	50.9827
YBL029C-A	265.508
YBL030C	407.794
YBL031W	8.84256
YBL032W	64.4036
YBL033C	232.592
YBL034C	10.6845
YBL035C	15.4154
YBL036C	60.7104
YBL037W	18.8197
YBL038W	108.602
YBL039C	21.8198
YBL040C	114.622
YBL041W	279.207
YBL042C	20.8028
YBL043W	217.511
YBL045C	497.01
YBL046W	43.319
YBL047C	87.5632
YBL049W	624.627
YBL050W	216.262
YBL051C	51.8719
YBL052C	11.0767
YBL054W	41.0219
YBL055C	56.4605
YBL056W	200.441
YBL057C	73.0057
YBL058W	198.466
YBL059C-A	90.3876
YBL060W	13.6598
YBL061C	26.597
YBL063W	5.02713
YBL064C	606.597
YBL066C	17.7578
YBL067C	45.3825
YBL068W	45.3398
YBL069W	53.7624
YBL071W-A	82.009
YBL072C	316.007
YBL074C	8.24199
YBL075C	213.179
YBL076C	73.0893
YBL078C	493.883
YBL079W	11.1401
YBL080C	19.1332
YBL082C	24.8212
YBL084C	35.8652
YBL085W	23.0415
YBL087C	182.509
YBL088C	5.13379
YBL089W	31.1152
YBL090W	102.106
YBL091C	149.619
YBL091C-A	69.4431
YBL092W	1617.87
YBL093C	132.584
YBL097W	1.75269
YBL098W	81.5442
YBL099W	641.886
YBL101C	40.122
YBL102W	232.799
YBL103C	47.5788
YBL104C	7.25176
YBL105C	32.8663
YBL106C	11.1388
YBL107C	89.9275
YBL108C-A	0
YBL111C	0.154098
YBR001C	61.3765
YBR002C	25.5001
YBR003W	65.691
YBR004C	60.6694
YBR005W	183.108
YBR006W	130.907
YBR007C	15.9396
YBR008C	43.2878
YBR009C	1016.61
YBR010W	1504.63
YBR011C	615.035
YBR014C	70.8237
YBR015C	68.7786
YBR016W	503.268
YBR017C	17.514
YBR018C	871.834
YBR019C	3342.26
YBR020W	3218.37
YBR021W	21.596
YBR022W	50.977
YBR023C	29.7155
YBR024W	79.8545
YBR025C	287.217
YBR026C	314.57
YBR028C	27.9298
YBR029C	74.0002
YBR030W	13.5272
YBR031W	156.826
YBR034C	54.1661
YBR035C	323.714
YBR036C	357.447
YBR037C	79.2835
YBR038W	24.3163
YBR039W	399.805
YBR040W	8.39975
YBR041W	53.8904
YBR042C	21.8488
YBR043C	33.7766
YBR044C	22.3398
YBR045C	16.4988
YBR046C	140.994
YBR048W	192.56
YBR049C	30.4355
YBR050C	101.548
YBR052C	409.565
YBR054W	2274.11
YBR055C	12.0025
YBR056W	185.382
YBR057C	90.583
YBR058C	28.0417
YBR058C-A	230.382
YBR059C	43.9542
YBR060C	12.4809
YBR061C	25.8768
YBR065C	17.9791
YBR066C	121.22
YBR067C	3585.74
YBR068C	585.669
YBR069C	51.7463
YBR070C	38.3526
YBR071W	373.111
YBR072W	5340.84
YBR073W	22.2184
YBR074W	15.8109
YBR076W	37.7319
YBR077C	95.0997
YBR078W	1011.26
YBR079C	85.1868
YBR080C	40.2772
YBR081C	9.44084
YBR082C	390.586
YBR083W	185.102
YBR084C-A	416.831
YBR084W	22.1081
YBR085C-A	2113.98
YBR085W	1.75361
YBR086C	119.201
YBR087W	24.191
YBR088C	97.8081
YBR089C-A	1056.62
YBR091C	30.9338
YBR092C	129.662
YBR093C	39.1236
YBR094W	21.275
YBR095C	52.6328
YBR097W	4.9
YBR098W	10.0074
YBR101C	112.384
YBR102C	16.5831
YBR103W	43.0781
YBR104W	31.6703
YBR105C	102.294
YBR106W	485.245
YBR107C	37.3249
YBR108W	34.6402
YBR109C	490.664
YBR110W	44.5293
YBR111C	365.275
YBR111W-A	125.843
YBR112C	55.5039
YBR114W	26.357
YBR115C	59.4978
YBR117C	144.94
YBR118W	640.134
YBR119W	91.8631
YBR120C	97.2535
YBR121C	122.821
YBR122C	100.589
YBR123C	25.3838
YBR125C	59.152
YBR126C	981.787
YBR127C	414.782
YBR128C	28.4929
YBR129C	47.7729
YBR130C	18.7645
YBR131W	4.84102
YBR132C	106.213
YBR133C	17.9041
YBR135W	98.0073
YBR136W	5.62
YBR137W	136.979
YBR139W	234.084
YBR140C	10.2417
YBR141C	13.7676
YBR142W	13.3633
YBR143C	154.82
YBR145W	339.182
YBR146W	127.866
YBR147W	373.078
YBR148W	8.98713
YBR149W	544.575
YBR150C	13.4658
YBR151W	261.282
YBR152W	14.0577
YBR153W	31.0841
YBR154C	98.8957
YBR155W	14.2724
YBR156C	8.96325
YBR157C	174.798
YBR158W	57.5957
YBR159W	116.404
YBR160W	102.332
YBR161W	37.1776
YBR162C	527.143
YBR162W-A	304.427
YBR163W	18.8487
YBR164C	57.5338
YBR165W	46.1428
YBR166C	31.3576
YBR167C	72.0151
YBR168W	32.2894
YBR169C	241.456
YBR170C	40.1134
YBR171W	72.7979
YBR172C	31.1968
YBR173C	235.076
YBR175W	10.0263
YBR176W	30.5431
YBR177C	186.711
YBR179C	31.0439
YBR180W	5.27859
YBR181C	100.528
YBR182C	68.0209
YBR183W	158.2
YBR185C	52.8498
YBR186W	16.8039
YBR187W	59.5854
YBR188C	48.457
YBR189W	379.995
YBR191W	354.766
YBR192W	19.1469
YBR193C	61.8478
YBR194W	33.1037
YBR195C	22.3451
YBR196C	1630.7
YBR197C	80.1498
YBR198C	24.6397
YBR199W	138.861
YBR200W	31.5066
YBR201W	58.9793
YBR202W	40.0616
YBR203W	49.2817
YBR204C	78.0722
YBR205W	43.4463
YBR207W	99.2719
YBR208C	27.4616
YBR210W	50.9897
YBR211C	32.6561
YBR212W	110.791
YBR213W	9.62384
YBR214W	554.332
YBR215W	27.7489
YBR216C	23.5249
YBR217W	31.0493
YBR218C	137.201
YBR221C	498.17
YBR222C	299.644
YBR223C	22.5181
YBR227C	28.4052
YBR228W	48.9644
YBR229C	14.3936
YBR230C	1378.26
YBR231C	62.7171
YBR233W	21.5296
YBR233W-A	53.7271
YBR234C	170.521
YBR235W	20.1157
YBR236C	28.4888
YBR237W	22.4941
YBR238C	12.2485
YBR240C	56.4065
YBR243C	28.2086
YBR244W	19.3844
YBR245C	12.1406
YBR246W	30.3466
YBR247C	20.1985
YBR248C	35.0634
YBR249C	442.281
YBR250W	8.09139
YBR251W	72.8627
YBR252W	44.8878
YBR253W	97.3975
YBR254C	20.4077
YBR255W	26.7725
YBR256C	375.706
YBR257W	33.3713
YBR258C	35.5039
YBR259W	8.77978
YBR260C	22.7544
YBR261C	31.2941
YBR262C	272.581
YBR263W	140.968
YBR264C	56.0368
YBR265W	94.5619
YBR267W	51.5664
YBR268W	107.513
YBR271W	14.5316
YBR272C	28.1847
YBR273C	102.523
YBR274W	28.9493
YBR275C	5.31097
YBR276C	29.9469
YBR278W	75.0051
YBR279W	84.5289
YBR280C	61.4612
YBR281C	8.63321
YBR282W	89.1003
YBR283C	131.453
YBR286W	640.857
YBR288C	23.4347
YBR289W	18.6595
YBR290W	160.692
YBR291C	84.0776
YBR293W	39.9115
YBR294W	25.1529
YBR295W	23.0336
YBR296C	11.3189
YBR297W	60.5756
YBR298C	169.675
YBR299W	2.30818
YBR301W	5.03211
YCL001W	115.596
YCL004W	25.6088
YCL005W	49.9132
YCL005W-A	282.765
YCL008C	43.237
YCL009C	644.651
YCL010C	60.6589
YCL011C	136.48
YCL012C	168.557
YCL014W	9.83224
YCL016C	22.7528
YCL017C	90.0731
YCL018W	251.856
YCL024W	6.54583
YCL025C	519.667
YCL026C-A	21.8551
YCL026C-B	31.5994
YCL027W	34.4283
YCL028W	137.423
YCL029C	23.1477
YCL030C	498.727
YCL031C	63.9799
YCL032W	75.1022
YCL033C	177.854
YCL034W	177.781
YCL035C	1016.48
YCL036W	11.812
YCL037C	2.79369
YCL038C	69.888
YCL039W	58.4278
YCL040W	2876.89
YCL043C	630.564
YCL044C	45.1602
YCL045C	42.3763
YCL047C	38.1624
YCL048W	13.2118
YCL050C	97.2875
YCL051W	50.9593
YCL052C	130.689
YCL054W	13.4708
YCL055W	70.9702
YCL056C	103.925
YCL057C-A	461.301
YCL057W	31.8538
YCL058C	61.6283
YCL058W-A	0
YCL059C	60.3155
YCL061C	6.00673
YCL063W	13.7576
YCL064C	25.5843
YCL069W	0.117672
YCL073C	0.394563
YCR002C	82.7728
YCR003W	58.2677
YCR004C	591.729
YCR005C	2379.66
YCR008W	65.681
YCR009C	278.585
YCR010C	688.549
YCR011C	52.1852
YCR012W	7322.53
YCR014C	18.8067
YCR017C	60.7486
YCR018C	162.034
YCR019W	22.9251
YCR020C	181.288
YCR020C-A	89.2097
YCR020W-B	39.6539
YCR021C	3482.35
YCR023C	60.4097
YCR024C	18.8437
YCR024C-A	2033.33
YCR026C	35.2927
YCR027C	31.7638
YCR028C	29.8484
YCR028C-A	211.205
YCR030C	64.9562
YCR031C	673.868
YCR032W	7.56109
YCR033W	21.6133
YCR034W	89.0876
YCR035C	39.859
YCR036W	109.64
YCR037C	31.7404
YCR038C	10.7182
YCR042C	11.4485
YCR044C	51.1448
YCR045C	21.5325
YCR046C	180.303
YCR047C	90.4103
YCR048W	46.8004
YCR052W	46.8693
YCR053W	133.717
YCR054C	10.7735
YCR057C	14.818
YCR059C	98.0128
YCR060W	138.645
YCR063W	15.0136
YCR065W	16.9682
YCR066W	12.9494
YCR067C	16.6442
YCR068W	44.733
YCR069W	236.278
YCR071C	81.9355
YCR072C	8.79254
YCR073C	12.7121
YCR073W-A	128.448
YCR075C	32.8
YCR076C	113.725
YCR077C	85.0153
YCR079W	116.252
YCR081W	4.88464
YCR082W	325.952
YCR083W	377.657
YCR084C	95.9571
YCR086W	37.61
YCR088W	139.446
YCR089W	11.5235
YCR091W	80.6799
YCR092C	8.10965
YCR093W	19.4507
YCR094W	32.9993
YCR097W	191.147
YCR098C	52.2942
YCR104W	2.16045
YCR105W	23.947
YCR106W	7.48897
YCR107W	17.3608
YDL001W	30.0759
YDL002C	88.6951
YDL003W	10.0974
YDL004W	492.644
YDL005C	74.078
YDL006W	48.7443
YDL007W	174.304
YDL008W	60.1933
YDL010W	206.828
YDL012C	232.578
YDL013W	44.5158
YDL014W	225.102
YDL015C	160.124
YDL017W	18.275
YDL018C	60.5835
YDL019C	47.1758
YDL020C	244.878
YDL021W	127.152
YDL022W	748.019
YDL024C	34.568
YDL025C	90.8791
YDL028C	22.4165
YDL029W	218.727
YDL030W	23.1913
YDL031W	17.4073
YDL033C	18.8594
YDL035C	37.1418
YDL036C	17.1483
YDL037C	7.30548
YDL039C	8.53827
YDL040C	28.7745
YDL042C	25.7809
YDL043C	28.8263
YDL044C	17.3914
YDL045C	65.7988
YDL045W-A	132.215
YDL046W	743.897
YDL047W	151.82
YDL048C	145.479
YDL049C	63.4482
YDL051W	86.1011
YDL052C	98.162
YDL053C	135.609
YDL054C	108.466
YDL055C	1304.1
YDL056W	20.6266
YDL058W	6.30283
YDL059C	13.1074
YDL060W	18.2091
YDL061C	1137.55
YDL063C	8.68952
YDL064W	82.543
YDL065C	69.6006
YDL066W	249.975
YDL067C	1076.63
YDL069C	17.315
YDL070W	142.505
YDL072C	594.125
YDL074C	23.3073
YDL075W	472.617
YDL076C	56.3915
YDL077C	7.79306
YDL078C	358.296
YDL079C	281.261
YDL080C	26.1645
YDL081C	1287.69
YDL082W	250.103
YDL083C	349.855
YDL084W	162.94
YDL085W	168.81
YDL087C	24.6349
YDL088C	65.1403
YDL089W	29.6227
YDL090C	19.1915
YDL091C	64.4346
YDL092W	121.434
YDL093W	22.861
YDL095W	71.6489
YDL097C	175.754
YDL098C	40.5777
YDL099W	121.368
YDL100C	153.97
YDL101C	26.848
YDL102W	8.33781
YDL103C	32.0339
YDL104C	15.5547
YDL105W	13.0673
YDL106C	45.8132
YDL107W	35.0613
YDL108W	30.0782
YDL110C	840.931
YDL111C	42.539
YDL112W	9.17103
YDL113C	52.0733
YDL115C	115.955
YDL116W	21.9166
YDL117W	17.5872
YDL120W	127.467
YDL122W	38.9415
YDL123W	272.163
YDL124W	1512.66
YDL125C	1312.67
YDL126C	330.755
YDL127W	37.9303
YDL128W	177.503
YDL129W	35.6068
YDL130W	377.862
YDL130W-A	1187.32
YDL131W	472.936
YDL132W	40.4423
YDL133C-A	1218.37
YDL133W	72.2617
YDL134C	214.367
YDL135C	110.683
YDL136W	81.3335
YDL137W	741.765
YDL138W	28.4196
YDL139C	33.6365
YDL140C	55.413
YDL141W	31.6173
YDL142C	54.0113
YDL143W	82.7017
YDL144C	92.2126
YDL145C	58.1902
YDL146W	30.6833
YDL147W	143.929
YDL148C	12.6204
YDL149W	15.0182
YDL150W	36.1846
YDL153C	41.1028
YDL154W	11.0777
YDL155W	51.866
YDL156W	5.78324
YDL159W	40.8438
YDL160C	37.2859
YDL160C-A	35.3407
YDL161W	96.947
YDL164C	18.7215
YDL165W	86.7838
YDL166C	70.242
YDL167C	8.13921
YDL168W	84.0176
YDL169C	137.681
YDL170W	53.0924
YDL171C	66.2809
YDL173W	300.698
YDL174C	314.331
YDL175C	47.9057
YDL176W	17.3309
YDL178W	72.778
YDL179W	67.1157
YDL181W	359.866
YDL182W	415.094
YDL183C	60.6576
YDL184C	744.733
YDL185W	214.246
YDL188C	62.0844
YDL189W	25.3547
YDL190C	25.3775
YDL191W	126.459
YDL192W	402.414
YDL193W	76.5639
YDL194W	47.4201
YDL195W	62.9355
YDL197C	57.2458
YDL198C	169.75
YDL200C	105.451
YDL201W	55.8933
YDL202W	51.2027
YDL203C	26.6162
YDL204W	611.671
YDL205C	38.6971
YDL207W	39.7319
YDL208W	175.623
YDL209C	15.3297
YDL210W	113.216
YDL212W	235.628
YDL213C	83.1679
YDL214C	105.013
YDL215C	243.471
YDL216C	24.1275
YDL217C	52.1936
YDL219W	15.4613
YDL220C	9.69829
YDL222C	246.623
YDL223C	98.8402
YDL224C	41.2148
YDL225W	41.8783
YDL226C	59.5961
YDL227C	8.92521
YDL229W	250.538
YDL230W	58.03
YDL231C	31.1548
YDL232W	209.476
YDL234C	178.519
YDL235C	60.4412
YDL236W	95.6846
YDL237W	85.9899
YDL238C	26.7852
YDL239C	6.65753
YDL240W	7.24219
YDL243C	43.7819
YDL244W	12.1169
YDL245C	1.4739
YDL247W	0.221358
YDL248W	29.5374
YDR001C	231.056
YDR002W	359.496
YDR003W	189.296
YDR004W	33.4495
YDR005C	110.791
YDR006C	51.167
YDR007W	72.3225
YDR009W	67.7474
YDR011W	42.3065
YDR012W	192.239
YDR013W	32.9495
YDR014W	8.75184
YDR014W-A	67.6768
YDR016C	78.1743
YDR017C	28.9071
YDR019C	127.351
YDR021W	8.16921
YDR022C	43.4558
YDR023W	165.65
YDR025W	416.787
YDR026C	24.8301
YDR027C	21.5438
YDR028C	69.4431
YDR030C	32.3322
YDR031W	129.937
YDR032C	751.409
YDR033W	1311.92
YDR034C	105.838
YDR035W	542.297
YDR036C	29.054
YDR037W	242.184
YDR038C	2.0279
YDR040C	2.72035
YDR041W	175.007
YDR043C	515.203
YDR044W	104.821
YDR045C	32.1148
YDR046C	122.574
YDR047W	69.7088
YDR049W	18.6145
YDR050C	6279.63
YDR051C	72.3107
YDR052C	28.2487
YDR054C	240.953
YDR055W	1307.38
YDR057W	35.6097
YDR058C	48.3129
YDR059C	217.705
YDR060W	18.7408
YDR062W	82.5066
YDR063W	135.208
YDR064W	527.303
YDR065W	10.0349
YDR066C	22.2077
YDR068W	93.087
YDR069C	23.3059
YDR070C	704.733
YDR071C	239.253
YDR072C	98.6627
YDR073W	128.992
YDR074W	393.644
YDR075W	29.4528
YDR076W	23.8207
YDR077W	13515.6
YDR078C	30.2608
YDR079C-A	65.4795
YDR079W	145.397
YDR080W	11.1776
YDR081C	15.6318
YDR082W	21.4954
YDR083W	29.9605
YDR084C	73.3204
YDR085C	72.6239
YDR086C	408.419
YDR087C	32.5229
YDR088C	42.4475
YDR089W	19.3385
YDR091C	49.7099
YDR092W	125.188
YDR093W	10.256
YDR096W	83.0085
YDR097C	11.428
YDR098C	97.1637
YDR099W	815.098
YDR100W	142.717
YDR101C	26.2328
YDR103W	25.7407
YDR104C	6.97899
YDR105C	58.7971
YDR106W	5.49589
YDR107C	25.6413
YDR108W	10.8564
YDR110W	11.812
YDR113C	31.4825
YDR115W	181.222
YDR116C	100.941
YDR117C	21.3278
YDR118W	8.8062
YDR119W-A	6028.71
YDR120C	28.5664
YDR121W	70.7356
YDR122W	51.3234
YDR123C	30.813
YDR125C	17.4288
YDR126W	49.6039
YDR127W	100.018
YDR128W	17.3692
YDR129C	284.989
YDR130C	36.0692
YDR131C	14.8361
YDR132C	32.1781
YDR135C	31.281
YDR137W	20.2645
YDR138W	10.4006
YDR139C	137.227
YDR140W	43.1847
YDR141C	13.1611
YDR142C	49.8456
YDR143C	39.8234
YDR144C	6.83058
YDR145W	72.0651
YDR146C	27.1958
YDR147W	9.54032
YDR148C	286.12
YDR150W	10.8988
YDR151C	72.0703
YDR152W	87.21
YDR153C	85.1465
YDR155C	3520.14
YDR156W	94.3868
YDR158W	600.839
YDR159W	9.54117
YDR160W	31.3747
YDR162C	71.2175
YDR163W	101.732
YDR164C	25.6647
YDR165W	21.9687
YDR166C	20.1987
YDR167W	88.3229
YDR168W	75.5839
YDR169C	76.2358
YDR170C	20.2207
YDR171W	1196.94
YDR172W	103.85
YDR173C	37.3983
YDR174W	199.754
YDR175C	61.7755
YDR176W	37.9539
YDR177W	231.424
YDR178W	806.757
YDR179C	29.1595
YDR180W	2.91025
YDR181C	28.5745
YDR182W	70.5331
YDR183W	21.7448
YDR184C	15.7507
YDR185C	50.4106
YDR186C	136.259
YDR188W	169.858
YDR189W	38.3829
YDR190C	70.4243
YDR191W	8.22544
YDR192C	30.6795
YDR194C	31.2291
YDR195W	28.0677
YDR196C	130.899
YDR197W	41.0625
YDR198C	16.4284
YDR200C	24.6233
YDR201W	50.9203
YDR202C	80.9137
YDR204W	101.191
YDR205W	29.0544
YDR206W	33.5358
YDR207C	28.3931
YDR208W	71.9112
YDR211W	42.6485
YDR212W	57.5799
YDR213W	11.9664
YDR214W	111.331
YDR216W	68.5952
YDR217C	6.8648
YDR218C	35.0946
YDR219C	42.305
YDR221W	20.0526
YDR223W	36.5846
YDR224C	2337.22
YDR225W	2378.12
YDR226W	587.585
YDR227W	10.8897
YDR228C	26.3596
YDR229W	74.1169
YDR231C	196.347
YDR232W	159.624
YDR233C	1140.35
YDR234W	128.724
YDR235W	22.3478
YDR236C	44.6395
YDR237W	52.9053
YDR238C	58.8912
YDR239C	15.045
YDR240C	13.1646
YDR242W	38.6426
YDR243C	15.1764
YDR244W	33.3496
YDR245W	51.064
YDR246W	133.924
YDR247W	86.5116
YDR251W	88.9789
YDR252W	17.6437
YDR253C	31.2253
YDR254W	27.4763
YDR255C	67.5782
YDR256C	131.051
YDR257C	18.222
YDR258C	286.819
YDR259C	21.8718
YDR260C	47.8521
YDR261C	26.6219
YDR263C	20.1133
YDR264C	37.9491
YDR265W	39.4698
YDR266C	20.4652
YDR267C	43.8128
YDR268W	14.3556
YDR270W	21.2476
YDR272W	214.67
YDR273W	29.7357
YDR275W	118.779
YDR276C	2953.26
YDR277C	62.2873
YDR279W	33.5455
YDR280W	43.5974
YDR281C	14.9174
YDR282C	22.2553
YDR283C	9.40318
YDR284C	188.015
YDR285W	11.9306
YDR287W	90.6948
YDR288W	48.5924
YDR289C	34.1163
YDR291W	10.1209
YDR292C	50.5379
YDR293C	190.292
YDR294C	109.213
YDR295C	16.6835
YDR296W	101.241
YDR297W	568.122
YDR298C	460.111
YDR299W	11.9128
YDR300C	41.4213
YDR301W	7.95454
YDR302W	34.9846
YDR303C	11.4302
YDR304C	196.09
YDR305C	48.0868
YDR306C	95.6192
YDR308C	39.2636
YDR309C	81.7906
YDR310C	37.9299
YDR311W	17.3458
YDR312W	22.3064
YDR313C	100.495
YDR314C	7.67693
YDR315C	20.4937
YDR316W	23.9732
YDR317W	16.9192
YDR318W	22.1946
YDR320C	24.624
YDR320C-A	203.734
YDR321W	36.8323
YDR322C-A	381.142
YDR322W	57.1669
YDR323C	10.5196
YDR324C	11.1568
YDR325W	9.35814
YDR326C	14.0189
YDR328C	453.487
YDR329C	117.921
YDR330W	82.3107
YDR331W	27.8578
YDR332W	13.7768
YDR333C	21.1122
YDR334W	13.8148
YDR335W	40.1007
YDR337W	57.8693
YDR339C	90.6822
YDR341C	117.75
YDR342C	26.7692
YDR343C	173.527
YDR345C	26.5778
YDR346C	247.421
YDR347W	83.533
YDR348C	103.162
YDR349C	73.3722
YDR350C	34.6934
YDR351W	24.2895
YDR352W	54.6058
YDR353W	445.931
YDR354W	116.781
YDR356W	7.37091
YDR357C	210.556
YDR358W	79.3231
YDR359C	22.0651
YDR361C	42.2201
YDR362C	26.5643
YDR363W	31.2013
YDR363W-A	347.473
YDR364C	23.2154
YDR365C	24.2149
YDR367W	54.9268
YDR368W	103.881
YDR369C	7.77005
YDR370C	12.8627
YDR372C	97.876
YDR373W	96.0044
YDR374C	18.5609
YDR374W-A	134.128
YDR375C	46.1519
YDR376W	32.4177
YDR377W	656.344
YDR378C	168.863
YDR379C-A	160.009
YDR379W	24.3318
YDR380W	105.602
YDR381C-A	177.215
YDR381W	280.508
YDR382W	1091.42
YDR383C	49.2656
YDR384C	237.767
YDR385W	98.1558
YDR386W	17.0225
YDR388W	258.651
YDR389W	39.3747
YDR390C	29.0406
YDR392W	50.5757
YDR393W	20.0326
YDR394W	134.021
YDR395W	18.5467
YDR397C	95.1753
YDR398W	24.867
YDR399W	582.325
YDR400W	49.7348
YDR402C	4.50585
YDR403W	27.3577
YDR404C	127.806
YDR405W	204.384
YDR406W	24.7518
YDR407C	7.85048
YDR408C	181.629
YDR409W	22.4699
YDR410C	28.0184
YDR411C	108.496
YDR412W	33.4266
YDR414C	23.9554
YDR416W	11.6501
YDR418W	460.107
YDR419W	14.8467
YDR420W	18.9324
YDR421W	22.0362
YDR422C	32.4664
YDR423C	55.5921
YDR424C	132.476
YDR425W	41.6733
YDR427W	85.8835
YDR428C	31.4379
YDR429C	174.8
YDR430C	19.8546
YDR432W	401.218
YDR434W	46.0358
YDR435C	114.754
YDR436W	63.3171
YDR437W	21.6428
YDR438W	42.0735
YDR439W	24.8328
YDR440W	13.665
YDR441C	161.144
YDR443C	8.24923
YDR446W	13.3691
YDR447C	289.203
YDR448W	7.69817
YDR449C	8.57323
YDR450W	331.097
YDR451C	14.4183
YDR452W	96.0201
YDR453C	242.228
YDR454C	178.266
YDR456W	63.6257
YDR457W	10.4256
YDR458C	32.2522
YDR459C	40.2564
YDR460W	54.0113
YDR461W	1862.66
YDR462W	138.86
YDR463W	109.269
YDR464W	13.0209
YDR465C	43.4837
YDR466W	29.1556
YDR468C	106.462
YDR469W	61.5299
YDR470C	32.1598
YDR471W	243.764
YDR472W	28.8124
YDR473C	38.2101
YDR475C	96.8447
YDR477W	90.601
YDR478W	17.3705
YDR479C	90.5055
YDR480W	53.6779
YDR481C	190.135
YDR482C	122.915
YDR483W	357.292
YDR484W	14.0076
YDR485C	35.2499
YDR486C	156.633
YDR487C	183.742
YDR488C	9.96276
YDR489W	23.2523
YDR490C	47.7088
YDR492W	596.755
YDR493W	63.3762
YDR494W	107.873
YDR495C	11.1011
YDR496C	20.9633
YDR497C	733.077
YDR498C	53.73
YDR499W	10.2896
YDR500C	547.729
YDR501W	12.6751
YDR502C	165.261
YDR503C	29.6571
YDR504C	23.419
YDR505C	53.434
YDR506C	17.383
YDR507C	19.6104
YDR508C	157.693
YDR510W	586.618
YDR511W	175.134
YDR512C	123.641
YDR513W	1258.6
YDR514C	8.64851
YDR515W	12.2369
YDR516C	915.443
YDR517W	177.6
YDR518W	46.0869
YDR519W	168.587
YDR522C	6.60377
YDR523C	14.6854
YDR524C	40.0332
YDR525W-A	358.838
YDR527W	40.1351
YDR528W	9.17173
YDR529C	1643.13
YDR530C	167.833
YDR531W	36.032
YDR532C	29.5243
YDR533C	453.196
YDR534C	9.08697
YDR536W	22.9785
YDR538W	57.0475
YDR539W	45.3309
YDR540C	19.6541
YDR542W	0.223187
YEL001C	79.7026
YEL002C	109.652
YEL003W	48.3427
YEL004W	22.2029
YEL005C	67.9436
YEL006W	64.3796
YEL007W	68.9515
YEL009C	2121.67
YEL011W	859.087
YEL012W	315.239
YEL013W	74.6737
YEL015W	58.7569
YEL016C	22.4683
YEL017C-A	1274.18
YEL017W	45.4622
YEL018W	37.2376
YEL019C	10.8829
YEL020W-A	151.691
YEL021W	35.0671
YEL022W	6.27049
YEL024W	723.152
YEL026W	176.494
YEL027W	1063.29
YEL029C	24.9349
YEL030W	21.6881
YEL031W	36.6886
YEL032W	24.1227
YEL034W	0
YEL036C	57.4072
YEL037C	136.382
YEL038W	100.679
YEL039C	822.014
YEL040W	23.5434
YEL041W	26.0256
YEL042W	54.8439
YEL043W	24.0991
YEL044W	188.716
YEL046C	291.285
YEL047C	132.448
YEL048C	11.826
YEL049W	34.1477
YEL050C	66.7971
YEL051W	203.225
YEL052W	66.7728
YEL053C	8.60943
YEL054C	496.933
YEL055C	15.8919
YEL056W	68.3875
YEL058W	182.7
YEL059C-A	117.745
YEL060C	2163.38
YEL061C	5.93531
YEL062W	13.0644
YEL063C	113.003
YEL064C	21.6158
YEL065W	8.41512
YEL066W	105.322
YEL069C	16.3946
YEL071W	347.705
YEL072W	17.9262
YER001W	37.9778
YER002W	132.7
YER003C	106.617
YER004W	273.083
YER005W	35.3941
YER006W	77.6478
YER007C-A	71.7793
YER007W	11.6227
YER008C	16.0378
YER009W	385.152
YER010C	125.49
YER011W	7.83694
YER012W	240.88
YER013W	9.92093
YER014C-A	10.0956
YER014W	44.8423
YER015W	39.669
YER016W	28.4929
YER017C	80.8043
YER018C	99.8723
YER019C-A	598.373
YER019W	65.8192
YER020W	547.915
YER021W	121.268
YER022W	16.7215
YER023W	196.541
YER024W	308.607
YER025W	126.18
YER026C	283.803
YER027C	61.2473
YER028C	9.91347
YER029C	75.9449
YER030W	175.361
YER031C	103.2
YER032W	8.52972
YER033C	17.3268
YER034W	49.0748
YER035W	337.571
YER036C	102.719
YER037W	78.8364
YER038C	10.628
YER039C	32.0602
YER040W	22.9049
YER041W	16.8785
YER042W	91.3813
YER043C	491.743
YER044C	695.622
YER044C-A	6.34582
YER045C	200.669
YER046W	184.726
YER047C	26.8528
YER048C	125.521
YER048W-A	172.552
YER049W	24.5772
YER050C	172.331
YER051W	29.0872
YER052C	71.964
YER053C	737.048
YER053C-A	1448.36
YER054C	134.045
YER055C	126.691
YER056C	161.882
YER056C-A	198.879
YER057C	421.081
YER058W	56.7619
YER059W	46.6345
YER060W	59.3716
YER060W-A	18.0038
YER061C	101.927
YER062C	81.5549
YER063W	311.613
YER064C	99.003
YER065C	491.038
YER067W	5043.31
YER068W	47.0303
YER069W	121.543
YER070W	33.1419
YER072W	345.672
YER073W	114.139
YER074W	290.326
YER074W-A	109.055
YER075C	14.1569
YER078C	33.3351
YER080W	62.8058
YER081W	616.821
YER082C	34.4018
YER083C	166.661
YER086W	141.253
YER087C-B	279.492
YER087W	17.2349
YER088C	207.513
YER089C	97.7703
YER090W	106.215
YER091C	341.017
YER092W	45.0094
YER093C	7.00147
YER093C-A	58.9817
YER094C	277.267
YER095W	166.075
YER096W	24.3209
YER098W	27.5551
YER099C	119.79
YER100W	136.857
YER101C	54.262
YER102W	213.493
YER103W	271.107
YER104W	57.7585
YER105C	15.9861
YER106W	8.64538
YER107C	34.171
YER109C	12.7939
YER110C	29.1147
YER111C	8.73858
YER112W	125.117
YER113C	14.897
YER114C	23.27
YER115C	78.9072
YER116C	56.761
YER117W	352.264
YER118C	26.7855
YER119C	54.7932
YER120W	336.009
YER122C	103.431
YER123W	22.7876
YER124C	83.4164
YER125W	106.189
YER126C	95.1383
YER127W	11.617
YER128W	36.9342
YER129W	26.1551
YER130C	34.6086
YER131W	593.449
YER132C	6.8053
YER133W	238.513
YER134C	96.5627
YER136W	193.76
YER139C	34.8575
YER140W	14.8846
YER141W	248.319
YER142C	80.6533
YER143W	92.1592
YER144C	50.6607
YER145C	233.916
YER146W	82.9011
YER147C	25.4933
YER148W	142.763
YER149C	17.5327
YER150W	3057.26
YER151C	23.8703
YER152C	129.647
YER153C	17.9441
YER154W	75.9911
YER155C	16.181
YER157W	12.4926
YER159C	444.328
YER161C	77.9445
YER162C	31.298
YER163C	89.478
YER164W	18.0344
YER165W	503.389
YER166W	20.5077
YER167W	34.8031
YER168C	20.39
YER169W	56.0105
YER170W	39.0746
YER171W	13.0695
YER172C	9.18492
YER173W	14.3675
YER174C	73.8522
YER175C	160.054
YER176W	15.5487
YER177W	1228.15
YER178W	607.98
YER179W	61.372
YER180C	37.1832
YER180C-A	23.5515
YER183C	46.2408
YER185W	37.1328
YER190W	0.0616411
YFL001W	21.3973
YFL002C	38.1283
YFL003C	8.41815
YFL004W	44.9877
YFL005W	392.457
YFL007W	14.5357
YFL008W	7.40123
YFL009W	32.8915
YFL010C	259.634
YFL010W-A	205.289
YFL011W	15.6011
YFL013C	34.3668
YFL014W	4148.81
YFL016C	94.3088
YFL017C	82.3673
YFL017W-A	55.3962
YFL018C	329.091
YFL020C	20.1994
YFL021W	140.105
YFL022C	74.1584
YFL023W	11.419
YFL024C	27.265
YFL025C	11.2218
YFL026W	277.308
YFL027C	19.4137
YFL028C	91.1674
YFL029C	46.1072
YFL030W	202.822
YFL031W	601.596
YFL033C	15.0353
YFL034C-A	31.9371
YFL034C-B	21.5383
YFL036W	25.4676
YFL037W	182.73
YFL038C	730.066
YFL039C	1337.43
YFL041W	47.1624
YFL044C	57.32
YFL045C	314.748
YFL047W	13.4462
YFL048C	52.2554
YFL049W	38.3013
YFL050C	20.4036
YFL053W	14.5977
YFL055W	19.0827
YFL056C	86.4688
YFL057C	88.7833
YFL058W	8.7907
YFL059W	47.6889
YFL060C	9.44593
YFL062W	12.1525
YFR001W	88.3941
YFR002W	21.3795
YFR003C	152.513
YFR004W	218.596
YFR005C	12.3901
YFR007W	26.0139
YFR008W	41.4817
YFR009W	38.3424
YFR010W	109.697
YFR011C	135.739
YFR012W	14.6336
YFR013W	16.553
YFR014C	227.766
YFR015C	325.782
YFR016C	27.2902
YFR017C	893.391
YFR019W	6.96767
YFR021W	32.1265
YFR022W	34.8057
YFR023W	16.5917
YFR024C-A	100.749
YFR025C	59.1553
YFR026C	140.271
YFR027W	17.8122
YFR028C	24.4617
YFR029W	28.517
YFR030W	21.4794
YFR031C	11.0006
YFR031C-A	345.033
YFR032C-A	1396.19
YFR033C	1203.76
YFR034C	67.1259
YFR036W	48.3941
YFR037C	86.2439
YFR038W	13.1234
YFR039C	39.9536
YFR040W	52.5843
YFR041C	45.344
YFR042W	29.9615
YFR043C	43.9126
YFR044C	57.1489
YFR046C	27.6771
YFR047C	412.84
YFR048W	23.4212
YFR049W	366.972
YFR050C	203.503
YFR051C	81.017
YFR052W	189.334
YFR053C	4139.94
YFR055W	34.7087
YGL001C	155.167
YGL002W	98.44
YGL003C	52.1062
YGL004C	47.9383
YGL005C	101.946
YGL006W	83.7774
YGL008C	1646.73
YGL009C	337.294
YGL011C	316.383
YGL012W	79.7066
YGL013C	12.4292
YGL014W	44.1146
YGL016W	7.01349
YGL017W	28.0773
YGL018C	55.909
YGL019W	116.153
YGL020C	83.5345
YGL021W	24.1312
YGL022W	77.4112
YGL023C	86.0699
YGL025C	60.5254
YGL026C	139.873
YGL027C	25.3866
YGL028C	96.2356
YGL029W	33.2549
YGL030W	1354.52
YGL031C	913.345
YGL032C	347.391
YGL033W	8.24657
YGL035C	127.114
YGL037C	1326.02
YGL038C	73.8866
YGL039W	30.8747
YGL040C	108.81
YGL043W	34.6209
YGL044C	52.2837
YGL045W	125.877
YGL047W	47.4927
YGL048C	165.227
YGL049C	41.8219
YGL050W	36.5661
YGL051W	12.2337
YGL053W	64.6774
YGL054C	279.771
YGL055W	4439.76
YGL056C	112.319
YGL057C	20.348
YGL058W	68.841
YGL059W	110.712
YGL060W	15.2696
YGL061C	18.9475
YGL062W	278.829
YGL063W	21.369
YGL064C	6.29491
YGL065C	25.8268
YGL066W	34.2291
YGL067W	27.637
YGL068W	118.171
YGL070C	58.1829
YGL071W	26.5367
YGL073W	55.1149
YGL075C	16.9133
YGL076C	135.272
YGL077C	107.352
YGL078C	97.9728
YGL079W	36.8707
YGL080W	267.377
YGL083W	20.6317
YGL084C	36.9703
YGL086W	12.3506
YGL087C	194.668
YGL089C	12.4985
YGL090W	23.614
YGL091C	51.1384
YGL092W	15.0601
YGL093W	15.6798
YGL094C	11.9299
YGL095C	36.3502
YGL096W	188.65
YGL097W	58.3725
YGL098W	74.6498
YGL099W	21.5708
YGL100W	51.3879
YGL103W	137.337
YGL104C	65.2683
YGL105W	186.532
YGL106W	234.589
YGL107C	25.0439
YGL108C	75.5009
YGL110C	18.4503
YGL111W	42.0217
YGL112C	31.1323
YGL113W	12.5542
YGL115W	95.0633
YGL116W	25.0609
YGL119W	18.9362
YGL120C	17.7576
YGL121C	860.779
YGL122C	166.655
YGL123W	1026.22
YGL124C	17.8363
YGL125W	108.427
YGL126W	42.5286
YGL127C	80.806
YGL128C	23.7726
YGL129C	39.9995
YGL130W	33.6397
YGL131C	9.36708
YGL133W	13.791
YGL134W	43.682
YGL135W	189.535
YGL136C	45.6825
YGL137W	60.5228
YGL139W	35.2789
YGL141W	19.3575
YGL142C	31.0324
YGL143C	26.0924
YGL144C	9.32994
YGL145W	14.7339
YGL147C	340.384
YGL148W	216.117
YGL150C	24.3341
YGL151W	13.4194
YGL153W	48.9196
YGL154C	53.4178
YGL155W	26.934
YGL156W	117.041
YGL157W	11.4076
YGL158W	17.3721
YGL160W	58.1733
YGL161C	163.771
YGL162W	245.481
YGL163C	21.208
YGL164C	39.3756
YGL166W	87.6429
YGL167C	62.4607
YGL168W	93.2761
YGL169W	26.6262
YGL170C	13.4376
YGL171W	14.8173
YGL172W	49.9005
YGL173C	44.7386
YGL174W	25.9942
YGL175C	4.29281
YGL178W	22.2007
YGL179C	23.3953
YGL180W	33.5917
YGL181W	106.526
YGL183C	7.99072
YGL184C	37.495
YGL186C	85.9059
YGL187C	745.079
YGL189C	1733.76
YGL190C	83.3742
YGL191W	1551.79
YGL192W	81.3765
YGL194C	13.8307
YGL195W	14.6192
YGL196W	66.9791
YGL197W	27.4049
YGL198W	148.426
YGL200C	303.946
YGL201C	10.6908
YGL202W	317.438
YGL203C	36.0322
YGL205W	24.7702
YGL206C	41.4881
YGL207W	37.1458
YGL208W	123.148
YGL209W	59.4407
YGL210W	54.3746
YGL211W	49.8855
YGL212W	21.383
YGL213C	33.6134
YGL215W	144.448
YGL216W	15.2336
YGL219C	170.534
YGL220W	158.686
YGL221C	80.6432
YGL222C	73.8052
YGL223C	26.3596
YGL224C	58.3361
YGL225W	66.7152
YGL226C-A	137.531
YGL226W	82.3237
YGL227W	37.3968
YGL228W	106.294
YGL229C	7.32022
YGL231C	155.53
YGL232W	41.3815
YGL233W	17.4307
YGL234W	189.073
YGL236C	21.5575
YGL237C	118.784
YGL238W	21.2108
YGL240W	11.082
YGL241W	11.3934
YGL243W	21.0792
YGL244W	67.2001
YGL245W	127.448
YGL246C	20.8807
YGL247W	30.961
YGL248W	311.368
YGL249W	16.0119
YGL250W	72.9822
YGL251C	8.08862
YGL252C	79.7332
YGL253W	287.303
YGL254W	22.8648
YGL255W	3552.78
YGL256W	6027.83
YGL257C	127.733
YGL258W	13.6985
YGR002C	33.2334
YGR003W	10.0773
YGR004W	17.8482
YGR005C	90.1087
YGR006W	16.3963
YGR007W	65.2637
YGR008C	4721.86
YGR009C	58.6089
YGR010W	44.9338
YGR012W	38.2466
YGR013W	41.7044
YGR014W	29.0512
YGR019W	293.229
YGR020C	349.712
YGR023W	162.095
YGR024C	67.5142
YGR027C	1560.38
YGR028W	79.5291
YGR029W	79.28
YGR030C	44.1602
YGR031C-A	0
YGR031W	77.547
YGR032W	243.977
YGR033C	85.968
YGR034W	374.974
YGR036C	48.0476
YGR037C	1157.25
YGR038W	36.936
YGR040W	27.8107
YGR041W	22.3733
YGR042W	80.5206
YGR043C	444.461
YGR044C	266.916
YGR046W	117.328
YGR047C	11.7656
YGR048W	75.2727
YGR049W	172.808
YGR054W	43.1755
YGR055W	71.6237
YGR056W	14.1278
YGR057C	50.7884
YGR058W	30.2206
YGR059W	15.8454
YGR060W	369.716
YGR061C	105.559
YGR062C	28.3687
YGR063C	116.51
YGR065C	475.963
YGR068C	14.4203
YGR070W	37.051
YGR071C	11.7934
YGR072W	48.1647
YGR074W	68.3581
YGR075C	25.5489
YGR076C	113.15
YGR077C	36.8009
YGR078C	31.7317
YGR080W	100.318
YGR081C	34.0451
YGR082W	108.316
YGR083C	28.3725
YGR084C	40.4291
YGR085C	132.868
YGR086C	1363.47
YGR087C	169.121
YGR088W	385.13
YGR089W	21.789
YGR090W	9.92534
YGR091W	17.6764
YGR092W	64.1915
YGR093W	31.7901
YGR094W	114.206
YGR095C	166.736
YGR096W	72.9582
YGR097W	54.8354
YGR098C	5.64619
YGR099W	16.6581
YGR100W	36.7743
YGR101W	62.4944
YGR102C	179.206
YGR103W	59.9383
YGR104C	27.2687
YGR105W	133.297
YGR106C	195.639
YGR108W	42.9115
YGR109C	9.21453
YGR110W	39.9635
YGR112W	41.8934
YGR113W	29.6748
YGR116W	30.6308
YGR118W	332.202
YGR119C	47.0357
YGR120C	31.421
YGR121C	133.111
YGR122W	22.3819
YGR123C	15.079
YGR124W	144.973
YGR128C	11.3847
YGR129W	31.6316
YGR130C	179.289
YGR131W	31.1723
YGR132C	304.189
YGR133W	61.7901
YGR134W	8.24839
YGR135W	208.746
YGR136W	242.523
YGR138C	95.6396
YGR140W	17.5805
YGR141W	74.958
YGR142W	118.01
YGR143W	100.712
YGR144W	375.106
YGR145W	18.3089
YGR146C	291.967
YGR147C	79.9891
YGR148C	508.78
YGR150C	12.8628
YGR152C	28.4044
YGR154C	38.05
YGR155W	177.982
YGR156W	15.4046
YGR157W	47.9583
YGR158C	38.8408
YGR159C	110.923
YGR162W	48.9672
YGR163W	71.0675
YGR165W	45.5818
YGR166W	21.2291
YGR167W	254.592
YGR169C	10.0021
YGR170W	18.2567
YGR171C	13.6435
YGR172C	56.3974
YGR173W	22.1754
YGR174C	330.385
YGR175C	438.991
YGR177C	6.56895
YGR178C	91.0647
YGR179C	17.1191
YGR180C	561.733
YGR181W	116.922
YGR183C	733.067
YGR184C	24.002
YGR185C	80.5384
YGR186W	65.4961
YGR187C	29.9455
YGR188C	6.02475
YGR189C	891.134
YGR191W	119.565
YGR192C	13910.1
YGR193C	104.737
YGR194C	75.535
YGR195W	49.0913
YGR196C	23.7042
YGR197C	49.1818
YGR198W	16.7052
YGR199W	23.4168
YGR200C	17.9695
YGR202C	93.2172
YGR203W	73.5859
YGR204W	222.49
YGR205W	77.4905
YGR206W	93.7255
YGR207C	91.8399
YGR208W	17.9457
YGR209C	1476.05
YGR211W	41.0908
YGR212W	20.1535
YGR213C	32.2709
YGR214W	365.644
YGR215W	98.5342
YGR216C	16.4248
YGR217W	4.02437
YGR218W	47.1168
YGR220C	78.9396
YGR221C	28.4361
YGR222W	32.9763
YGR223C	67.5442
YGR224W	20.0123
YGR225W	29.2926
YGR227W	20.2286
YGR229C	60.3202
YGR230W	46.9664
YGR231C	225.597
YGR232W	96.3477
YGR233C	17.454
YGR234W	827.116
YGR235C	153.84
YGR236C	552.772
YGR238C	18.2281
YGR239C	67.6543
YGR240C	380.321
YGR241C	79.0705
YGR243W	923.888
YGR244C	312.269
YGR245C	24.2981
YGR246C	28.0461
YGR247W	71.565
YGR248W	277.23
YGR249W	111.214
YGR250C	106.4
YGR251W	51.9551
YGR252W	33.5116
YGR253C	253.398
YGR254W	10909.3
YGR255C	80.8482
YGR256W	180.001
YGR257C	41.8698
YGR258C	21.0393
YGR260W	1086.1
YGR261C	17.2703
YGR262C	73.0802
YGR263C	22.8118
YGR264C	32.7625
YGR266W	24.2359
YGR267C	309.348
YGR268C	177.286
YGR270W	30.4769
YGR271C-A	28.0443
[truncated: 3,042 more rows]
